# Supplementary material for: Cell Compartment-specific Folding of Ty1 Long Terminal Repeat Retrotransposon RNA Genome
Source: Preprints.org preprint supplement (doi:10.20944/preprints202207.0372.v1), 2022-07-25
Supplement: Supplementary file 1 [file supplementary]

## SUPPLEMENTARY TABLES AND FIGURES

### Cell compartment-specific folding of Ty1 retrotransposon RNA genome

Małgorzata Zawadzka<sup>1</sup>, Angelika Andrzejewska-Romanowska<sup>1</sup>, Julita Gumna<sup>1</sup>, David J. Garfinkel<sup>2</sup> and Katarzyna Pachulska-Wieczorek<sup>1,\*</sup>

**Table S1** . Reverse transcription primers.

| PRIMER    | SEQUENCE (5'-3')         |
|-----------|--------------------------|
| Ty1 PR_1  | TCAGGTGATGGAGTGCTCAG     |
| Ty1 PR_2  | TCGTTTGCCTCTTGGGTATC     |
| Ty1 PR_3  | CATCACTCGGATTTCTCCTG     |
| Ty1 PR_4  | TTGGTGTTCCTGGAAGTGA      |
| Ty1 PR_5  | TCGAATTGTCTGTGCATTGG     |
| Ty1 PR_6  | AGACACTGGCCTGAAACTGG     |
| Ty1 PR_7  | GCCACGAGGATGTATTTTGG     |
| Ty1 PR_8  | GGAGGTGTGGAATCGGTTGG     |
| Ty1 PR_9  | GGTACGTTTGTATGATTAGTCTCA |
| Ty1 PR_10 | GTCTCGTGATACCTTAATTTTCAG |
| Ty1 PR_11 | TGCTGAATATCACCTCTTGC     |
| Ty1 PR_12 | CAAATTGTCACCTGACTG       |
| Ty1 PR_13 | TGCATTTTCATGTACCTTCTC    |
| Ty1 PR_14 | GCTTCCGTAGTTGAAGTACAT    |
| Ty1 PR_15 | TCTATTCCAACATACCACCC     |
| Ty1 PR_16 | CTCCTCAAGGATTTAGGAATCC   |
| Ty1 PR_17 | CATTGTTGATAAAGGCTATA     |
| U1 PR     | TAAGATCCACCCGTTCTAC      |

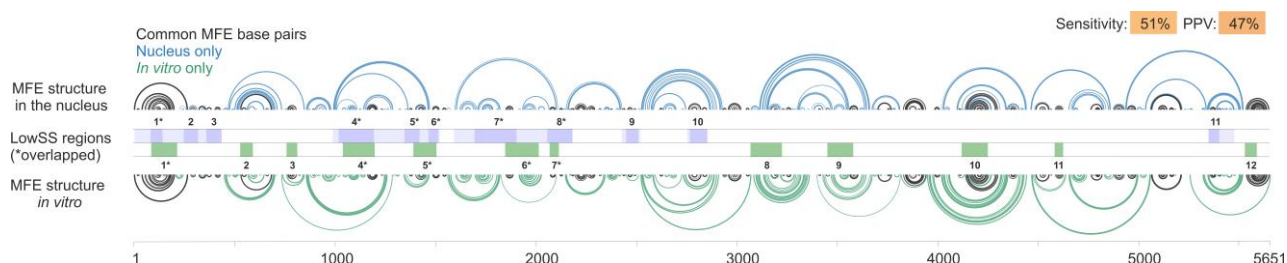

**Figure S1.** Comparison of SHAPE-directed MFE model predicted for nuclear and Ty1 gRNA *in vitro*. Location of lowSS regions identified for nuclear and in vitro Ty1 gRNA are presented. Overlapped regions are marked by asterix \*.
