# Supplementary material for: Cell Compartment-specific Folding of Ty1 Long Terminal Repeat Retrotransposon RNA Genome
Source: Preprints.org preprint supplement (doi:10.20944/preprints202207.0372.v1), 2022-07-25
Supplement: Supplementary file 2 [file supplementary]

| nt |   | nuclear Ty1 | SD     | nt    |   | U1 NMIA | SD      | U1 NAI | SD      |
|----|---|-------------|--------|-------|---|---------|---------|--------|---------|
| 1  | G | -           | 0.0000 | 1-128 |   | -       | 0.0000  | -      | 0.0000  |
| 2  | A | -           | 0.0000 | 129   | C | 0.004   | 0.0028  | 0.235  | 0.2694  |
| 3  | G | -           | 0.0000 | 130   | C | 0.217   | 0.1428  | 0.145  | 0.1237  |
| 4  | G | -           | 0.0000 | 131   | U | 1.394   | 0.2652  | 3.045  | 0.1603  |
| 5  | A | -           | 0.0000 | 132   | U | 0.203   | 0.0099  | 0.554  | 0.0184  |
| 6  | G | -           | 0.0000 | 133   | G | 0.34    | 0.0594  | 0.687  | 0.2277  |
| 7  | A | 0.378       | 0.0750 | 134   | G | 0.409   | 0.0021  | 0.825  | 0.3147  |
| 8  | A | 0.145       | 0.0000 | 135   | U | 0.753   | 0.1640  | -      | 0.0000  |
| 9  | C | 0.390       | 0.3528 | 136   | C | 0.129   | 0.0064  | 0.287  | 0.1315  |
| 10 | U | 0.383       | 0.0078 | 137   | A | 0.085   | 0.0311  | 0.216  | 0.1803  |
| 11 | U | 0.051       | 0.0456 | 138   | C | 0.009   | 0.00636 | 0.051  | 0.0113  |
| 12 | C | 0.500       | 0.2141 | 139   | A | 0.093   | 0.0120  | 0.306  | 0.0170  |
| 13 | U | 0.724       | 0.2009 | 140   | C | 0.078   | 0.0423  | 0.017  | 0.0214  |
| 14 | A | 0.635       | 0.0746 | 141   | A | 0.032   | 0.0417  | 0.17   | 0.0028  |
| 15 | G | 0.469       | 0.1392 | 142   | C | 0.109   | 0.0679  | 0.181  | 0.1061  |
| 16 | U | 1.423       | 0.4215 | 143   | A | 0.282   | 0.1146  | 0.498  | 0.0304  |
| 17 | A | 0.736       | 0.1042 | 144   | C | -       | 0.0000  | 0.156  | 0.1287  |
| 18 | U | 0.157       | 0.0881 | 145   | A | -       | 0.0000  | 0.03   | 0.0191  |
| 19 | A | 0.485       | 0.0250 | 146   | U | -       | 0.0000  | 0.272  | 0.0820  |
| 20 | U | 0.154       | 0.0930 | 147   | A | -       | 0.0000  | 0.049  | 0.0120  |
| 21 | U | 0.281       | 0.0685 | 148   | C | 0.114   | 0.0750  | 0.208  | 0.1131  |
| 22 | C | 0.342       | 0.0637 | 149   | G | 0.168   | 0.0354  | 0.296  | 0.3097  |
| 23 | U | 0.608       | 0.2661 | 150   | G | 0.252   | 0.0219  | 0.334  | 0.1358  |
| 24 | G | 0.784       | 0.1652 | 151   | C | 0.327   | 0.0120  | 0.512  | 0.0792  |
| 25 | U | 0.454       | 0.1019 | 152   | G | 0.454   | 0.1704  | 0.425  | 0.0134  |
| 26 | A | 0.074       | 0.0341 | 153   | C | 0.446   | 0.0955  | 1.051  | 0.5240  |
| 27 | U | 0.380       | 0.1035 | 154   | G | 0.239   | 0.1308  | 0.145  | 0.0877  |
| 28 | A | 0.395       | 0.0574 | 155   | G | -       | 0.0000  | -      | 0.0000  |
| 29 | C | 0.223       | 0.0831 | 156   | A | -       | 0.0000  | 0.49   | 0.0651  |
| 30 | C | 0.371       | 0.0758 | 157   | A | -       | 0.0000  | 0.134  | 0.1633  |
| 31 | U | 0.594       | 0.0917 | 158   | G | -       | 0.0000  | 0.37   | 0.1025  |
| 32 | A | 0.671       | 0.1048 | 159   | G | 0.005   | 0.0042  | 0.075  | 0.0983  |
| 33 | A | 0.543       | 0.1149 | 160   | C | 2.102   | 0.2772  | 1.917  | 0.08254 |
| 34 | U | 0.471       | 0.1165 | 161   | G | 2.216   | 0.3769  | 2.361  | 0.09041 |
| 35 | A | 0.708       | 0.1651 | 162   | U | 0.321   | 0.1259  | 0.548  | 0.0665  |
| 36 | U | 0.285       | 0.1140 | 163   | G | 0.32    | 0.0615  | 0.603  | 0.1358  |
| 37 | U | 0.444       | 0.2124 | 164   | U | -       | 0.0000  | 0.032  | 0.0000  |
| 38 | A | 0.600       | 0.1336 | 165   | U | -       | 0.0000  | 0.167  | 0.0000  |
| 39 | U | 0.231       | 0.0837 | 166   | U | -       | 0.0000  | 0.612  | 0.0000  |
| 40 | A | 0.385       | 0.1830 | 167   | G | -       | 0.0000  | -      | 0.0000  |
| 41 | G | 0.597       | 0.2254 | 168   | C | 0.013   | 0.0099  | 0.172  | 0.2305  |
| 42 | C | 0.667       | 0.2060 | 169   | U | 0.233   | 0.18573 | 0.188  | 0.1739  |
| 43 | C | 0.498       | 0.1863 | 170   | G | 0.969   | 0.1916  | 1.076  | 0.0226  |
| 44 | U | 0.163       | 0.0499 | 171   | A | 0.358   | 0.1619  | 0.555  | 0.1952  |
| 45 | U | 0.185       | 0.0921 | 172   | C | 0.255   | 0.1160  | 0.493  | 0.0007  |
| 46 | U | 0.397       | 0.0560 | 173   | G | 0.052   | 0.00579 | 0.275  | 0.2956  |
| 47 | A | 0.933       | 0.1086 | 174   | U | 0.157   | 0.13923 | 0.412  | 0.0969  |
| 48 | U | 0.260       | 0.0983 | 175   | U | 0.125   | 0.1654  | 0.371  | 0.2489  |
| 49 | C | 0.386       | 0.0251 | 176   | U | 0.018   | 0.0274  | 0.372  | 0.0170  |

|    |   |       |        |     |   |       |         |       |        |
|----|---|-------|--------|-----|---|-------|---------|-------|--------|
| 50 | A | 0.757 | 0.1116 | 177 | C | 0.139 | 0.0000  | 0.276 | 0.0276 |
| 51 | A | 0.664 | 0.1019 | 178 | C | -     | 0.0000  | 0.206 | 0.0332 |
| 52 | C | 0.220 | 0.1304 | 179 | A | -     | 0.0000  | 0.222 | 0.0544 |
| 53 | A | 0.309 | 0.0670 | 180 | U | -     | 0.0000  | 0.442 | 0.1039 |
| 54 | A | 0.505 | 0.1834 | 181 | U | -     | 0.0000  | 0.420 | 0.1295 |
| 55 | U | 0.693 | 0.0872 | 182 | C | -     | 0.0000  | 0.345 | 0.3635 |
| 56 | G | 0.091 | 0.0615 | 183 | C | 0.037 | 0.0502  | 0.135 | 0.1287 |
| 57 | G | 0.168 | 0.1005 | 184 | C | 0.953 | 0.2256  | 1.284 | 0.0361 |
| 58 | A | 0.202 | 0.0696 | 185 | U | 0.22  | 0.1039  | 0.426 | 0.2666 |
| 59 | U | 0.140 | 0.0840 | 186 | U | 0.229 | 0.1039  | 0.42  | 0.1442 |
| 60 | C | 0.422 | 0.0594 | 187 | G | 0.316 | 0.0431  | 0.262 | 0.0509 |
| 61 | C | 0.293 | 0.0384 | 188 | U | 0.367 | 0.2065  | 0.56  | 0.2454 |
| 62 | C | 0.715 | 0.1973 | 189 | U | 0.164 | 0.0841  | 0.358 | 0.0530 |
| 63 | A | 0.537 | 0.1093 | 190 | U | 0.169 | 0.0150  | 0.392 | 0.0460 |
| 64 | A | 0.584 | 0.0730 | 191 | C | 0.094 | 0.0799  | 0.389 | 0.0509 |
| 65 | C | 0.980 | 0.2720 | 192 | A | 0.099 | 0.0424  | 0.259 | 0.2447 |
| 66 | A | 0.832 | 0.0732 | 193 | A | 1.251 | 0.3352  | 1.269 | 0.2065 |
| 67 | A | 0.988 | 0.0702 | 194 | U | 0.079 | 0.08121 | 0.231 | 0.1591 |
| 68 | U | 0.275 | 0.1552 | 195 | C | 0.024 | 0.03109 | 0.308 | 0.1245 |
| 69 | U | 0.285 | 0.1382 | 196 | A | 0.144 | 0.0884  | 0.303 | 0.0651 |
| 70 | A | 0.388 | 0.1278 | 197 | U | 1.285 | 0.0707  | 1.133 | 0.2447 |
| 71 | U | 0.270 | 0.0738 | 198 | U | 3.552 | 0.7269  | 2.530 | 0.6608 |
| 72 | C | 0.535 | 0.1047 | 199 | G | 0.394 | 0.0177  | 0.464 | 0.2595 |
| 73 | U | 0.182 | 0.1002 | 200 | G | 0.262 | 0.0460  | 0.236 | 0.2220 |
| 74 | C | 0.413 | 0.0935 | 201 | U | 0.163 | 0.0926  | 0.28  | 0.0544 |
| 75 | A | 0.574 | 0.0478 | 202 | U | 0.053 | 0.0218  | 0.151 | 0.1520 |
| 76 | A | 0.589 | 0.0780 | 203 | A | 0.125 | 0.0791  | 0.259 | 0.1605 |
| 77 | C | 0.474 | 0.1565 | 204 | A | 0.072 | 0.0856  | 0.224 | 0.1230 |
| 78 | A | 0.877 | 0.0934 | 205 | U | 0.122 | 0.0636  | 0.583 | 0.0035 |
| 79 | U | 0.307 | 0.0431 | 206 | C | 0.046 | 0.0141  | 0.098 | 0.0269 |
| 80 | U | 0.127 | 0.0418 | 207 | C | 0.109 | 0.0806  | 0.129 | 0.1252 |
| 81 | C | 0.145 | 0.0532 | 208 | C | 0.191 | 0.0170  | 0.332 | 0.1315 |
| 82 | A | 0.552 | 0.2137 | 209 | U | 0.173 | 0.0151  | 0.453 | 0.0339 |
| 83 | C | 0.694 | 0.3007 | 210 | U | 0.239 | 0.0210  | 0.389 | 0.2751 |
| 84 | C | 0.828 | 0.3940 | 211 | G | -     | 0.0000  | 0.2   | 0.0403 |
| 85 | C | 0.776 | 0.2316 | 212 | A | 0.014 | 0.0007  | 0.149 | 0.1068 |
| 86 | A | 0.502 | 0.0908 | 213 | U | 0.321 | 0.0926  | 0.348 | 0.2397 |
| 87 | A | 0.743 | 0.0463 | 214 | U | 0.569 | 0.1563  | 0.909 | 0.2220 |
| 88 | U | 0.163 | 0.1249 | 215 | C | 0.124 | 0.0877  | 0.157 | 0.1322 |
| 89 | U | 0.326 | 0.0649 | 216 | C | 0.095 | 0.0923  | 0.201 | 0.0778 |
| 90 | C | 0.283 | 0.0977 | 217 | U | 0.119 | 0.0642  | 0.391 | 0.0955 |
| 91 | U | 0.248 | 0.0625 | 218 | U | 0.112 | 0.0212  | 0.565 | 0.1789 |
| 92 | C | 0.237 | 0.0969 | 219 | U | 0.532 | 0.0226  | 1.195 | 0.2786 |
| 93 | A | 0.802 | 0.4830 | 220 | G | 0.74  | 0.1633  | 1.183 | 0.5233 |
| 94 | U | 0.735 | 0.2588 | 221 | G | 1.263 | 0.7241  | 0.888 | 0.1407 |
| 95 | G | 0.351 | 0.0749 | 222 | G | -     | 0.0000  | 1.492 | 0.3168 |
| 96 | G | 0.210 | 0.1257 | 223 | G | -     | 0.0000  | -     | 0.0000 |
| 97 | U | 0.253 | 0.0624 | 224 | A | -     | 0.0000  | -     | 0.0000 |
| 98 | A | 0.574 | 0.1527 | 225 | U | -     | 0.0000  | -     | 0.0000 |
| 99 | G | 0.059 | 0.0519 | 226 | U | 0.236 | 0.23059 | 0.58  | 0.2298 |

|     |   |       |        |     |   |       |         |       |         |
|-----|---|-------|--------|-----|---|-------|---------|-------|---------|
| 100 | C | 0.360 | 0.1448 | 227 | U | 0.076 | 0.07799 | 0.53  | 0.0757  |
| 101 | G | 0.332 | 0.1370 | 228 | U | 0.016 | 0.0140  | 0.01  | 0.0049  |
| 102 | C | 0.505 | 0.1208 | 229 | U | 1.293 | 0.3055  | 1.172 | 0.2758  |
| 103 | C | 0.682 | 0.1491 | 230 | G | 0.234 | 0.1336  | 0.317 | 0.1379  |
| 104 | U | 0.271 | 0.1003 | 231 | G | 0.268 | 0.0962  | 0.258 | 0.0198  |
| 105 | G | 0.340 | 0.0482 | 232 | G | 1.724 | 0.3224  | 1.406 | 0.0000  |
| 106 | U | 0.660 | 0.1198 | 233 | U | 0.332 | 0.2560  | 0.621 | 0.1181  |
| 107 | G | 0.258 | 0.0720 | 234 | U | 0.172 | 0.0000  | 0.311 | 0.1633  |
| 108 | C | 0.311 | 0.1131 | 235 | A | 0.283 | 0.0523  | 0.923 | 0.1018  |
| 109 | U | 0.163 | 0.0631 | 236 | A | 0.09  | 0.0403  | 0.706 | 0.0403  |
| 110 | U | 0.517 | 0.0532 | 237 | A | 0.244 | 0.0488  | 0.571 | 0.0049  |
| 111 | C | 0.681 | 0.2032 | 238 | C | 0.308 | 0.0311  | 0.269 | 0.1082  |
| 112 | G | 0.535 | 0.1317 | 239 | U | 1.263 | 0.1966  | 1.172 | 0.1365  |
| 113 | G | 0.841 | 0.3988 | 240 | G | 1.071 | 0.0163  | 0.917 | 0.1633  |
| 114 | U | 0.670 | 0.2409 | 241 | A | -     | 0.0000  | -     | 0.0000  |
| 115 | U | 0.463 | 0.1292 | 242 | U | 1.334 | 0.2850  | 1.395 | 0.4815  |
| 116 | A | 0.136 | 0.0443 | 243 | U | 0.363 | 0.1541  | 0.579 | 0.3302  |
| 117 | C | 0.154 | 0.0401 | 244 | U | 0.146 | 0.0453  | 0.324 | 0.2758  |
| 118 | U | 0.426 | 0.0538 | 245 | U | 0.056 | 0.0410  | 0.213 | 0.0863  |
| 119 | U | 0.223 | 0.0429 | 246 | U | 0.37  | 0.0580  | 0.615 | 0.0643  |
| 120 | C | 0.054 | 0.0492 | 247 | G | 0.23  | 0.0700  | 0.253 | 0.0672  |
| 121 | U | 0.432 | 0.1459 | 248 | G | 0.076 | 0.0134  | 0.101 | 0.0134  |
| 122 | A | 0.899 | 0.1237 | 249 | G | 0.074 | 0.0184  | 0.069 | 0.0134  |
| 123 | A | 1.201 | 0.0726 | 250 | G | 1.505 | 0.0806  | 2.337 | 0.3490  |
| 124 | G | 0.349 | 0.0523 | 251 | C | 1.281 | 0.2001  | 2.312 | 0.4272  |
| 125 | G | 0.495 | 0.1551 | 252 | C | 0.484 | 0.1358  | 1.139 | 0.0643  |
| 126 | A | 0.336 | 0.1082 | 253 | C | 0.934 | 0.1336  | 0.44  | 0.0544  |
| 127 | A | 0.264 | 0.0699 | 254 | U | 3.757 | 0.5798  | 2.615 | 0.3461  |
| 128 | G | 0.580 | 0.3680 | 255 | U | 0.851 | 0.3578  | 0.824 | 0.2779  |
| 129 | U | 0.192 | 0.0439 | 256 | U | 0.559 | 0.4476  | 0.769 | 0.3380  |
| 130 | C | 0.107 | 0.0730 | 257 | G | 0.244 | 0.0000  | 0.143 | 0.1110  |
| 131 | C | 0.202 | 0.0832 | 258 | U | 0.163 | 0.2298  | 0.392 | 0.2970  |
| 132 | A | 0.426 | 0.1093 | 259 | U | 0.841 | 0.3755  | 0.895 | 0.2595  |
| 133 | C | 0.371 | 0.1948 | 260 | U | 0.072 | 0.0373  | 0.385 | 0.1082  |
| 134 | A | 0.439 | 0.1276 | 261 | C | 0.188 | 0.1273  | 0.231 | 0.1082  |
| 135 | C | 0.312 | 0.1769 | 262 | U | 0.137 | 0.1435  | 0.416 | 0.0948  |
| 136 | A | 0.613 | 0.0473 | 263 | U | -     | 0.0000  | 0.309 | 0.0926  |
| 137 | A | 1.000 | 0.1600 | 264 | C | 0.027 | 0.00508 | 0.075 | 0.07136 |
| 138 | A | 1.007 | 0.1055 | 265 | U | 0.161 | 0.02963 | 0.665 | 0.1662  |
| 139 | U | 0.351 | 0.1092 | 266 | G | 0.236 | 0.0813  | 0.405 | 0.0495  |
| 140 | C | 0.597 | 0.1045 | 267 | C | 0.132 | 0.1096  | 0.167 | 0.0948  |
| 141 | A | 1.213 | 0.1408 | 268 | C | 0.171 | 0.0785  | 0.23  | 0.0113  |
| 142 | A | 0.939 | 0.1294 | 269 | U | 0.656 | 0.0346  | 1.491 | 0.1640  |
| 143 | G | 0.362 | 0.1430 | 270 | G | 0.673 | 0.1280  | 0.633 | 0.1301  |
| 144 | A | 0.543 | 0.0874 | 271 | G | 0.227 | 0.1096  | 0.312 | 0.1457  |
| 145 | U | 0.533 | 0.2705 | 272 | A | 0.096 | 0.0778  | 0.121 | 0.1230  |
| 146 | C | 0.436 | 0.2199 | 273 | G | 0.659 | 0.0771  | 0.581 | 0.1287  |
| 147 | C | 0.517 | 0.1905 | 274 | A | 0.855 | 0.1619  | 0.793 | 0.0339  |
| 148 | G | 0.361 | 0.1944 | 275 | A | 0.362 | 0.2114  | 0.579 | 0.1803  |
| 149 | U | 0.593 | 0.1915 | 276 | G | 0.26  | 0.0594  | 0.183 | 0.05674 |

|     |   |       |        |     |   |       |         |       |        |
|-----|---|-------|--------|-----|---|-------|---------|-------|--------|
| 150 | U | 0.446 | 0.3053 | 277 | U | 0.459 | 0.0962  | 0.794 | 0.1541 |
| 151 | A | 0.765 | 0.2277 | 278 | U | 0.362 | 0.1626  | 1.044 | 0.0926 |
| 152 | G | 0.571 | 0.2134 | 279 | U | 0.695 | 0.0891  | 2.177 | 0.5664 |
| 153 | A | 0.546 | 0.2116 | 280 | G | -     | 0.0000  | 0.107 | 0.0071 |
| 154 | C | 0.655 | 0.2311 | 281 | A | -     | 0.0000  | 0.173 | 0.0629 |
| 155 | G | 0.411 | 0.1457 | 282 | C | 0.112 | 0.0827  | 0.15  | 0.1082 |
| 156 | U | 0.387 | 0.1241 | 283 | A | 0.123 | 0.0559  | 0.64  | 0.0000 |
| 157 | U | 0.405 | 0.1484 | 284 | C | 0.062 | 0.0000  | 0.082 | 0.0000 |
| 158 | U | 0.174 | 0.0950 | 285 | C | 0.239 | 0.0997  | 0.269 | 0.0000 |
| 159 | C | 0.425 | 0.1608 | 286 | A | 0.51  | 0.0615  | 0.581 | 0.0000 |
| 160 | A | 0.618 | 0.1016 | 287 | A | 0.421 | 0.0000  | 0.619 | 0.0000 |
| 161 | G | 0.068 | 0.0664 | 288 | A | 3.737 | 0.0000  | 3.133 | 0.5706 |
| 162 | C | 0.370 | 0.3815 | 289 | U | 0.683 | 0.1605  | 1.423 | 0.7863 |
| 163 | U | 0.367 | 0.0972 | 290 | U | 0.431 | 0.1725  | 0.95  | 0.6314 |
| 164 | U | 0.317 | 0.1825 | 291 | C | 0.528 | 0.1428  | 1.092 | 0.3649 |
| 165 | C | 0.558 | 0.0692 | 292 | A | 0.694 | 0.0403  | 1.037 | 0.5346 |
| 166 | C | 0.665 | 0.2392 | 293 | A | 0.435 | 0.1648  | 0.921 | 0.3776 |
| 167 | A | 0.487 | 0.2158 | 294 | A | 0.417 | 0.2602  | 0.686 | 0.3627 |
| 168 | A | 0.894 | 0.3048 | 295 | U | 0.069 | 0.0665  | 0.117 | 0.1428 |
| 169 | A | 0.815 | 0.2810 | 296 | U | -     | 0.0000  | 0.084 | 0.0000 |
| 170 | A | 0.929 | 0.1882 | 297 | G | 0.342 | 0.0085  | 0.156 | 0.0332 |
| 171 | C | 0.503 | 0.2207 | 298 | G | 1.329 | 0.0778  | 1.109 | 0.1754 |
| 172 | A | 0.851 | 0.2328 | 299 | U | 0.799 | 0.0629  | 1.124 | 0.0615 |
| 173 | G | 0.841 | 0.2156 | 300 | G | 0.638 | 0.0559  | 0.585 | 0.1697 |
| 174 | A | 0.648 | 0.1500 | 301 | U | -     | 0.0000  | 0.133 | 0.1577 |
| 175 | A | 0.899 | 0.1835 | 302 | U | -     | 0.0000  | 0.173 | 0.0742 |
| 176 | G | 0.287 | 0.1658 | 303 | A | 0.39  | 0.0665  | 0.578 | 0.1061 |
| 177 | A | 0.456 | 0.1162 | 304 | G | 0.154 | 0.0544  | 0.188 | 0.0523 |
| 178 | A | 0.572 | 0.1967 | 305 | G | 0.085 | 0.0134  | 0.082 | 0.0092 |
| 179 | U | 0.461 | 0.1176 | 306 | G | 0.056 | 0.0000  | 0.075 | 0.0311 |
| 180 | G | 0.109 | 0.0321 | 307 | G | 0.241 | 0.0346  | 0.269 | 0.0453 |
| 181 | U | 0.673 | 0.2703 | 308 | A | 0.359 | 0.0891  | 0.595 | 0.0007 |
| 182 | G | 0.344 | 0.1418 | 309 | G | 0.049 | 0.0262  | 0.164 | 0.0240 |
| 183 | A | 0.514 | 0.2072 | 310 | C | -     | 0.0000  | 0.147 | 0.0969 |
| 184 | G | 0.467 | 0.1942 | 311 | U | -     | 0.0000  | 0.519 | 0.1011 |
| 185 | A | 0.227 | 0.0980 | 312 | G | -     | 0.0000  | 0.253 | 0.1485 |
| 186 | A | 0.684 | 0.1663 | 313 | G | 0.976 | 0.0000  | 0.133 | 0.1032 |
| 187 | G | 0.462 | 0.1065 | 314 | G | 0.478 | 0.2659  | 0.744 | 0.0134 |
| 188 | G | 0.137 | 0.0766 | 315 | G | 0.547 | 0.0000  | 0.541 | 0.1513 |
| 189 | C | 0.176 | 0.1070 | 316 | C | 1.845 | 0.0000  | -     | 0.0000 |
| 190 | U | 0.419 | 0.0774 | 317 | C | 1.224 | 0.7658  | 0.791 | 0.0000 |
| 191 | U | 0.085 | 0.0542 | 318 | U | 0.445 | 0.3118  | 0.686 | 0.0919 |
| 192 | C | 0.269 | 0.1220 | 319 | U | 0.133 | 0.1146  | 0.642 | 0.0184 |
| 193 | C | 0.534 | 0.0855 | 320 | U | 0.029 | 0.0000  | 0.23  | 0.1407 |
| 194 | A | 0.672 | 0.1607 | 321 | C | 0.114 | 0.01038 | 0.294 | 0.0269 |
| 195 | C | 0.347 | 0.1475 | 322 | A | 0.343 | 0.4207  | 0.377 | 0.0877 |
| 196 | U | 0.503 | 0.1700 | 323 | A | 0.296 | 0.1506  | 0.584 | 0.5289 |
| 197 | A | 0.407 | 0.0457 | 324 | A | 0.228 | 0.0827  | 0.427 | 0.0629 |
| 198 | A | 0.690 | 0.2003 | 325 | A | 0.119 | 0.1068  | 0.476 | 0.0849 |
| 199 | G | 0.467 | 0.0933 | 326 | G | 0.112 | 0.0290  | 0.254 | 0.1322 |

|     |   |       |        |     |   |       |        |       |        |
|-----|---|-------|--------|-----|---|-------|--------|-------|--------|
| 200 | G | 0.351 | 0.1162 | 327 | A | 0.312 | 0.1428 | 0.332 | 0.1188 |
| 201 | C | 0.015 | 0.0021 | 328 | G |       |        | 0.341 | 0.0212 |
| 202 | U | 0.586 | 0.1434 | 329 | A |       |        | 0.467 | 0.1308 |
| 203 | A | 0.309 | 0.0511 | 330 | G |       |        | 0.269 | 0.0750 |
| 204 | A | 0.672 | 0.1293 | 331 | C |       |        | 0.05  | 0.0219 |
| 205 | C | 0.294 | 0.1265 | 332 | U |       |        | 0.401 | 0.2758 |
| 206 | U | 0.177 | 0.0815 | 333 | U |       |        | 0.347 | 0.1605 |
| 207 | C | 0.750 | 0.3126 | 334 | U |       |        | 0.224 | 0.1428 |
| 208 | U | 0.308 | 0.1330 | 335 | G |       |        | 0.203 | 0.0933 |
| 209 | C | 0.485 | 0.2317 | 336 | U |       |        | 0.071 | 0.0474 |
| 210 | A | 0.629 | 0.2320 | 337 | A |       |        | 0.654 | 0.0283 |
| 211 | A | 0.721 | 0.1916 | 338 | G |       |        | 0.16  | 0.0481 |
| 212 | C | 0.665 | 0.3253 | 339 | A |       |        | 0.207 | 0.1530 |
| 213 | A | 0.778 | 0.2079 | 340 | G |       |        | 0.373 | 0.1810 |
| 214 | G | 1.061 | 0.3167 | 341 | G |       |        | 0.442 | 0.1598 |
| 215 | A | 0.543 | 0.1765 | 342 | C |       |        | 0.131 | 0.0990 |
| 216 | C | 0.490 | 0.1538 | 343 | A |       |        | -     | 0.0000 |
| 217 | A | 1.335 | 0.1248 | 344 | U |       |        | 0.262 | 0.1803 |
| 218 | A | 0.620 | 0.2375 | 345 | U |       |        | -     | 0.0000 |
| 219 | C | 0.723 | 0.2132 | 346 | C |       |        | -     | 0.0000 |
| 220 | A | 1.230 | 0.3716 | 347 | U |       |        | 0.448 | 0.3161 |
| 221 | A | 0.605 | 0.2512 | 348 | U |       |        | 0.26  | 0.2998 |
| 222 | C | 0.429 | 0.1524 | 349 | U |       |        | 0.515 | 0.1506 |
| 223 | A | 0.917 | 0.2078 | 350 | U |       |        | 0.686 | 0.3203 |
| 224 | C | 0.249 | 0.1297 |     |   |       |        |       |        |
| 225 | C | 0.602 | 0.0706 |     |   |       |        |       |        |
| 226 | U | 0.941 | 0.1176 |     |   |       |        |       |        |
| 227 | G | 0.198 | 0.0887 |     |   |       |        |       |        |
| 228 | C | 0.524 | 0.1573 |     |   |       |        |       |        |
| 229 | U | 0.907 | 0.1507 |     |   |       |        |       |        |
| 230 | U | 0.636 | 0.1707 |     |   |       |        |       |        |
| 231 | C | 0.658 | 0.2493 |     |   |       |        |       |        |
| 232 | A | 1.013 | 0.2409 |     |   |       |        |       |        |
| 233 | U | 0.492 | 0.1665 |     |   |       |        |       |        |
| 234 | C | 0.636 | 0.1493 |     |   |       |        |       |        |
| 235 | A | 0.694 | 0.0625 |     |   |       |        |       |        |
| 236 | G | 0.820 | 0.0956 |     |   |       |        |       |        |
| 237 | C | 0.425 | 0.0860 |     |   |       |        |       |        |
| 238 | U | 0.354 | 0.0951 |     |   |       |        |       |        |
| 239 | G | 0.379 | 0.1325 |     |   |       |        |       |        |
| 240 | U | 0.425 | 0.1273 |     |   |       |        |       |        |
| 241 | U | 0.319 | 0.1084 |     |   |       |        |       |        |
| 242 | C | 0.440 | 0.1036 |     |   |       |        |       |        |
| 243 | C | 0.430 | 0.0786 |     |   |       |        |       |        |
| 244 | A | 0.726 | 0.0502 |     |   |       |        |       |        |
| 245 | G | 1.303 | 0.3123 |     |   |       |        |       |        |
| 246 | A | 0.651 | 0.1737 |     |   |       |        |       |        |
| 247 | G | 0.606 | 0.1905 |     |   |       |        |       |        |
| 248 | A | 0.536 | 0.1061 |     |   |       |        |       |        |
| 249 | A | 0.423 | 0.1270 |     |   |       |        |       |        |

|     |   |       |        |
|-----|---|-------|--------|
| 250 | C | 0.230 | 0.0496 |
| 251 | C | 0.304 | 0.0916 |
| 252 | C | -     | 0.0000 |
| 253 | C | -     | 0.0000 |
| 254 | C | -     | 0.0000 |
| 255 | A | 0.747 | 0.0443 |
| 256 | U | 0.398 | 0.0837 |
| 257 | C | 0.650 | 0.0606 |
| 258 | A | 0.262 | 0.0813 |
| 259 | U | 0.686 | 0.0410 |
| 260 | G | 0.243 | 0.0653 |
| 261 | C | 0.184 | 0.0527 |
| 262 | C | 0.306 | 0.1057 |
| 263 | U | 0.104 | 0.0815 |
| 264 | C | 0.496 | 0.0548 |
| 265 | U | 0.382 | 0.1223 |
| 266 | C | 0.382 | 0.0576 |
| 267 | C | 0.677 | 0.1639 |
| 268 | U | 0.292 | 0.0453 |
| 269 | C | 0.163 | 0.0315 |
| 270 | A | 0.671 | 0.0850 |
| 271 | A | 0.796 | 0.1007 |
| 272 | C | 0.252 | 0.0134 |
| 273 | C | -     | 0.0000 |
| 274 | U | -     | 0.0000 |
| 275 | G | -     | 0.0000 |
| 276 | C | 0.319 | 0.0556 |
| 277 | U | 0.116 | 0.0610 |
| 278 | U | 0.634 | 0.1377 |
| 279 | C | 0.531 | 0.1239 |
| 280 | A | 0.368 | 0.1335 |
| 281 | G | 0.347 | 0.1598 |
| 282 | U | 0.499 | 0.1308 |
| 283 | A | 0.534 | 0.2298 |
| 284 | C | 0.121 | 0.1023 |
| 285 | C | 0.528 | 0.1108 |
| 286 | A | 0.156 | 0.0497 |
| 287 | C | 0.045 | 0.0576 |
| 288 | C | 0.412 | 0.0479 |
| 289 | U | 0.292 | 0.0892 |
| 290 | C | 0.418 | 0.0697 |
| 291 | C | 0.617 | 0.1342 |
| 292 | A | 1.337 | 0.1271 |
| 293 | C | -     | 0.0000 |
| 294 | A | -     | 0.0000 |
| 295 | G | 0.524 | 0.2586 |
| 296 | A | 1.095 | 0.1476 |
| 297 | A | 1.130 | 0.2815 |
| 298 | U | 0.488 | 0.1462 |
| 299 | G | 0.383 | 0.1130 |

|     |   |       |        |
|-----|---|-------|--------|
| 300 | G | -     | 0.0000 |
| 301 | G | -     | 0.0000 |
| 302 | C | 0.326 | 0.1461 |
| 303 | C | 0.192 | 0.0246 |
| 304 | G | 0.061 | 0.0042 |
| 305 | U | 0.139 | 0.0516 |
| 306 | A | 0.525 | 0.0505 |
| 307 | C | 0.136 | 0.0368 |
| 308 | C | 0.152 | 0.0312 |
| 309 | C | 0.265 | 0.0128 |
| 310 | A | 0.683 | 0.0835 |
| 311 | C | 0.516 | 0.0708 |
| 312 | A | 0.583 | 0.0320 |
| 313 | G | 0.174 | 0.0395 |
| 314 | C | 0.291 | 0.1319 |
| 315 | A | 0.454 | 0.0814 |
| 316 | G | 0.420 | 0.0348 |
| 317 | U | 0.623 | 0.0398 |
| 318 | G | 0.328 | 0.0671 |
| 319 | C | 0.244 | 0.0550 |
| 320 | A | 0.459 | 0.0488 |
| 321 | U | 0.297 | 0.0397 |
| 322 | G | 0.398 | 0.1111 |
| 323 | A | 0.164 | 0.1476 |
| 324 | U | 0.175 | 0.0773 |
| 325 | G | 0.150 | 0.1512 |
| 326 | A | 0.358 | 0.1883 |
| 327 | C | 0.248 | 0.0436 |
| 328 | C | 0.513 | 0.1271 |
| 329 | C | 0.661 | 0.2944 |
| 330 | A | 0.694 | 0.1655 |
| 331 | A | 0.895 | 0.3313 |
| 332 | A | 0.784 | 0.2232 |
| 333 | A | 0.550 | 0.1299 |
| 334 | C | 0.287 | 0.1345 |
| 335 | C | 0.596 | 0.3099 |
| 336 | A | 0.734 | 0.1343 |
| 337 | A | 0.507 | 0.0758 |
| 338 | G | 0.298 | 0.0925 |
| 339 | C | 0.214 | 0.0851 |
| 340 | C | 0.339 | 0.0636 |
| 341 | A | 0.374 | 0.1884 |
| 342 | A | 0.675 | 0.1373 |
| 343 | U | 0.412 | 0.1485 |
| 344 | C | 0.181 | 0.0793 |
| 345 | C | 0.790 | 0.1187 |
| 346 | A | 0.881 | 0.4590 |
| 347 | U | 0.254 | 0.1871 |
| 348 | C | 0.427 | 0.0812 |
| 349 | U | 0.830 | 0.2215 |

|     |   |       |        |
|-----|---|-------|--------|
| 350 | G | 0.352 | 0.1138 |
| 351 | G | 0.166 | 0.1049 |
| 352 | U | 0.365 | 0.0899 |
| 353 | U | 0.313 | 0.0724 |
| 354 | G | 0.412 | 0.0701 |
| 355 | G | 0.394 | 0.0968 |
| 356 | U | 0.431 | 0.4173 |
| 357 | C | 0.328 | 0.2483 |
| 358 | A | 0.599 | 0.1151 |
| 359 | U | 0.631 | 0.1670 |
| 360 | U | 0.127 | 0.1291 |
| 361 | U | 0.297 | 0.0697 |
| 362 | U | 0.183 | 0.1102 |
| 363 | A | 0.436 | 0.0564 |
| 364 | C | 0.183 | 0.0718 |
| 365 | G | 0.400 | 0.1061 |
| 366 | G | 0.324 | 0.1645 |
| 367 | A | 0.132 | 0.1253 |
| 368 | C | 0.153 | 0.0601 |
| 369 | A | 0.439 | 0.0387 |
| 370 | C | 0.225 | 0.3855 |
| 371 | C | 0.147 | 0.1430 |
| 372 | C | 0.462 | 0.1109 |
| 373 | A | 1.043 | 0.2611 |
| 374 | U | 0.514 | 0.2478 |
| 375 | C | 0.503 | 0.2055 |
| 376 | U | 0.647 | 0.1732 |
| 377 | A | 0.695 | 0.2559 |
| 378 | U | 0.973 | 0.1643 |
| 379 | G | 0.330 | 0.2419 |
| 380 | A | 0.316 | 0.1614 |
| 381 | U | 0.233 | 0.0937 |
| 382 | U | 0.198 | 0.1214 |
| 383 | C | 0.249 | 0.0574 |
| 384 | C | 0.406 | 0.0506 |
| 385 | G | 0.354 | 0.1623 |
| 386 | U | 0.329 | 0.1098 |
| 387 | A | 0.545 | 0.1752 |
| 388 | U | 0.430 | 0.1721 |
| 389 | A | 0.260 | 0.1749 |
| 390 | C | 0.433 | 0.0922 |
| 391 | A | 0.521 | 0.1561 |
| 392 | C | 0.277 | 0.0943 |
| 393 | C | 0.332 | 0.1273 |
| 394 | U | 0.527 | 0.2856 |
| 395 | U | 0.963 | 0.1646 |
| 396 | A | 0.773 | 0.3560 |
| 397 | U | 0.885 | 0.5280 |
| 398 | C | 1.617 | 0.2076 |
| 399 | A | 2.006 | 0.7353 |



|     |   |       |        |
|-----|---|-------|--------|
| 400 | A | 1.324 | 0.6738 |
| 401 | A | 0.723 | 0.4296 |
| 402 | U | 0.412 | 0.2211 |
| 403 | G | 0.423 | 0.1602 |
| 404 | U | 0.183 | 0.1064 |
| 405 | C | 0.376 | 0.0216 |
| 406 | G | 0.495 | 0.0198 |
| 407 | C | 0.209 | 0.0462 |
| 408 | C | 0.235 | 0.0280 |
| 409 | U | 0.565 | 0.0875 |
| 410 | A | 0.724 | 0.0382 |
| 411 | U | 0.326 | 0.0580 |
| 412 | G | 0.384 | 0.0582 |
| 413 | U | 0.251 | 0.0632 |
| 414 | A | 0.642 | 0.0613 |
| 415 | C | 0.345 | 0.0273 |
| 416 | U | 0.309 | 0.0832 |
| 417 | U | 0.634 | 0.0480 |
| 418 | U | 0.334 | 0.0111 |
| 419 | C | 0.038 | 0.0671 |
| 420 | C | 0.464 | 0.0367 |
| 421 | A | 0.289 | 0.1202 |
| 422 | C | 0.441 | 0.0075 |
| 423 | C | 0.918 | 0.2786 |
| 424 | U | 0.490 | 0.3170 |
| 425 | G | 0.531 | 0.1128 |
| 426 | G | 0.628 | 0.2397 |
| 427 | G | 0.192 | 0.2959 |
| 428 | C | 0.471 | 0.1005 |
| 429 | C | 0.457 | 0.1754 |
| 430 | A | 0.381 | 0.0520 |
| 431 | C | 0.232 | 0.0949 |
| 432 | A | 0.763 | 0.0626 |
| 433 | A | 0.378 | 0.0942 |
| 434 | U | 0.393 | 0.0490 |
| 435 | C | 0.284 | 0.0966 |
| 436 | A | 0.561 | 0.0880 |
| 437 | C | 0.509 | 0.1169 |
| 438 | A | 0.831 | 0.0657 |
| 439 | G | 0.439 | 0.1322 |
| 440 | U | 0.049 | 0.0211 |
| 441 | U | 0.424 | 0.0269 |
| 442 | U | 0.506 | 0.0917 |
| 443 | C | 0.230 | 0.1262 |
| 444 | C | 0.267 | 0.1117 |
| 445 | G | 0.620 | 0.0481 |
| 446 | C | 0.437 | 0.0465 |
| 447 | A | 0.641 | 0.1107 |
| 448 | G | 0.092 | 0.0719 |
| 449 | U | 0.278 | 0.0919 |

|     |   |       |        |
|-----|---|-------|--------|
| 450 | A | 0.690 | 0.0782 |
| 451 | U | 0.475 | 0.1029 |
| 452 | C | 0.140 | 0.0703 |
| 453 | C | 0.340 | 0.0590 |
| 454 | A | 1.000 | 0.0296 |
| 455 | U | 0.388 | 0.0438 |
| 456 | C | 0.882 | 0.0528 |
| 457 | A | 0.284 | 0.3345 |
| 458 | U | 0.544 | 0.0119 |
| 459 | C | 0.443 | 0.0726 |
| 460 | A | 0.748 | 0.0575 |
| 461 | G | 0.447 | 0.0869 |
| 462 | U | 0.099 | 0.0408 |
| 463 | U | 0.864 | 0.0341 |
| 464 | G | 0.293 | 0.0481 |
| 465 | G | 0.262 | 0.0335 |
| 466 | A | 0.617 | 0.0991 |
| 467 | A | 0.126 | 0.1223 |
| 468 | C | 0.544 | 0.0217 |
| 469 | G | 0.145 | 0.0809 |
| 470 | C | 0.218 | 0.0255 |
| 471 | C | 0.486 | 0.0265 |
| 472 | U | 0.373 | 0.0677 |
| 473 | C | 0.363 | 0.1299 |
| 474 | U | 0.577 | 0.0374 |
| 475 | G | 0.588 | 0.1080 |
| 476 | A | 0.600 | 0.0723 |
| 477 | G | 0.387 | 0.1857 |
| 478 | C | 0.310 | 0.0851 |
| 479 | A | 0.280 | 0.1426 |
| 480 | C | 0.298 | 0.0958 |
| 481 | U | 0.548 | 0.0474 |
| 482 | C | 0.316 | 0.0520 |
| 483 | C | 0.790 | 0.0651 |
| 484 | A | 0.580 | 0.1413 |
| 485 | U | 0.054 | 0.0235 |
| 486 | C | 0.428 | 0.0247 |
| 487 | A | 0.618 | 0.0771 |
| 488 | C | 0.304 | 0.0663 |
| 489 | C | 0.125 | 0.0629 |
| 490 | U | -     | 0.0000 |
| 491 | G | 0.427 | 0.0989 |
| 492 | A | 0.666 | 0.1131 |
| 493 | G | 0.368 | 0.1359 |
| 494 | U | 0.104 | 0.0539 |
| 495 | C | 0.303 | 0.0549 |
| 496 | A | 0.642 | 0.0219 |
| 497 | G | 0.521 | 0.0542 |
| 498 | G | 0.544 | 0.3448 |
| 499 | U | 0.508 | 0.1980 |

|     |   |       |        |
|-----|---|-------|--------|
| 500 | A | 0.415 | 0.0967 |
| 501 | A | 0.541 | 0.0556 |
| 502 | U | 0.316 | 0.0398 |
| 503 | A | 0.849 | 0.0220 |
| 504 | C | 0.428 | 0.1176 |
| 505 | A | 0.811 | 0.0995 |
| 506 | U | 0.201 | 0.0907 |
| 507 | U | 0.369 | 0.0866 |
| 508 | U | 0.325 | 0.0831 |
| 509 | A | 0.487 | 0.0784 |
| 510 | C | 0.290 | 0.0226 |
| 511 | U | 0.571 | 0.0266 |
| 512 | G | 0.319 | 0.1166 |
| 513 | A | 0.749 | 0.0719 |
| 514 | U | 0.571 | 0.0437 |
| 515 | U | 0.224 | 0.1109 |
| 516 | C | 0.319 | 0.0312 |
| 517 | A | 0.941 | 0.0459 |
| 518 | U | 0.230 | 0.0590 |
| 519 | C | 0.193 | 0.0919 |
| 520 | C | 0.361 | 0.0614 |
| 521 | U | 0.189 | 0.0447 |
| 522 | C | 0.334 | 0.0519 |
| 523 | A | 0.588 | 0.0595 |
| 524 | G | 0.782 | 0.0991 |
| 525 | C | 0.420 | 0.4449 |
| 526 | G | 0.776 | 0.0325 |
| 527 | G | 0.434 | 0.6640 |
| 528 | A | 0.499 | 0.1597 |
| 529 | C | 0.276 | 0.0560 |
| 530 | U | 0.397 | 0.0289 |
| 531 | C | 0.271 | 0.0755 |
| 532 | U | 0.536 | 0.0220 |
| 533 | G | 0.536 | 0.1045 |
| 534 | A | 0.416 | 0.0461 |
| 535 | U | 0.562 | 0.0376 |
| 536 | A | 0.540 | 0.1001 |
| 537 | U | 0.611 | 0.0692 |
| 538 | G | 0.601 | 0.0979 |
| 539 | A | 0.174 | 0.0622 |
| 540 | C | 0.343 | 0.1272 |
| 541 | A | 0.725 | 0.0989 |
| 542 | U | 0.117 | 0.1419 |
| 543 | C | 0.276 | 0.0476 |
| 544 | C | 0.410 | 0.0465 |
| 545 | A | 0.881 | 0.2284 |
| 546 | C | 1.324 | 0.3362 |
| 547 | U | 0.231 | 0.5367 |
| 548 | A | 1.160 | 0.0191 |
| 549 | A | 1.294 | 0.1379 |

|     |   |       |        |
|-----|---|-------|--------|
| 550 | A | 1.164 | 0.1824 |
| 551 | A | 1.070 | 0.2404 |
| 552 | A | 1.102 | 0.3311 |
| 553 | A | 0.550 | 0.2077 |
| 554 | U | 0.714 | 0.1226 |
| 555 | A | 0.584 | 0.1612 |
| 556 | U | 0.608 | 0.0863 |
| 557 | G | 0.278 | 0.1570 |
| 558 | U | 0.419 | 0.1250 |
| 559 | C | 0.483 | 0.0933 |
| 560 | A | 0.261 | 0.1570 |
| 561 | G | 0.554 | 0.0519 |
| 562 | A | 0.248 | 0.1323 |
| 563 | C | 0.167 | 0.0589 |
| 564 | C | 0.618 | 0.0318 |
| 565 | A | 0.267 | 0.1352 |
| 566 | C | 0.171 | 0.1038 |
| 567 | C | -     | 0.0000 |
| 568 | A | 0.739 | 0.0757 |
| 569 | C | 0.366 | 0.0693 |
| 570 | C | 0.238 | 0.0530 |
| 571 | A | 0.591 | 0.1577 |
| 572 | A | 0.829 | 0.0028 |
| 573 | U | 0.545 | 0.1153 |
| 574 | G | 0.681 | 0.1612 |
| 575 | U | 0.498 | 0.1384 |
| 576 | U | 0.473 | 0.0412 |
| 577 | A | 0.959 | 0.0104 |
| 578 | A | 0.574 | 0.2176 |
| 579 | C | 0.329 | 0.1157 |
| 580 | C | 0.375 | 0.0761 |
| 581 | U | 0.105 | 0.1262 |
| 582 | C | 0.431 | 0.0312 |
| 583 | A | 0.683 | 0.0958 |
| 584 | C | 0.380 | 0.1452 |
| 585 | C | 0.598 | 0.0085 |
| 586 | U | 0.603 | 0.1741 |
| 587 | A | 1.256 | 0.1020 |
| 588 | A | 0.593 | 0.3264 |
| 589 | U | 0.818 | 0.0491 |
| 590 | G | 1.070 | 0.2089 |
| 591 | A | 1.316 | 0.3141 |
| 592 | C | 0.396 | 0.2523 |
| 593 | U | 0.973 | 0.2210 |
| 594 | U | 0.731 | 0.2795 |
| 595 | U | 0.721 | 0.2204 |
| 596 | C | 0.396 | 0.0894 |
| 597 | C | 0.574 | 0.0338 |
| 598 | A | 0.819 | 0.1455 |
| 599 | A | 1.195 | 0.2606 |

|     |   |       |        |
|-----|---|-------|--------|
| 600 | A | 1.069 | 0.7571 |
| 601 | U | 0.092 | 0.6082 |
| 602 | U | 0.575 | 0.0788 |
| 603 | G | 0.520 | 0.2920 |
| 604 | G | 0.354 | 0.2765 |
| 605 | G | -     | 0.0000 |
| 606 | U | 1.037 | 0.2291 |
| 607 | U | 0.659 | 0.5688 |
| 608 | A | 0.500 | 0.0745 |
| 609 | A | 0.951 | 0.1513 |
| 610 | A | 1.126 | 0.2072 |
| 611 | A | 0.768 | 0.4544 |
| 612 | C | 0.453 | 0.3981 |
| 613 | A | 0.583 | 0.0911 |
| 614 | U | 0.767 | 0.0648 |
| 615 | A | 0.836 | 0.1731 |
| 616 | C | 0.666 | 0.1260 |
| 617 | A | 0.978 | 0.2327 |
| 618 | U | 0.640 | 0.3903 |
| 619 | C | 0.781 | 0.1635 |
| 620 | A | 1.296 | 0.1731 |
| 621 | A | 1.393 | 0.5720 |
| 622 | A | 1.077 | 0.6732 |
| 623 | U | 0.582 | 0.4745 |
| 624 | U | 0.479 | 0.2305 |
| 625 | U | 0.306 | 0.1278 |
| 626 | U | 0.384 | 0.1060 |
| 627 | U | 0.958 | 0.0366 |
| 628 | A | 1.270 | 0.2132 |
| 629 | C | 0.997 | 0.4115 |
| 630 | A | 0.628 | 0.1876 |
| 631 | A | -     | 0.0000 |
| 632 | A | 1.199 | 0.0764 |
| 633 | A | 1.039 | 0.3321 |
| 634 | C | 0.498 | 0.3152 |
| 635 | U | 0.431 | 0.0896 |
| 636 | C | 0.641 | 0.1129 |
| 637 | G | 0.423 | 0.1485 |
| 638 | A | 1.173 | 0.1026 |
| 639 | A | 1.020 | 0.4384 |
| 640 | U | 0.791 | 0.2027 |
| 641 | C | 0.836 | 0.1724 |
| 642 | U | 0.684 | 0.1942 |
| 643 | C | 0.680 | 0.1152 |
| 644 | G | 0.410 | 0.1799 |
| 645 | G | 0.237 | 0.1025 |
| 646 | U | 0.395 | 0.0987 |
| 647 | G | 0.278 | 0.0986 |
| 648 | G | 0.248 | 0.1087 |
| 649 | U | 0.255 | 0.1097 |

|     |   |       |        |
|-----|---|-------|--------|
| 650 | A | 0.770 | 0.1690 |
| 651 | U | 0.587 | 0.2925 |
| 652 | U | 0.907 | 0.1672 |
| 653 | A | 0.544 | 0.3588 |
| 654 | U | 0.244 | 0.1702 |
| 655 | U | 0.456 | 0.0914 |
| 656 | C | 0.138 | 0.1416 |
| 657 | C | 0.396 | 0.1200 |
| 658 | G | 0.198 | 0.1727 |
| 659 | A | 0.793 | 0.2123 |
| 660 | C | 0.511 | 0.2998 |
| 661 | A | 0.982 | 0.1695 |
| 662 | G | 0.876 | 0.5460 |
| 663 | U | 0.411 | 0.4097 |
| 664 | A | 0.470 | 0.1181 |
| 665 | A | 0.591 | 0.1588 |
| 666 | A | 0.348 | 0.2028 |
| 667 | C | 0.388 | 0.1348 |
| 668 | G | 0.359 | 0.1580 |
| 669 | G | 0.447 | 0.1247 |
| 670 | A | 0.835 | 0.1481 |
| 671 | A | 0.968 | 0.3201 |
| 672 | A | 0.392 | 0.2867 |
| 673 | A | 0.431 | 0.1266 |
| 674 | C | 0.244 | 0.1709 |
| 675 | C | 0.404 | 0.0912 |
| 676 | C | 0.335 | 0.1250 |
| 677 | G | 0.204 | 0.1466 |
| 678 | U | 0.903 | 0.2628 |
| 679 | A | 0.531 | 0.1336 |
| 680 | C | 0.582 | 0.3006 |
| 681 | G | 0.396 | 0.0982 |
| 682 | U | 0.238 | 0.1182 |
| 683 | C | 0.434 | 0.0464 |
| 684 | A | 0.332 | 0.1012 |
| 685 | G | 0.391 | 0.1193 |
| 686 | A | 0.211 | 0.0435 |
| 687 | U | 0.214 | 0.0730 |
| 688 | C | 0.162 | 0.0535 |
| 689 | A | 0.489 | 0.1024 |
| 690 | C | 0.165 | 0.0325 |
| 691 | U | 0.236 | 0.0569 |
| 692 | G | 0.289 | 0.0673 |
| 693 | A | 0.304 | 0.0811 |
| 694 | U | 0.324 | 0.0828 |
| 695 | G | 0.228 | 0.0329 |
| 696 | A | 0.482 | 0.0749 |
| 697 | U | 0.268 | 0.0705 |
| 698 | G | 0.409 | 0.1095 |
| 699 | A | 0.305 | 0.1189 |

|     |   |       |        |
|-----|---|-------|--------|
| 700 | A | 0.491 | 0.1666 |
| 701 | C | 0.346 | 0.0894 |
| 702 | U | 0.163 | 0.1989 |
| 703 | C | 0.364 | 0.1797 |
| 704 | A | 0.394 | 0.1170 |
| 705 | C | 0.186 | 0.1816 |
| 706 | C | 0.370 | 0.0818 |
| 707 | U | 0.386 | 0.2291 |
| 708 | U | 0.341 | 0.0857 |
| 709 | C | 0.346 | 0.1074 |
| 710 | U | 0.415 | 0.1051 |
| 711 | U | 0.436 | 0.1639 |
| 712 | G | 0.328 | 0.1755 |
| 713 | U | 0.392 | 0.1569 |
| 714 | A | 0.463 | 0.1242 |
| 715 | U | 2.251 | 0.4906 |
| 716 | A | 0.568 | 0.1252 |
| 717 | A | 0.963 | 0.2020 |
| 718 | C | 0.316 | 0.0821 |
| 719 | A | 0.476 | 0.0283 |
| 720 | C | 0.360 | 0.0565 |
| 721 | U | 0.245 | 0.0581 |
| 722 | U | 0.567 | 0.0857 |
| 723 | U | 0.368 | 0.1737 |
| 724 | U | 0.485 | 0.1606 |
| 725 | C | 0.978 | 0.2020 |
| 726 | A | 0.726 | 0.4075 |
| 727 | A | 0.840 | 0.1117 |
| 728 | A | 0.707 | 0.0963 |
| 729 | U | 0.531 | 0.0862 |
| 730 | A | 0.705 | 0.0881 |
| 731 | U | 0.246 | 0.0549 |
| 732 | U | 0.631 | 0.1203 |
| 733 | U | 0.414 | 0.0782 |
| 734 | G | 0.196 | 0.1276 |
| 735 | C | 0.319 | 0.0782 |
| 736 | U | 0.621 | 0.1517 |
| 737 | C | 0.135 | 0.0671 |
| 738 | C | 0.306 | 0.0483 |
| 739 | C | 0.522 | 0.2666 |
| 740 | U | 0.865 | 0.2475 |
| 741 | C | 0.681 | 0.0474 |
| 742 | U | 0.824 | 0.2581 |
| 743 | C | 1.007 | 0.4342 |
| 744 | A | 0.723 | 0.3367 |
| 745 | A | 0.620 | 0.1859 |
| 746 | U | 0.634 | 0.2576 |
| 747 | U | 0.682 | 0.2761 |
| 748 | C | 0.173 | 0.1998 |
| 749 | C | 0.274 | 0.0662 |

|     |   |       |        |
|-----|---|-------|--------|
| 750 | U | 0.647 | 0.1020 |
| 751 | A | 0.914 | 0.1833 |
| 752 | C | 0.188 | 0.0759 |
| 753 | C | 0.112 | 0.0770 |
| 754 | U | 0.422 | 0.1223 |
| 755 | A | 0.787 | 0.1708 |
| 756 | C | 0.226 | 0.1418 |
| 757 | C | 0.183 | 0.0495 |
| 758 | U | 0.681 | 0.3062 |
| 759 | G | -     | 0.0000 |
| 760 | G | 1.315 | 0.3239 |
| 761 | G | 0.809 | 0.5331 |
| 762 | U | 0.518 | 0.1929 |
| 763 | C | 0.315 | 0.1317 |
| 764 | A | 0.936 | 0.1350 |
| 765 | A | 0.561 | 0.0229 |
| 766 | A | 0.552 | 0.0673 |
| 767 | G | 0.531 | 0.0726 |
| 768 | A | 0.218 | 0.0608 |
| 769 | C | 0.090 | 0.0095 |
| 770 | A | 0.580 | 0.0710 |
| 771 | U | 0.393 | 0.0251 |
| 772 | C | 0.416 | 0.0822 |
| 773 | C | 0.297 | 0.0864 |
| 774 | U | 0.363 | 0.0904 |
| 775 | A | 0.299 | 0.0296 |
| 776 | U | 0.575 | 0.1308 |
| 777 | C | 0.224 | 0.0344 |
| 778 | C | 0.291 | 0.0270 |
| 779 | G | 0.412 | 0.0996 |
| 780 | U | 0.302 | 0.0907 |
| 781 | U | 0.697 | 0.0962 |
| 782 | G | 0.853 | 0.0890 |
| 783 | A | 1.923 | 0.5346 |
| 784 | U | 1.291 | 0.2394 |
| 785 | U | 0.715 | 0.1339 |
| 786 | A | 0.585 | 0.0756 |
| 787 | U | 0.432 | 0.0743 |
| 788 | A | 0.358 | 0.0907 |
| 789 | C | 0.513 | 0.0789 |
| 790 | G | 0.393 | 0.0140 |
| 791 | G | 0.533 | 0.0896 |
| 792 | A | 0.275 | 0.0491 |
| 793 | U | 0.686 | 0.0639 |
| 794 | A | -     | 0.0000 |
| 795 | U | 0.158 | 0.0490 |
| 796 | C | 0.424 | 0.0312 |
| 797 | A | 0.613 | 0.0427 |
| 798 | U | 0.626 | 0.0206 |
| 799 | G | 0.553 | 0.0268 |



|     |   |       |        |
|-----|---|-------|--------|
| 800 | A | 0.816 | 0.1181 |
| 801 | A | 0.954 | 0.2079 |
| 802 | A | 0.651 | 0.0628 |
| 803 | A | 0.788 | 0.1084 |
| 804 | U | 0.400 | 0.0510 |
| 805 | U | 0.410 | 0.0486 |
| 806 | C | 0.192 | 0.1298 |
| 807 | U | 0.297 | 0.0186 |
| 808 | U | 0.321 | 0.0214 |
| 809 | U | 0.617 | 0.0757 |
| 810 | C | 0.625 | 0.1406 |
| 811 | C | 0.616 | 0.0863 |
| 812 | A | 0.855 | 0.0268 |
| 813 | A | 1.335 | 0.1201 |
| 814 | A | 1.324 | 0.1855 |
| 815 | A | 1.280 | 0.1424 |
| 816 | G | 0.462 | 0.0503 |
| 817 | U | 0.358 | 0.0856 |
| 818 | A | 1.060 | 0.4122 |
| 819 | U | 0.596 | 0.0374 |
| 820 | U | 0.900 | 0.0293 |
| 821 | G | 0.602 | 0.2000 |
| 822 | A | 0.997 | 0.1625 |
| 823 | A | 1.099 | 0.1443 |
| 824 | A | 1.062 | 0.1873 |
| 825 | A | 0.893 | 0.0638 |
| 826 | A | 0.857 | 0.0570 |
| 827 | A | 0.885 | 0.1316 |
| 828 | U | 0.817 | 0.1667 |
| 829 | G | 0.556 | 0.0638 |
| 830 | C | 0.530 | 0.1204 |
| 831 | A | 1.020 | 0.2722 |
| 832 | A | 0.771 | 0.1041 |
| 833 | U | 0.477 | 0.1030 |
| 834 | C | 0.409 | 0.1335 |
| 835 | U | 0.945 | 0.1669 |
| 836 | G | 0.804 | 0.2007 |
| 837 | A | 0.444 | 0.0481 |
| 838 | U | 0.637 | 0.1722 |
| 839 | A | 0.801 | 0.3879 |
| 840 | C | 0.418 | 0.4021 |
| 841 | C | 0.271 | 0.1598 |
| 842 | C | 0.526 | 0.1697 |
| 843 | A | 0.491 | 0.0762 |
| 844 | A | 0.716 | 0.1213 |
| 845 | G | 0.282 | 0.0777 |
| 846 | A | 0.712 | 0.1757 |
| 847 | G | 0.582 | 0.0915 |
| 848 | G | 0.728 | 0.0368 |
| 849 | C | 0.391 | 0.0637 |

|     |   |       |        |
|-----|---|-------|--------|
| 850 | A | 0.544 | 0.0494 |
| 851 | A | 1.123 | 0.0767 |
| 852 | A | 0.606 | 0.0617 |
| 853 | C | 0.617 | 0.0886 |
| 854 | G | 0.534 | 0.1552 |
| 855 | A | 0.434 | 0.0490 |
| 856 | C | 0.211 | 0.0521 |
| 857 | A | 0.915 | 0.1000 |
| 858 | U | 0.550 | 0.0408 |
| 859 | U | 1.254 | 0.0148 |
| 860 | G | 0.290 | 0.0471 |
| 861 | U | 0.346 | 0.0715 |
| 862 | G | 0.386 | 0.0802 |
| 863 | A | 0.681 | 0.1025 |
| 864 | C | 0.153 | 0.0076 |
| 865 | C | 0.208 | 0.0395 |
| 866 | C | 0.798 | 0.2079 |
| 867 | U | -     | 0.0000 |
| 868 | G | -     | 0.0000 |
| 869 | G | -     | 0.0000 |
| 870 | C | -     | 0.0000 |
| 871 | A | 0.936 | 0.1197 |
| 872 | A | 0.946 | 0.0890 |
| 873 | A | 0.589 | 0.2451 |
| 874 | U | 0.536 | 0.1731 |
| 875 | U | 0.554 | 0.1511 |
| 876 | U | 0.533 | 0.1151 |
| 877 | G | 0.493 | 0.1192 |
| 878 | C | 0.333 | 0.1136 |
| 879 | A | 0.766 | 0.0864 |
| 880 | A | 0.995 | 0.0286 |
| 881 | U | 0.651 | 0.0539 |
| 882 | A | 1.471 | 0.1909 |
| 883 | U | 0.396 | 0.0973 |
| 884 | A | 1.136 | 0.0912 |
| 885 | A | 0.915 | 0.1166 |
| 886 | U | 0.739 | 0.0417 |
| 887 | G | 0.555 | 0.0743 |
| 888 | G | 0.141 | 0.0327 |
| 889 | C | 0.529 | 0.1287 |
| 890 | A | 0.440 | 0.0868 |
| 891 | G | 0.487 | 0.0881 |
| 892 | U | 1.059 | 0.2909 |
| 893 | A | 0.307 | 0.1713 |
| 894 | C | 0.329 | 0.0644 |
| 895 | A | 0.569 | 0.0728 |
| 896 | C | 0.224 | 0.0732 |
| 897 | C | 0.289 | 0.0913 |
| 898 | U | 0.364 | 0.0294 |
| 899 | G | 0.118 | 0.0299 |

|     |   |       |        |
|-----|---|-------|--------|
| 900 | C | 0.181 | 0.0452 |
| 901 | A | 0.589 | 0.0959 |
| 902 | G | 0.341 | 0.0722 |
| 903 | A | 0.452 | 0.0726 |
| 904 | U | 0.479 | 0.0323 |
| 905 | G | 0.254 | 0.0810 |
| 906 | C | 0.334 | 0.0444 |
| 907 | A | 0.224 | 0.0774 |
| 908 | U | 0.316 | 0.0710 |
| 909 | U | 0.210 | 0.0405 |
| 910 | U | 0.567 | 0.0537 |
| 911 | G | 0.356 | 0.0431 |
| 912 | A | 0.577 | 0.0956 |
| 913 | A | 0.831 | 0.1160 |
| 914 | A | 0.962 | 0.0604 |
| 915 | C | 0.431 | 0.0466 |
| 916 | A | 0.660 | 0.2075 |
| 917 | A | 1.107 | 0.1110 |
| 918 | A | 0.678 | 0.1354 |
| 919 | A | 0.870 | 0.1036 |
| 920 | G | 0.427 | 0.1005 |
| 921 | U | 0.372 | 0.0632 |
| 922 | C | 0.451 | 0.0952 |
| 923 | A | 0.687 | 0.1363 |
| 924 | C | 0.381 | 0.0817 |
| 925 | A | 0.643 | 0.1572 |
| 926 | A | 0.830 | 0.1831 |
| 927 | A | 0.781 | 0.1215 |
| 928 | C | 0.365 | 0.0520 |
| 929 | A | 0.891 | 0.1126 |
| 930 | U | 0.093 | 0.0021 |
| 931 | U | 0.309 | 0.0686 |
| 932 | A | 0.906 | 0.0495 |
| 933 | U | 0.225 | 0.1032 |
| 934 | C | 0.403 | 0.0897 |
| 935 | G | 0.275 | 0.0675 |
| 936 | A | 0.473 | 0.0779 |
| 937 | C | 0.267 | 0.0045 |
| 938 | A | 0.545 | 0.0905 |
| 939 | G | 0.372 | 0.0666 |
| 940 | A | 0.366 | 0.1115 |
| 941 | C | 0.237 | 0.0320 |
| 942 | U | 0.273 | 0.0318 |
| 943 | G | 0.267 | 0.0236 |
| 944 | A | 0.375 | 0.0438 |
| 945 | A | 0.400 | 0.0423 |
| 946 | C | 0.240 | 0.0218 |
| 947 | A | 0.484 | 0.0485 |
| 948 | A | 0.485 | 0.0531 |
| 949 | U | 0.280 | 0.1040 |

|     |   |       |        |
|-----|---|-------|--------|
| 950 | A | 0.621 | 0.0727 |
| 951 | A | 0.411 | 0.0575 |
| 952 | U | 0.417 | 0.0465 |
| 953 | G | 0.360 | 0.0090 |
| 954 | G | 0.160 | 0.0430 |
| 955 | C | 0.246 | 0.0862 |
| 956 | A | 0.514 | 0.1115 |
| 957 | U | 0.383 | 0.0662 |
| 958 | U | 0.310 | 0.0336 |
| 959 | C | 0.415 | 0.0472 |
| 960 | A | 0.294 | 0.0465 |
| 961 | U | 0.254 | 0.0307 |
| 962 | A | 0.464 | 0.0434 |
| 963 | U | 0.351 | 0.0840 |
| 964 | C | 0.313 | 0.1069 |
| 965 | A | 0.575 | 0.0817 |
| 966 | A | 0.452 | 0.0399 |
| 967 | U | 0.293 | 0.1186 |
| 968 | A | 0.576 | 0.1293 |
| 969 | A | 0.480 | 0.0849 |
| 970 | C | 0.227 | 0.1253 |
| 971 | A | 0.462 | 0.1607 |
| 972 | A | 0.340 | 0.0255 |
| 973 | G | 0.276 | 0.0163 |
| 974 | G | 0.202 | 0.0303 |
| 975 | U | 0.186 | 0.0353 |
| 976 | C | 0.284 | 0.1291 |
| 977 | G | 0.156 | 0.0354 |
| 978 | C | 0.178 | 0.0267 |
| 979 | A | 0.220 | 0.0587 |
| 980 | U | 0.310 | 0.1117 |
| 981 | G | 0.200 | 0.2071 |
| 982 | C | 1.090 | 0.5089 |
| 983 | C | 0.877 | 0.1920 |
| 984 | A | 0.583 | 0.1351 |
| 985 | A | 0.423 | 0.0170 |
| 986 | U | 0.265 | 0.0396 |
| 987 | U | 0.280 | 0.0276 |
| 988 | A | 0.670 | 0.2164 |
| 989 | A | 0.602 | 0.0460 |
| 990 | U | 0.424 | 0.0820 |
| 991 | U | 0.471 | 0.1294 |
| 992 | A | 0.540 | 0.3988 |
| 993 | U | 0.387 | 0.3316 |
| 994 | G | 0.386 | 0.4731 |
| 995 | A | 0.200 | 0.1888 |
| 996 | G | 0.321 | 0.5218 |
| 997 | A | 0.237 | 0.1994 |
| 998 | G | 0.396 | 0.0555 |
| 999 | G | 0.107 | 0.0304 |

|      |   |       |        |
|------|---|-------|--------|
| 1000 | U | 0.069 | 0.1342 |
| 1001 | C | 0.225 | 0.4510 |
| 1002 | U | 1.242 | 0.4179 |
| 1003 | A | 0.262 | 0.1963 |
| 1004 | U | 0.036 | 0.2949 |
| 1005 | C | 0.108 | 0.2668 |
| 1006 | U | 0.185 | 0.0838 |
| 1007 | G | 0.342 | 0.5202 |
| 1008 | G | 1.315 | 0.5305 |
| 1009 | C | 0.266 | 0.1080 |
| 1010 | G | 0.097 | 0.1260 |
| 1011 | A | 0.060 | 0.0770 |
| 1012 | A | 0.152 | 0.1042 |
| 1013 | U | 0.088 | 0.1940 |
| 1014 | A | 0.084 | 0.1823 |
| 1015 | U | 0.122 | 0.0225 |
| 1016 | A | 0.153 | 0.2165 |
| 1017 | A | 0.627 | 0.3174 |
| 1018 | A | 0.830 | 0.3728 |
| 1019 | U | 0.589 | 0.3718 |
| 1020 | U | 0.457 | 0.4907 |
| 1021 | U | 0.611 | 0.4914 |
| 1022 | U | 0.269 | 0.2143 |
| 1023 | U | 0.591 | 0.4879 |
| 1024 | A | 0.510 | 0.2489 |
| 1025 | C | 0.547 | 0.2242 |
| 1026 | G | 0.074 | 0.0813 |
| 1027 | C | 0.353 | 0.1527 |
| 1028 | U | 0.623 | 0.5353 |
| 1029 | A | 0.884 | 0.4052 |
| 1030 | C | 0.612 | 0.3726 |
| 1031 | A | 0.226 | 0.1541 |
| 1032 | C | 1.074 | 0.7863 |
| 1033 | A | 0.632 | 0.4426 |
| 1034 | C | 0.633 | 0.3882 |
| 1035 | G | 0.413 | 0.0771 |
| 1036 | U | 0.111 | 0.0516 |
| 1037 | C | 0.046 | 0.0325 |
| 1038 | A | 0.489 | 0.0615 |
| 1039 | U | 0.088 | 0.0269 |
| 1040 | C | 0.273 | 0.0926 |
| 1041 | G | 0.549 | 0.1004 |
| 1042 | A | 0.247 | 0.1082 |
| 1043 | C | 2.110 | 0.8591 |
| 1044 | A | 0.841 | 0.3041 |
| 1045 | U | 0.165 | 0.0509 |
| 1046 | C | 0.091 | 0.0587 |
| 1047 | U | 0.243 | 0.0983 |
| 1048 | A | 0.480 | 0.1584 |
| 1049 | A | 0.552 | 0.2708 |

|      |   |       |        |
|------|---|-------|--------|
| 1050 | A | 0.273 | 0.1329 |
| 1051 | U | 0.307 | 0.1259 |
| 1052 | A | 0.364 | 0.1054 |
| 1053 | U | 0.428 | 0.1435 |
| 1054 | G | 0.016 | 0.0156 |
| 1055 | A | 0.512 | 0.1916 |
| 1056 | C | 0.083 | 0.0283 |
| 1057 | A | 0.300 | 0.0445 |
| 1058 | G | 0.238 | 0.0665 |
| 1059 | U | 0.197 | 0.0933 |
| 1060 | C | 0.947 | 0.4172 |
| 1061 | G | 0.264 | 0.1174 |
| 1062 | C | 0.461 | 0.2737 |
| 1063 | U | 0.122 | 0.1230 |
| 1064 | G | 0.251 | 0.1075 |
| 1065 | A | 0.283 | 0.2539 |
| 1066 | A | 0.763 | 0.1761 |
| 1067 | C | 0.850 | 0.2737 |
| 1068 | U | -     | 0.0000 |
| 1069 | G | -     | 0.0000 |
| 1070 | U | -     | 0.0000 |
| 1071 | U | 0.043 | 0.0134 |
| 1072 | C | 0.229 | 0.1831 |
| 1073 | U | 0.289 | 0.0728 |
| 1074 | U | 0.450 | 0.2744 |
| 1075 | A | 0.662 | 0.3210 |
| 1076 | G | 0.440 | 0.2263 |
| 1077 | A | 0.173 | 0.0877 |
| 1078 | U | 0.185 | 0.1301 |
| 1079 | A | 0.515 | 0.2369 |
| 1080 | U | 0.132 | 0.0544 |
| 1081 | C | -     | 0.0000 |
| 1082 | C | -     | 0.0000 |
| 1083 | A | 0.335 | 0.1435 |
| 1084 | U | 0.242 | 0.1577 |
| 1085 | G | 0.308 | 0.0750 |
| 1086 | C | 0.863 | 0.1147 |
| 1087 | U | 0.277 | 0.0387 |
| 1088 | A | 0.709 | 0.0894 |
| 1089 | U | 0.184 | 0.0906 |
| 1090 | U | 0.070 | 0.0106 |
| 1091 | U | 0.501 | 0.2217 |
| 1092 | A | 0.443 | 0.0983 |
| 1093 | U | 0.256 | 0.0709 |
| 1094 | G | 0.285 | 0.1603 |
| 1095 | A | 0.699 | 0.1016 |
| 1096 | A | 0.410 | 0.1286 |
| 1097 | G | 0.498 | 0.0765 |
| 1098 | A | 0.597 | 0.0848 |
| 1099 | A | 0.156 | 0.0347 |

|      |   |       |        |
|------|---|-------|--------|
| 1100 | C | 0.195 | 0.0432 |
| 1101 | A | 0.230 | 0.0185 |
| 1102 | A | 0.204 | 0.0327 |
| 1103 | C | 0.147 | 0.0535 |
| 1104 | A | 0.378 | 0.0590 |
| 1105 | G | 0.911 | 0.1814 |
| 1106 | G | 1.059 | 0.2382 |
| 1107 | G | 4.097 | 0.7250 |
| 1108 | A | 2.059 | 0.2021 |
| 1109 | U | 0.116 | 0.0834 |
| 1110 | C | 0.610 | 0.0512 |
| 1111 | G | 0.213 | 0.0820 |
| 1112 | A | 2.027 | 0.1397 |
| 1113 | G | 0.497 | 0.2082 |
| 1114 | A | 0.348 | 0.0579 |
| 1115 | A | 0.263 | 0.0876 |
| 1116 | A | 1.212 | 0.3199 |
| 1117 | C | 2.063 | 0.2494 |
| 1118 | A | 1.062 | 0.0699 |
| 1119 | G | 0.682 | 0.1645 |
| 1120 | U | 0.323 | 0.0446 |
| 1121 | A | 0.054 | 0.0057 |
| 1122 | A | 0.382 | 0.1216 |
| 1123 | A | 0.330 | 0.0305 |
| 1124 | C | 0.242 | 0.0155 |
| 1125 | C | 0.668 | 0.1076 |
| 1126 | U | 0.424 | 0.2703 |
| 1127 | A | 0.630 | 0.1646 |
| 1128 | A | 0.105 | 0.0875 |
| 1129 | U | 0.157 | 0.0266 |
| 1130 | U | 0.564 | 0.2212 |
| 1131 | A | 0.252 | 0.1253 |
| 1132 | C | 0.084 | 0.0495 |
| 1133 | A | 0.449 | 0.1370 |
| 1134 | G | 2.144 | 0.2484 |
| 1135 | G | 1.955 | 0.5857 |
| 1136 | A | 2.136 | 0.3644 |
| 1137 | G | 0.750 | 0.1781 |
| 1138 | A | 0.123 | 0.0315 |
| 1139 | A | 0.289 | 0.0834 |
| 1140 | A | 0.106 | 0.0150 |
| 1141 | U | 0.202 | 0.0216 |
| 1142 | C | 0.059 | 0.0511 |
| 1143 | C | 0.476 | 0.2662 |
| 1144 | G | 0.285 | 0.1881 |
| 1145 | A | 1.357 | 0.3145 |
| 1146 | G | 0.817 | 0.2609 |
| 1147 | U | 0.688 | 0.1833 |
| 1148 | G | 0.819 | 0.3935 |
| 1149 | A | -     | 0.0000 |

|      |   |       |        |
|------|---|-------|--------|
| 1150 | U | -     | 0.0000 |
| 1151 | G | 0.814 | 0.4130 |
| 1152 | A | 0.280 | 0.1626 |
| 1153 | G | 0.234 | 0.1464 |
| 1154 | A | 0.337 | 0.0704 |
| 1155 | A | 0.321 | 0.2061 |
| 1156 | G | 0.186 | 0.1767 |
| 1157 | A | 0.461 | 0.0495 |
| 1158 | A | 0.403 | 0.0482 |
| 1159 | U | 0.454 | 0.2602 |
| 1160 | G | 0.228 | 0.0631 |
| 1161 | A | 0.238 | 0.1358 |
| 1162 | U | 0.128 | 0.0650 |
| 1163 | U | 0.150 | 0.0984 |
| 1164 | C | 0.189 | 0.1075 |
| 1165 | U | 0.207 | 0.0699 |
| 1166 | C | 0.156 | 0.0812 |
| 1167 | G | 0.213 | 0.0968 |
| 1168 | C | 0.246 | 0.0529 |
| 1169 | A | 0.247 | 0.1872 |
| 1170 | G | 0.160 | 0.1279 |
| 1171 | C | 0.226 | 0.0463 |
| 1172 | U | 0.188 | 0.1180 |
| 1173 | A | 0.334 | 0.3157 |
| 1174 | U | 0.865 | 0.9436 |
| 1175 | A | 1.673 | 0.8695 |
| 1176 | C | 1.438 | 0.7701 |
| 1177 | G | 1.110 | 0.3209 |
| 1178 | A | 1.069 | 0.0926 |
| 1179 | A | 0.807 | 0.1887 |
| 1180 | U | 0.614 | 0.4658 |
| 1181 | A | 0.299 | 0.0778 |
| 1182 | C | 0.405 | 0.2593 |
| 1183 | A | 0.617 | 0.0759 |
| 1184 | A | 0.498 | 0.1762 |
| 1185 | C | 0.559 | 0.3587 |
| 1186 | C | 0.686 | 0.0228 |
| 1187 | A | 0.578 | 0.1741 |
| 1188 | A | 0.704 | 0.0762 |
| 1189 | A | 0.544 | 0.1328 |
| 1190 | C | 0.267 | 0.0411 |
| 1191 | C | 0.234 | 0.0306 |
| 1192 | C | 0.362 | 0.2832 |
| 1193 | A | 0.900 | 0.0856 |
| 1194 | A | 1.037 | 0.1675 |
| 1195 | A | 1.008 | 0.3160 |
| 1196 | G | 0.534 | 0.2729 |
| 1197 | U | 0.461 | 0.1343 |
| 1198 | U | 0.478 | 0.2261 |
| 1199 | A | 0.370 | 0.1301 |



|      |   |       |        |
|------|---|-------|--------|
| 1200 | U | 0.506 | 0.1279 |
| 1201 | A | 0.343 | 0.2661 |
| 1202 | G | 0.107 | 0.0748 |
| 1203 | C | 0.144 | 0.1195 |
| 1204 | U | 0.327 | 0.0540 |
| 1205 | C | 0.348 | 0.0963 |
| 1206 | G | 0.313 | 0.1595 |
| 1207 | G | 0.263 | 0.0779 |
| 1208 | A | 0.191 | 0.0757 |
| 1209 | A | 0.232 | 0.1602 |
| 1210 | U | 0.049 | 0.7814 |
| 1211 | C | 0.461 | 0.5381 |
| 1212 | C | 0.353 | 0.1546 |
| 1213 | U | 0.560 | 0.3474 |
| 1214 | C | 0.156 | 0.0599 |
| 1215 | A | 0.429 | 0.0866 |
| 1216 | A | 0.575 | 0.1844 |
| 1217 | A | 0.712 | 0.1368 |
| 1218 | A | 1.015 | 0.0580 |
| 1219 | A | 0.842 | 0.2771 |
| 1220 | A | 0.474 | 0.0356 |
| 1221 | C | 0.470 | 0.0421 |
| 1222 | A | 0.546 | 0.1022 |
| 1223 | A | 0.651 | 0.1316 |
| 1224 | A | 0.561 | 0.2359 |
| 1225 | U | 0.884 | 0.2963 |
| 1226 | A | 0.554 | 0.1768 |
| 1227 | A | 0.669 | 0.0959 |
| 1228 | U | 0.480 | 0.0721 |
| 1229 | U | 0.428 | 0.0749 |
| 1230 | C | 0.287 | 0.1699 |
| 1231 | G | 0.485 | 0.1383 |
| 1232 | A | 0.458 | 0.2672 |
| 1233 | A | 0.781 | 0.0115 |
| 1234 | A | 0.447 | 0.1300 |
| 1235 | U | 0.299 | 0.0940 |
| 1236 | C | 0.381 | 0.1658 |
| 1237 | G | 0.394 | 0.1222 |
| 1238 | A | 0.411 | 0.1869 |
| 1239 | A | 0.599 | 0.0404 |
| 1240 | A | 0.661 | 0.0410 |
| 1241 | A | 0.418 | 0.0637 |
| 1242 | C | 0.378 | 0.0538 |
| 1243 | A | 0.907 | 0.2035 |
| 1244 | G | 0.046 | 0.0370 |
| 1245 | C | 0.180 | 0.2503 |
| 1246 | C | 0.423 | 0.0966 |
| 1247 | A | 0.452 | 0.1289 |
| 1248 | G | 0.565 | 0.2786 |
| 1249 | G | 0.327 | 0.0661 |

|      |   |       |        |
|------|---|-------|--------|
| 1250 | G | -     | 0.0000 |
| 1251 | C | 0.075 | 0.0376 |
| 1252 | U | 0.293 | 0.0796 |
| 1253 | C | 0.399 | 0.0790 |
| 1254 | A | 0.380 | 0.1012 |
| 1255 | C | 0.174 | 0.0784 |
| 1256 | A | 0.701 | 0.0615 |
| 1257 | A | 0.612 | 0.0095 |
| 1258 | U | 0.516 | 0.0316 |
| 1259 | G | 0.140 | 0.1152 |
| 1260 | U | 0.162 | 0.0263 |
| 1261 | A | 0.658 | 0.0895 |
| 1262 | U | 0.283 | 0.0373 |
| 1263 | C | 0.145 | 0.0730 |
| 1264 | C | 0.526 | 0.1038 |
| 1265 | A | 0.183 | 0.0711 |
| 1266 | C | -     | 0.0000 |
| 1267 | A | 0.677 | 0.2767 |
| 1268 | U | 0.309 | 0.0810 |
| 1269 | C | 0.412 | 0.1131 |
| 1270 | U | 0.776 | 0.0332 |
| 1271 | A | 1.298 | 0.0191 |
| 1272 | A | 0.702 | 0.0785 |
| 1273 | U | 0.790 | 0.0399 |
| 1274 | A | 0.796 | 0.0679 |
| 1275 | A | 0.972 | 0.1909 |
| 1276 | C | 0.114 | 0.0122 |
| 1277 | U | 0.248 | 0.0609 |
| 1278 | C | 0.274 | 0.0721 |
| 1279 | U | 0.335 | 0.0907 |
| 1280 | C | 0.152 | 0.0176 |
| 1281 | C | 0.225 | 0.0814 |
| 1282 | C | 0.851 | 0.0780 |
| 1283 | A | 0.551 | 0.0344 |
| 1284 | G | 0.163 | 0.0465 |
| 1285 | C | 0.367 | 0.0545 |
| 1286 | A | 0.919 | 0.0330 |
| 1287 | C | 0.291 | 0.1378 |
| 1288 | G | -     | 0.0000 |
| 1289 | G | 0.696 | 0.0637 |
| 1290 | A | 0.140 | 0.0223 |
| 1291 | C | 0.309 | 0.0365 |
| 1292 | A | 0.872 | 0.0423 |
| 1293 | A | 0.905 | 0.0676 |
| 1294 | C | 0.802 | 0.1738 |
| 1295 | G | 0.559 | 0.0701 |
| 1296 | A | 0.550 | 0.0384 |
| 1297 | U | 0.481 | 0.0268 |
| 1298 | U | 0.502 | 0.0330 |
| 1299 | C | 0.069 | 0.0214 |

|      |   |       |        |
|------|---|-------|--------|
| 1300 | C | 0.444 | 0.0711 |
| 1301 | A | 0.582 | 0.0455 |
| 1302 | U | 2.088 | 0.0898 |
| 1303 | C | 2.496 | 1.3397 |
| 1304 | A | 2.509 | 1.1175 |
| 1305 | G | 0.797 | 0.5394 |
| 1306 | U | 0.429 | 0.2107 |
| 1307 | A | 0.438 | 0.1453 |
| 1308 | A | 0.738 | 0.1507 |
| 1309 | A | 1.086 | 0.1792 |
| 1310 | U | 0.123 | 0.0501 |
| 1311 | C | 0.591 | 0.0949 |
| 1312 | A | 0.932 | 0.0662 |
| 1313 | A | 0.232 | 0.0174 |
| 1314 | C | 0.553 | 0.0557 |
| 1315 | U | 0.259 | 0.0594 |
| 1316 | A | 0.717 | 0.0499 |
| 1317 | C | 0.328 | 0.0972 |
| 1318 | U | 0.321 | 0.0100 |
| 1319 | G | 0.385 | 0.2141 |
| 1320 | A | 0.380 | 0.0355 |
| 1321 | A | 0.597 | 0.0250 |
| 1322 | C | 0.252 | 0.0420 |
| 1323 | C | 0.503 | 0.0783 |
| 1324 | G | 0.208 | 0.0167 |
| 1325 | A | 0.683 | 0.0725 |
| 1326 | U | 0.523 | 0.0563 |
| 1327 | U | 0.302 | 0.0669 |
| 1328 | C | 0.427 | 0.0527 |
| 1329 | A | 0.397 | 0.1105 |
| 1330 | A | 0.560 | 0.0730 |
| 1331 | U | 0.629 | 0.1308 |
| 1332 | U | 0.614 | 0.1171 |
| 1333 | G | 0.668 | 0.1293 |
| 1334 | A | 0.856 | 0.1172 |
| 1335 | A | 0.927 | 0.0201 |
| 1336 | C | 0.596 | 0.1100 |
| 1337 | A | 0.727 | 0.0800 |
| 1338 | A | 0.794 | 0.0901 |
| 1339 | U | 0.385 | 0.0437 |
| 1340 | A | 1.097 | 0.0438 |
| 1341 | A | 0.423 | 0.0823 |
| 1342 | G | 0.105 | 0.0456 |
| 1343 | C | 0.463 | 0.0647 |
| 1344 | A | 0.455 | 0.1477 |
| 1345 | C | 0.309 | 0.0318 |
| 1346 | G | 0.190 | 0.0562 |
| 1347 | A | 0.531 | 0.0596 |
| 1348 | C | 0.237 | 0.0051 |
| 1349 | C | 0.266 | 0.0368 |

|      |   |       |        |
|------|---|-------|--------|
| 1350 | U | 0.639 | 0.0442 |
| 1351 | U | 0.349 | 0.0741 |
| 1352 | C | 0.708 | 0.1510 |
| 1353 | A | 1.149 | 0.1110 |
| 1354 | U | 0.553 | 0.1398 |
| 1355 | C | 0.367 | 0.1591 |
| 1356 | U | 0.327 | 0.1570 |
| 1357 | U | 0.241 | 0.1188 |
| 1358 | A | 0.353 | 0.1295 |
| 1359 | G | 0.293 | 0.1358 |
| 1360 | G | 0.122 | 0.0340 |
| 1361 | C | 0.263 | 0.0601 |
| 1362 | C | 0.243 | 0.0261 |
| 1363 | A | 0.816 | 0.0976 |
| 1364 | G | 0.289 | 0.0547 |
| 1365 | A | 0.569 | 0.0892 |
| 1366 | A | 0.657 | 0.0770 |
| 1367 | A | 0.568 | 0.1160 |
| 1368 | C | 0.081 | 0.0375 |
| 1369 | U | 0.274 | 0.0423 |
| 1370 | U | 0.186 | 0.0240 |
| 1371 | A | 0.474 | 0.0871 |
| 1372 | C | 0.205 | 0.0437 |
| 1373 | U | 0.415 | 0.0930 |
| 1374 | G | 0.275 | 0.1097 |
| 1375 | A | 0.336 | 0.0605 |
| 1376 | A | 0.680 | 0.1523 |
| 1377 | U | 0.192 | 0.0340 |
| 1378 | C | 0.074 | 0.0265 |
| 1379 | U | 0.225 | 0.0191 |
| 1380 | A | 0.449 | 0.0507 |
| 1381 | C | 0.256 | 0.0183 |
| 1382 | A | 0.344 | 0.0772 |
| 1383 | G | 0.290 | 0.0684 |
| 1384 | U | 0.342 | 0.0605 |
| 1385 | A | 0.370 | 0.0528 |
| 1386 | A | 0.626 | 0.0960 |
| 1387 | A | 0.601 | 0.0941 |
| 1388 | U | 0.353 | 0.0427 |
| 1389 | C | 0.321 | 0.0741 |
| 1390 | A | 0.760 | 0.1592 |
| 1391 | U | 0.465 | 0.0179 |
| 1392 | A | 0.707 | 0.1420 |
| 1393 | C | 0.333 | 0.0243 |
| 1394 | U | 0.326 | 0.0457 |
| 1395 | A | 0.924 | 0.1830 |
| 1396 | A | 0.760 | 0.1334 |
| 1397 | U | 0.353 | 0.0691 |
| 1398 | C | 0.327 | 0.0785 |
| 1399 | A | 0.588 | 0.1288 |

|      |   |       |        |
|------|---|-------|--------|
| 1400 | U | 0.356 | 0.0422 |
| 1401 | U | 0.396 | 0.0718 |
| 1402 | C | 0.155 | 0.0628 |
| 1403 | U | 0.287 | 0.0304 |
| 1404 | G | 0.306 | 0.0584 |
| 1405 | A | 0.262 | 0.0476 |
| 1406 | U | 0.296 | 0.0456 |
| 1407 | G | 0.170 | 0.0689 |
| 1408 | A | 0.493 | 0.1046 |
| 1409 | U | 0.249 | 0.0644 |
| 1410 | G | 0.484 | 0.1257 |
| 1411 | A | 0.387 | 0.0841 |
| 1412 | A | 0.338 | 0.1350 |
| 1413 | C | 0.146 | 0.0438 |
| 1414 | U | 0.266 | 0.0907 |
| 1415 | C | 0.167 | 0.0533 |
| 1416 | C | 0.116 | 0.0261 |
| 1417 | C | 0.735 | 0.4039 |
| 1418 | U | 0.596 | 0.2579 |
| 1419 | G | 0.406 | 0.1357 |
| 1420 | G | 0.285 | 0.1102 |
| 1421 | A | 0.152 | 0.0331 |
| 1422 | C | 0.257 | 0.1171 |
| 1423 | A | 0.331 | 0.1408 |
| 1424 | C | 0.127 | 0.0346 |
| 1425 | C | 0.209 | 0.1042 |
| 1426 | U | 0.253 | 0.1382 |
| 1427 | C | 0.132 | 0.1069 |
| 1428 | C | 0.243 | 0.0880 |
| 1429 | U | 0.197 | 0.0607 |
| 1430 | U | 0.177 | 0.0443 |
| 1431 | C | 0.172 | 0.0776 |
| 1432 | U | 0.217 | 0.0477 |
| 1433 | C | 0.334 | 0.0850 |
| 1434 | G | 0.133 | 0.0205 |
| 1435 | A | 0.521 | 0.0514 |
| 1436 | U | 0.276 | 0.0514 |
| 1437 | U | 0.194 | 0.0563 |
| 1438 | C | 0.230 | 0.0835 |
| 1439 | A | 0.425 | 0.1430 |
| 1440 | G | 0.259 | 0.0913 |
| 1441 | G | 0.152 | 0.0906 |
| 1442 | A | 0.390 | 0.0804 |
| 1443 | G | 0.068 | 0.0449 |
| 1444 | C | 0.280 | 0.0873 |
| 1445 | A | 0.274 | 0.0681 |
| 1446 | U | 0.201 | 0.0994 |
| 1447 | C | -     | 0.0000 |
| 1448 | A | 0.773 | 0.2968 |
| 1449 | C | 0.155 | 0.0467 |

|      |   |       |        |
|------|---|-------|--------|
| 1450 | G | 0.376 | 0.0690 |
| 1451 | A | 0.200 | 0.0740 |
| 1452 | A | 0.439 | 0.0490 |
| 1453 | C | 0.207 | 0.0582 |
| 1454 | C | 0.119 | 0.0204 |
| 1455 | C | 0.261 | 0.4653 |
| 1456 | U | 0.440 | 0.1294 |
| 1457 | U | 0.368 | 0.1006 |
| 1458 | A | 0.547 | 0.1480 |
| 1459 | U | 0.505 | 0.0547 |
| 1460 | A | 0.804 | 0.0980 |
| 1461 | A | 0.517 | 0.1063 |
| 1462 | G | 0.350 | 0.0428 |
| 1463 | A | 0.435 | 0.0349 |
| 1464 | U | 0.207 | 0.0306 |
| 1465 | C | 0.256 | 0.0272 |
| 1466 | U | 0.369 | 0.0460 |
| 1467 | G | 0.216 | 0.0283 |
| 1468 | C | 0.247 | 0.0673 |
| 1469 | U | 0.149 | 0.0354 |
| 1470 | C | 0.389 | 0.1378 |
| 1471 | A | 0.338 | 0.0653 |
| 1472 | U | 0.215 | 0.0334 |
| 1473 | C | 0.258 | 0.0822 |
| 1474 | A | 0.577 | 0.1333 |
| 1475 | C | 0.337 | 0.1547 |
| 1476 | A | 0.672 | 0.0658 |
| 1477 | U | 0.299 | 0.0285 |
| 1478 | A | 0.641 | 0.0944 |
| 1479 | C | 0.518 | 0.0889 |
| 1480 | A | 0.469 | 0.1132 |
| 1481 | C | 0.281 | 0.1260 |
| 1482 | U | 0.591 | 0.1611 |
| 1483 | C | 0.208 | 0.1316 |
| 1484 | A | 0.507 | 0.0945 |
| 1485 | G | 0.166 | 0.0296 |
| 1486 | C | 0.215 | 0.0832 |
| 1487 | A | 0.406 | 0.0395 |
| 1488 | U | 0.102 | 0.0669 |
| 1489 | C | 0.262 | 0.0519 |
| 1490 | A | 0.494 | 0.0901 |
| 1491 | U | 0.273 | 0.0668 |
| 1492 | C | 0.313 | 0.0716 |
| 1493 | U | 0.404 | 0.1239 |
| 1494 | A | 0.215 | 0.0642 |
| 1495 | A | 0.680 | 0.1027 |
| 1496 | U | 0.241 | 0.0749 |
| 1497 | C | 0.243 | 0.0596 |
| 1498 | C | 0.239 | 0.0579 |
| 1499 | U | 0.368 | 0.0504 |

|      |   |       |        |
|------|---|-------|--------|
| 1500 | G | 0.543 | 0.0493 |
| 1501 | A | 1.129 | 0.0328 |
| 1502 | C | 0.575 | 0.1322 |
| 1503 | A | 1.385 | 0.1141 |
| 1504 | U | 0.366 | 0.0390 |
| 1505 | A | 0.611 | 0.0737 |
| 1506 | A | 0.729 | 0.0398 |
| 1507 | A | 0.652 | 0.0632 |
| 1508 | C | 0.174 | 0.0488 |
| 1509 | G | 0.420 | 0.1026 |
| 1510 | U | 0.260 | 0.1070 |
| 1511 | A | 0.442 | 0.1044 |
| 1512 | G | 0.281 | 0.0874 |
| 1513 | U | 0.170 | 0.0473 |
| 1514 | U | 0.261 | 0.0471 |
| 1515 | G | 0.172 | 0.0169 |
| 1516 | A | 0.180 | 0.0440 |
| 1517 | U | 0.220 | 0.0222 |
| 1518 | G | 0.183 | 0.0336 |
| 1519 | C | 0.231 | 0.0641 |
| 1520 | U | 0.544 | 0.1691 |
| 1521 | C | 0.088 | 0.0664 |
| 1522 | A | 0.695 | 0.1197 |
| 1523 | A | 0.614 | 0.1192 |
| 1524 | A | 0.527 | 0.0956 |
| 1525 | A | 0.582 | 0.0954 |
| 1526 | A | 0.907 | 0.0449 |
| 1527 | A | 0.757 | 0.1085 |
| 1528 | G | 0.703 | 0.0551 |
| 1529 | A | 0.725 | 0.0965 |
| 1530 | A | 1.196 | 0.1091 |
| 1531 | A | 0.795 | 0.0693 |
| 1532 | U | 0.538 | 0.0247 |
| 1533 | A | 0.576 | 0.0718 |
| 1534 | U | 0.662 | 0.0514 |
| 1535 | A | 0.565 | 0.0185 |
| 1536 | C | 0.203 | 0.0406 |
| 1537 | C | 0.364 | 0.0458 |
| 1538 | A | 0.627 | 0.0538 |
| 1539 | A | 0.766 | 0.0790 |
| 1540 | U | 0.326 | 0.0987 |
| 1541 | U | 0.748 | 0.0670 |
| 1542 | A | 0.750 | 0.1010 |
| 1543 | A | 0.840 | 0.0782 |
| 1544 | C | 0.555 | 0.0495 |
| 1545 | G | 0.417 | 0.0955 |
| 1546 | C | 0.357 | 0.0624 |
| 1547 | U | 0.492 | 0.0804 |
| 1548 | A | 0.477 | 0.1343 |
| 1549 | U | 0.508 | 0.0817 |

|      |   |       |        |
|------|---|-------|--------|
| 1550 | U | 0.355 | 0.0785 |
| 1551 | G | 0.444 | 0.0625 |
| 1552 | G | 0.184 | 0.1088 |
| 1553 | U | 0.234 | 0.0996 |
| 1554 | G | 0.274 | 0.0790 |
| 1555 | A | 0.574 | 0.0679 |
| 1556 | C | 0.172 | 0.0540 |
| 1557 | C | 0.332 | 0.0615 |
| 1558 | U | 0.849 | 0.2205 |
| 1559 | A | 0.881 | 0.2024 |
| 1560 | C | 0.569 | 0.1612 |
| 1561 | A | 1.151 | 0.2221 |
| 1562 | A | 0.874 | 0.0655 |
| 1563 | U | 0.869 | 0.1020 |
| 1564 | U | 0.431 | 0.0370 |
| 1565 | U | 0.971 | 0.0899 |
| 1566 | C | 1.108 | 0.1830 |
| 1567 | A | 0.456 | 0.2450 |
| 1568 | C | 0.295 | 0.1385 |
| 1569 | U | 0.330 | 0.1538 |
| 1570 | U | 0.567 | 0.1056 |
| 1571 | C | 0.316 | 0.0824 |
| 1572 | C | 0.437 | 0.0686 |
| 1573 | A | 0.677 | 0.0930 |
| 1574 | G | 0.431 | 0.0455 |
| 1575 | G | 0.500 | 0.0761 |
| 1576 | A | 0.253 | 0.0709 |
| 1577 | C | 0.664 | 0.1517 |
| 1578 | A | 0.321 | 0.0254 |
| 1579 | A | 0.315 | 0.0768 |
| 1580 | C | 0.361 | 0.0372 |
| 1581 | A | 0.601 | 0.0956 |
| 1582 | C | 0.398 | 0.1205 |
| 1583 | C | 0.672 | 0.0731 |
| 1584 | A | 0.534 | 0.0442 |
| 1585 | A | 0.780 | 0.0476 |
| 1586 | A | 1.042 | 0.0940 |
| 1587 | A | 0.570 | 0.0952 |
| 1588 | C | 0.610 | 0.1198 |
| 1589 | A | 0.803 | 0.1214 |
| 1590 | U | 0.702 | 0.0917 |
| 1591 | C | 0.644 | 0.0598 |
| 1592 | A | 1.005 | 0.0869 |
| 1593 | A | 1.197 | 0.1857 |
| 1594 | U | 0.798 | 0.0587 |
| 1595 | A | 0.956 | 0.0727 |
| 1596 | A | 0.962 | 0.0499 |
| 1597 | A | 0.919 | 0.0806 |
| 1598 | G | 0.411 | 0.1193 |
| 1599 | G | 0.320 | 0.0695 |



|      |   |       |        |
|------|---|-------|--------|
| 1600 | U | 0.341 | 0.0657 |
| 1601 | A | 0.393 | 0.0729 |
| 1602 | U | 0.614 | 0.0216 |
| 1603 | U | 0.423 | 0.0660 |
| 1604 | G | 0.637 | 0.0421 |
| 1605 | C | 0.418 | 0.0237 |
| 1606 | A | 0.497 | 0.1174 |
| 1607 | C | 0.416 | 0.0360 |
| 1608 | A | 0.344 | 0.1070 |
| 1609 | C | 0.524 | 0.0658 |
| 1610 | U | 0.403 | 0.0474 |
| 1611 | C | 0.526 | 0.0459 |
| 1612 | C | 0.414 | 0.0476 |
| 1613 | U | 0.721 | 0.0570 |
| 1614 | A | 1.177 | 0.1048 |
| 1615 | A | 1.172 | 0.0767 |
| 1616 | C | 0.797 | 0.1297 |
| 1617 | A | 0.879 | 0.0480 |
| 1618 | U | 0.834 | 0.0574 |
| 1619 | A | 0.834 | 0.0265 |
| 1620 | G | 0.659 | 0.0502 |
| 1621 | C | 0.319 | 0.0474 |
| 1622 | C | 0.328 | 0.0402 |
| 1623 | U | 0.862 | 0.0739 |
| 1624 | A | 0.315 | 0.0399 |
| 1625 | U | 0.725 | 0.0367 |
| 1626 | G | 0.577 | 0.0444 |
| 1627 | A | 0.548 | 0.0679 |
| 1628 | C | 0.089 | 0.0471 |
| 1629 | U | 0.628 | 0.0347 |
| 1630 | U | 0.590 | 0.0746 |
| 1631 | A | 0.843 | 0.0132 |
| 1632 | C | 0.143 | 0.0418 |
| 1633 | U | 0.476 | 0.0753 |
| 1634 | C | 0.693 | 0.0931 |
| 1635 | A | 0.960 | 0.1176 |
| 1636 | G | 0.429 | 0.0971 |
| 1637 | U | 0.424 | 0.0623 |
| 1638 | U | 0.340 | 0.0282 |
| 1639 | U | 0.876 | 0.0677 |
| 1640 | G | 0.680 | 0.1143 |
| 1641 | A | 1.089 | 0.1038 |
| 1642 | A | 1.172 | 0.1037 |
| 1643 | U | 0.908 | 0.0727 |
| 1644 | G | 0.879 | 0.0918 |
| 1645 | A | 0.912 | 0.1396 |
| 1646 | A | 0.970 | 0.1537 |
| 1647 | U | 0.452 | 0.0882 |
| 1648 | U | 0.439 | 0.0834 |
| 1649 | G | 0.631 | 0.1501 |

|      |   |       |        |
|------|---|-------|--------|
| 1650 | G | 0.239 | 0.0825 |
| 1651 | C | 0.384 | 0.0774 |
| 1652 | U | 0.456 | 0.0778 |
| 1653 | G | 0.702 | 0.0699 |
| 1654 | C | 0.623 | 0.1288 |
| 1655 | A | 0.710 | 0.0559 |
| 1656 | G | 0.606 | 0.0622 |
| 1657 | U | 0.571 | 0.0214 |
| 1658 | A | 1.156 | 0.0460 |
| 1659 | G | 0.914 | 0.1204 |
| 1660 | A | 0.760 | 0.0633 |
| 1661 | U | 1.132 | 0.0674 |
| 1662 | A | 1.162 | 0.0313 |
| 1663 | U | 0.462 | 0.0500 |
| 1664 | C | 0.675 | 0.1158 |
| 1665 | A | 0.845 | 0.0344 |
| 1666 | C | 0.686 | 0.0451 |
| 1667 | A | 0.936 | 0.1241 |
| 1668 | G | 0.542 | 0.0703 |
| 1669 | C | 0.325 | 0.0298 |
| 1670 | A | 0.645 | 0.0331 |
| 1671 | U | 0.819 | 0.0519 |
| 1672 | G | 0.502 | 0.0503 |
| 1673 | C | 0.346 | 0.0866 |
| 1674 | U | 0.053 | 0.0267 |
| 1675 | U | 0.405 | 0.0713 |
| 1676 | U | 0.623 | 0.0710 |
| 1677 | A | 0.753 | 0.1005 |
| 1678 | C | 0.549 | 0.1153 |
| 1679 | C | 0.494 | 0.0522 |
| 1680 | A | 1.231 | 0.3263 |
| 1681 | A | 1.148 | 0.2333 |
| 1682 | A | 0.860 | 0.2392 |
| 1683 | A | 1.144 | 0.3638 |
| 1684 | A | 0.349 | 0.1128 |
| 1685 | C | 0.419 | 0.1538 |
| 1686 | G | 0.830 | 0.2984 |
| 1687 | U | 0.378 | 0.1215 |
| 1688 | C | 0.301 | 0.0754 |
| 1689 | U | 0.522 | 0.2181 |
| 1690 | U | 1.211 | 0.4297 |
| 1691 | A | 0.916 | 0.3454 |
| 1692 | G | 0.683 | 0.1498 |
| 1693 | A | 0.514 | 0.1861 |
| 1694 | A | 0.701 | 0.2044 |
| 1695 | C | 0.326 | 0.0954 |
| 1696 | G | 0.391 | 0.1638 |
| 1697 | G | 0.266 | 0.0548 |
| 1698 | U | 0.473 | 0.1923 |
| 1699 | C | 0.193 | 0.1220 |

|      |   |       |        |
|------|---|-------|--------|
| 1700 | U | 0.383 | 0.1033 |
| 1701 | G | 0.487 | 0.2000 |
| 1702 | A | 0.424 | 0.0690 |
| 1703 | C | 0.560 | 0.2830 |
| 1704 | G | 0.333 | 0.1317 |
| 1705 | G | 0.166 | 0.0343 |
| 1706 | C | 0.230 | 0.0316 |
| 1707 | A | 0.567 | 0.3968 |
| 1708 | C | 0.337 | 0.2134 |
| 1709 | U | 0.311 | 0.0893 |
| 1710 | G | 0.322 | 0.1244 |
| 1711 | U | 0.166 | 0.0268 |
| 1712 | A | 0.420 | 0.1713 |
| 1713 | C | 0.175 | 0.0632 |
| 1714 | U | 0.402 | 0.1731 |
| 1715 | U | 0.379 | 0.1090 |
| 1716 | G | 0.207 | 0.0874 |
| 1717 | C | 0.404 | 1.3426 |
| 1718 | A | 0.320 | 0.1839 |
| 1719 | C | 0.202 | 0.0367 |
| 1720 | C | 0.100 | 0.0195 |
| 1721 | U | 0.187 | 0.0322 |
| 1722 | A | 0.674 | 0.2010 |
| 1723 | U | 0.458 | 0.1724 |
| 1724 | C | 0.428 | 0.1190 |
| 1725 | G | 0.371 | 0.1290 |
| 1726 | U | 0.254 | 0.1143 |
| 1727 | A | 0.585 | 0.2337 |
| 1728 | A | 0.563 | 0.1716 |
| 1729 | A | 0.493 | 0.0690 |
| 1730 | A | 0.389 | 0.0775 |
| 1731 | U | 0.187 | 0.0488 |
| 1732 | A | 0.613 | 0.0843 |
| 1733 | U | 0.377 | 0.1513 |
| 1734 | G | 0.291 | 0.1135 |
| 1735 | G | 0.189 | 0.0715 |
| 1736 | A | 0.494 | 0.1383 |
| 1737 | G | 0.149 | 0.0581 |
| 1738 | A | 0.286 | 0.0466 |
| 1739 | C | 0.198 | 0.0519 |
| 1740 | U | 0.315 | 0.1155 |
| 1741 | U | 0.261 | 0.3320 |
| 1742 | U | 0.288 | 0.1030 |
| 1743 | U | 0.231 | 0.0646 |
| 1744 | A | 0.447 | 0.1348 |
| 1745 | C | 0.070 | 0.0342 |
| 1746 | U | 0.441 | 0.2004 |
| 1747 | G | 0.298 | 0.0875 |
| 1748 | G | 0.196 | 0.1083 |
| 1749 | G | 0.116 | 0.0363 |

|      |   |       |        |
|------|---|-------|--------|
| 1750 | U | 0.201 | 0.0776 |
| 1751 | A | 0.544 | 0.1366 |
| 1752 | U | 0.213 | 0.0688 |
| 1753 | C | 0.384 | 0.1502 |
| 1754 | U | 0.560 | 0.1333 |
| 1755 | A | 0.660 | 0.3224 |
| 1756 | A | 0.600 | 0.2716 |
| 1757 | A | 0.756 | 0.3113 |
| 1758 | A | 0.823 | 0.2960 |
| 1759 | A | 0.311 | 0.1227 |
| 1760 | G | 0.404 | 0.1893 |
| 1761 | U | 0.258 | 0.1370 |
| 1762 | A | 0.608 | 0.1153 |
| 1763 | C | 0.165 | 0.0537 |
| 1764 | U | 0.401 | 0.1183 |
| 1765 | U | 0.582 | 0.1977 |
| 1766 | G | 0.200 | 0.0915 |
| 1767 | C | 0.312 | 0.1927 |
| 1768 | U | 0.441 | 0.2819 |
| 1769 | U | 0.489 | 0.2171 |
| 1770 | C | 0.154 | 0.1070 |
| 1771 | C | 0.444 | 0.1090 |
| 1772 | A | 0.735 | 0.1467 |
| 1773 | U | 0.284 | 0.0627 |
| 1774 | C | 0.440 | 0.1192 |
| 1775 | A | 0.659 | 0.1362 |
| 1776 | A | 1.024 | 0.1607 |
| 1777 | A | 0.343 | 0.0208 |
| 1778 | U | 0.724 | 0.1953 |
| 1779 | A | 0.681 | 0.1390 |
| 1780 | U | 0.045 | 0.0304 |
| 1781 | C | 0.126 | 0.0184 |
| 1782 | U | 0.393 | 0.0558 |
| 1783 | C | 0.223 | 0.0749 |
| 1784 | C | 0.312 | 0.1606 |
| 1785 | G | 0.193 | 0.1399 |
| 1786 | U | -     | 0.0000 |
| 1787 | A | 0.441 | 0.2076 |
| 1788 | C | 0.070 | 0.0490 |
| 1789 | C | 0.080 | 0.0318 |
| 1790 | C | 0.405 | 0.2597 |
| 1791 | A | 0.519 | 0.1493 |
| 1792 | C | 0.084 | 0.0176 |
| 1793 | C | 0.376 | 0.0764 |
| 1794 | A | 0.770 | 0.0861 |
| 1795 | U | 0.439 | 0.1757 |
| 1796 | C | 0.618 | 0.1950 |
| 1797 | A | 1.118 | 0.3024 |
| 1798 | A | 1.050 | 0.3376 |
| 1799 | U | 0.658 | 0.1565 |

|      |   |       |        |
|------|---|-------|--------|
| 1800 | A | 1.202 | 0.4987 |
| 1801 | A | 0.565 | 0.2306 |
| 1802 | U | 0.375 | 0.1904 |
| 1803 | G | 0.380 | 0.0859 |
| 1804 | U | 0.186 | 0.0650 |
| 1805 | C | 0.199 | 0.0454 |
| 1806 | C | 0.211 | 0.0401 |
| 1807 | A | 0.582 | 0.1237 |
| 1808 | U | 0.529 | 0.1491 |
| 1809 | A | 0.297 | 0.1895 |
| 1810 | C | 0.252 | 0.0989 |
| 1811 | A | 0.371 | 0.1692 |
| 1812 | A | 0.512 | 0.1029 |
| 1813 | G | 0.397 | 0.0538 |
| 1814 | U | 0.328 | 0.0277 |
| 1815 | G | 0.132 | 0.0625 |
| 1816 | A | 0.396 | 0.0587 |
| 1817 | A | 0.609 | 0.0768 |
| 1818 | A | 0.292 | 0.0252 |
| 1819 | G | 0.307 | 0.0314 |
| 1820 | U | 0.139 | 0.0075 |
| 1821 | A | 0.424 | 0.0260 |
| 1822 | C | 0.178 | 0.0417 |
| 1823 | A | 0.423 | 0.0183 |
| 1824 | C | 0.459 | 0.0254 |
| 1825 | G | 0.381 | 0.0792 |
| 1826 | C | 0.362 | 0.1562 |
| 1827 | A | 0.828 | 0.3467 |
| 1828 | A | 0.929 | 0.0790 |
| 1829 | A | 0.523 | 0.0949 |
| 1830 | U | 0.503 | 0.0644 |
| 1831 | A | 0.778 | 0.0206 |
| 1832 | U | 0.594 | 0.0762 |
| 1833 | C | 0.322 | 0.0101 |
| 1834 | C | 0.498 | 0.0118 |
| 1835 | U | 0.291 | 0.0660 |
| 1836 | U | 0.474 | 0.0842 |
| 1837 | A | 0.768 | 0.0471 |
| 1838 | U | 0.464 | 0.0916 |
| 1839 | C | 0.387 | 0.0820 |
| 1840 | C | 0.252 | 0.0991 |
| 1841 | U | 0.553 | 0.0982 |
| 1842 | U | 0.437 | 0.0910 |
| 1843 | U | 0.639 | 0.0376 |
| 1844 | C | 0.434 | 0.2157 |
| 1845 | A | 0.668 | 0.1086 |
| 1846 | U | 0.693 | 0.1737 |
| 1847 | U | 0.119 | 0.0505 |
| 1848 | C | 0.422 | 0.0287 |
| 1849 | A | 0.559 | 0.0250 |

|      |   |       |        |
|------|---|-------|--------|
| 1850 | U | 0.466 | 0.1007 |
| 1851 | C | 0.579 | 0.1354 |
| 1852 | G | 0.380 | 0.0320 |
| 1853 | A | 0.361 | 0.0362 |
| 1854 | A | -     | 0.0000 |
| 1855 | U | 1.006 | 0.1987 |
| 1856 | G | 0.193 | 0.0552 |
| 1857 | C | 0.129 | 0.1028 |
| 1858 | U | 0.340 | 0.1010 |
| 1859 | U | 0.418 | 0.1129 |
| 1860 | G | 0.420 | 0.1310 |
| 1861 | C | 0.442 | 0.1005 |
| 1862 | G | 0.215 | 0.0692 |
| 1863 | C | 0.444 | 0.0286 |
| 1864 | A | 0.237 | 0.0656 |
| 1865 | U | 0.694 | 0.1988 |
| 1866 | G | 0.516 | 0.1125 |
| 1867 | C | 0.353 | 0.0173 |
| 1868 | C | 0.593 | 0.0656 |
| 1869 | A | 0.331 | 0.0748 |
| 1870 | A | 0.602 | 0.1464 |
| 1871 | U | 0.376 | 0.0188 |
| 1872 | G | 0.131 | 0.0774 |
| 1873 | C | 0.169 | 0.0619 |
| 1874 | A | 0.412 | 0.0820 |
| 1875 | C | 0.136 | 0.0941 |
| 1876 | A | 0.572 | 0.1747 |
| 1877 | G | 0.356 | 0.0938 |
| 1878 | A | 0.268 | 0.1261 |
| 1879 | C | 0.416 | 0.0883 |
| 1880 | A | 0.259 | 0.0679 |
| 1881 | A | 0.417 | 0.1151 |
| 1882 | U | 0.328 | 0.1159 |
| 1883 | U | 0.189 | 0.0699 |
| 1884 | C | 0.409 | 0.0930 |
| 1885 | G | 0.042 | 0.0325 |
| 1886 | A | 0.418 | 0.0869 |
| 1887 | U | 0.280 | 0.1166 |
| 1888 | A | 0.450 | 0.1115 |
| 1889 | C | 0.113 | 0.0214 |
| 1890 | U | 0.424 | 0.1255 |
| 1891 | C | 0.792 | 0.4249 |
| 1892 | A | 0.835 | 0.1335 |
| 1893 | C | 0.335 | 0.0774 |
| 1894 | U | 0.543 | 0.0535 |
| 1895 | U | 1.919 | 0.3835 |
| 1896 | A | 1.853 | 0.3730 |
| 1897 | A | 2.239 | 0.3097 |
| 1898 | A | 1.033 | 0.0967 |
| 1899 | A | 1.823 | 0.1492 |

|      |   |       |        |
|------|---|-------|--------|
| 1900 | A | 0.736 | 0.0813 |
| 1901 | U | 1.531 | 0.3851 |
| 1902 | A | 1.278 | 0.2025 |
| 1903 | A | 0.725 | 0.1198 |
| 1904 | C | 0.305 | 0.0281 |
| 1905 | A | 0.791 | 0.1013 |
| 1906 | C | 0.150 | 0.0049 |
| 1907 | C | 0.664 | 0.0975 |
| 1908 | A | 0.601 | 0.0511 |
| 1909 | U | 0.353 | 0.0692 |
| 1910 | C | 0.639 | 0.1069 |
| 1911 | A | 0.653 | 0.1001 |
| 1912 | C | 0.373 | 0.1775 |
| 1913 | G | 0.378 | 0.0171 |
| 1914 | U | 0.260 | 0.0994 |
| 1915 | A | 0.836 | 0.1077 |
| 1916 | U | 0.207 | 0.0042 |
| 1917 | U | 0.500 | 0.0736 |
| 1918 | U | 0.137 | 0.0772 |
| 1919 | U | 0.331 | 0.1164 |
| 1920 | A | 0.757 | 0.1185 |
| 1921 | A | 0.689 | 0.0784 |
| 1922 | C | 0.495 | 0.0884 |
| 1923 | G | 0.359 | 0.0957 |
| 1924 | A | 0.626 | 0.0704 |
| 1925 | A | 0.694 | 0.0908 |
| 1926 | U | 0.327 | 0.0964 |
| 1927 | C | 0.371 | 0.0850 |
| 1928 | A | 0.628 | 0.1612 |
| 1929 | G | 0.918 | 0.1454 |
| 1930 | A | 0.404 | 0.0993 |
| 1931 | U | 0.416 | 0.1046 |
| 1932 | G | 0.438 | 0.1104 |
| 1933 | U | 0.123 | 0.0424 |
| 1934 | C | 0.443 | 0.0910 |
| 1935 | G | 0.595 | 0.1197 |
| 1936 | A | 0.378 | 0.1419 |
| 1937 | C | 0.380 | 0.1070 |
| 1938 | U | 0.489 | 0.1799 |
| 1939 | G | 0.613 | 0.0562 |
| 1940 | G | 0.413 | 0.0639 |
| 1941 | U | 0.193 | 0.0171 |
| 1942 | C | 0.395 | 0.1391 |
| 1943 | U | 0.483 | 0.2060 |
| 1944 | A | 0.445 | 0.1126 |
| 1945 | G | 0.519 | 0.1527 |
| 1946 | U | 0.501 | 0.1690 |
| 1947 | G | 0.367 | 0.0533 |
| 1948 | C | 0.322 | 0.1192 |
| 1949 | U | 0.356 | 0.1302 |

|      |   |       |        |
|------|---|-------|--------|
| 1950 | A | 0.827 | 0.2344 |
| 1951 | U | 0.269 | 0.0898 |
| 1952 | U | 0.685 | 0.2500 |
| 1953 | G | 0.554 | 0.1369 |
| 1954 | A | 0.710 | 0.1381 |
| 1955 | C | 0.244 | 0.0613 |
| 1956 | U | 0.457 | 0.0910 |
| 1957 | A | 1.953 | 0.3707 |
| 1958 | U | 0.635 | 0.0894 |
| 1959 | C | 0.484 | 0.1153 |
| 1960 | A | 1.392 | 0.3322 |
| 1961 | A | 1.175 | 0.2124 |
| 1962 | U | 0.655 | 0.2156 |
| 1963 | G | 0.634 | 0.1586 |
| 1964 | U | 0.480 | 0.0947 |
| 1965 | C | 0.414 | 0.0910 |
| 1966 | C | 0.392 | 0.0793 |
| 1967 | U | 0.549 | 0.1778 |
| 1968 | G | 0.253 | 0.1636 |
| 1969 | A | 0.530 | 0.2521 |
| 1970 | U | 0.407 | 0.2582 |
| 1971 | U | 0.862 | 0.3142 |
| 1972 | G | 0.863 | 0.1495 |
| 1973 | U | 0.619 | 0.2552 |
| 1974 | U | 0.967 | 0.3633 |
| 1975 | U | 0.353 | 0.0318 |
| 1976 | A | 0.575 | 0.1438 |
| 1977 | A | 0.757 | 0.1796 |
| 1978 | U | 0.285 | 0.0830 |
| 1979 | C | 0.541 | 0.1344 |
| 1980 | G | 0.735 | 0.1640 |
| 1981 | G | 0.422 | 0.1426 |
| 1982 | C | 0.324 | 0.1473 |
| 1983 | A | 0.848 | 0.2035 |
| 1984 | A | 0.632 | 0.1420 |
| 1985 | A | 1.197 | 0.3238 |
| 1986 | A | 0.330 | 0.0575 |
| 1987 | G | 0.148 | 0.0301 |
| 1988 | C | 0.323 | 0.0582 |
| 1989 | A | 0.573 | 0.1164 |
| 1990 | C | 0.215 | 0.0508 |
| 1991 | C | 0.212 | 0.0166 |
| 1992 | A | 0.839 | 0.2255 |
| 1993 | A | 0.656 | 0.1331 |
| 1994 | A | 0.660 | 0.1206 |
| 1995 | C | 0.363 | 0.1926 |
| 1996 | A | 0.857 | 0.1467 |
| 1997 | C | 0.499 | 0.1281 |
| 1998 | A | 0.715 | 0.0841 |
| 1999 | G | 0.671 | 0.0985 |



|      |   |       |        |
|------|---|-------|--------|
| 2000 | A | 0.540 | 0.0546 |
| 2001 | C | 0.605 | 0.1126 |
| 2002 | A | 0.600 | 0.0514 |
| 2003 | U | 0.587 | 0.0815 |
| 2004 | A | 1.022 | 0.0841 |
| 2005 | U | 0.758 | 0.0696 |
| 2006 | C | 0.577 | 0.1495 |
| 2007 | A | 0.717 | 0.1051 |
| 2008 | A | 0.965 | 0.2452 |
| 2009 | A | 1.085 | 0.3174 |
| 2010 | G | 0.521 | 0.1677 |
| 2011 | G | 0.579 | 0.1946 |
| 2012 | U | 0.062 | 0.0297 |
| 2013 | U | 0.135 | 0.0674 |
| 2014 | C | 0.666 | 0.2219 |
| 2015 | A | 0.277 | 0.0232 |
| 2016 | C | 0.599 | 0.1402 |
| 2017 | G | 0.573 | 0.1239 |
| 2018 | A | 0.825 | 0.1995 |
| 2019 | C | 0.501 | 0.2945 |
| 2020 | U | 0.347 | 0.1500 |
| 2021 | A | 1.047 | 0.3292 |
| 2022 | A | 1.110 | 0.2983 |
| 2023 | A | 0.586 | 0.0420 |
| 2024 | A | 0.355 | 0.0933 |
| 2025 | U | 0.555 | 0.0691 |
| 2026 | A | 0.978 | 0.1874 |
| 2027 | C | 0.482 | 0.1033 |
| 2028 | C | 0.445 | 0.1370 |
| 2029 | A | 1.058 | 0.2366 |
| 2030 | A | 1.368 | 0.2485 |
| 2031 | A | 0.950 | 0.2019 |
| 2032 | A | 1.143 | 0.2712 |
| 2033 | U | 0.530 | 0.1200 |
| 2034 | U | 0.888 | 0.1582 |
| 2035 | C | 0.882 | 0.2537 |
| 2036 | A | 0.569 | 0.0772 |
| 2037 | U | 1.011 | 0.1662 |
| 2038 | A | 1.063 | 0.1953 |
| 2039 | C | 0.208 | 0.0941 |
| 2040 | G | 0.376 | 0.1748 |
| 2041 | A | 0.267 | 0.1110 |
| 2042 | A | 0.537 | 0.2061 |
| 2043 | C | 0.226 | 0.0536 |
| 2044 | C | 0.314 | 0.1168 |
| 2045 | C | 0.273 | 0.1231 |
| 2046 | U | 0.641 | 0.1368 |
| 2047 | U | 0.582 | 0.0856 |
| 2048 | U | 0.673 | 0.1282 |
| 2049 | C | 0.990 | 0.2070 |

|      |   |       |        |
|------|---|-------|--------|
| 2050 | A | 0.981 | 0.2005 |
| 2051 | A | 0.301 | 0.1129 |
| 2052 | U | 0.689 | 0.1373 |
| 2053 | A | 0.987 | 0.2366 |
| 2054 | C | 0.320 | 0.0368 |
| 2055 | C | 0.289 | 0.0523 |
| 2056 | U | 0.615 | 0.0288 |
| 2057 | A | 0.823 | 0.0985 |
| 2058 | C | 0.468 | 0.0578 |
| 2059 | A | 0.626 | 0.0622 |
| 2060 | U | 0.853 | 0.1071 |
| 2061 | A | 0.638 | 0.0833 |
| 2062 | C | 0.240 | 0.0348 |
| 2063 | U | 0.413 | 0.1012 |
| 2064 | G | 0.593 | 0.0885 |
| 2065 | A | 0.405 | 0.0542 |
| 2066 | C | 0.276 | 0.0370 |
| 2067 | A | 0.512 | 0.0813 |
| 2068 | U | 0.445 | 0.0485 |
| 2069 | A | 0.461 | 0.1051 |
| 2070 | U | 0.292 | 0.0493 |
| 2071 | U | 0.327 | 0.0248 |
| 2072 | U | 0.297 | 0.0428 |
| 2073 | G | 0.285 | 0.0644 |
| 2074 | G | 0.272 | 0.0422 |
| 2075 | U | 0.151 | 0.0297 |
| 2076 | C | 0.291 | 0.0302 |
| 2077 | C | 0.321 | 0.0336 |
| 2078 | A | 0.489 | 0.0466 |
| 2079 | G | 0.325 | 0.0561 |
| 2080 | U | 0.302 | 0.0358 |
| 2081 | U | 0.421 | 0.0304 |
| 2082 | C | 0.816 | 0.0419 |
| 2083 | A | 0.374 | 0.0965 |
| 2084 | C | 0.305 | 0.1063 |
| 2085 | A | 0.438 | 0.0928 |
| 2086 | A | 0.640 | 0.0583 |
| 2087 | C | 0.068 | 0.0396 |
| 2088 | C | 0.119 | 0.0757 |
| 2089 | U | 0.394 | 0.1052 |
| 2090 | A | 0.544 | 0.1456 |
| 2091 | C | 0.074 | 0.0035 |
| 2092 | C | 0.238 | 0.0491 |
| 2093 | A | 0.312 | 0.0032 |
| 2094 | A | 0.198 | 0.0237 |
| 2095 | A | 0.319 | 0.0011 |
| 2096 | U | 0.241 | 0.0509 |
| 2097 | A | 0.162 | 0.0428 |
| 2098 | G | 0.505 | 0.0329 |
| 2099 | U | 0.359 | 0.0573 |

|      |   |       |        |
|------|---|-------|--------|
| 2100 | G | 0.421 | 0.1623 |
| 2101 | C | 0.177 | 0.0286 |
| 2102 | A | 0.233 | 0.1082 |
| 2103 | C | 0.250 | 0.1390 |
| 2104 | C | 0.312 | 0.1215 |
| 2105 | A | 0.480 | 0.0937 |
| 2106 | U | 0.217 | 0.0416 |
| 2107 | C | 0.247 | 0.1486 |
| 2108 | C | 0.219 | 0.0829 |
| 2109 | U | 0.414 | 0.1931 |
| 2110 | A | 0.424 | 0.1225 |
| 2111 | U | 0.366 | 0.0516 |
| 2112 | U | 0.521 | 0.2489 |
| 2113 | U | 0.293 | 0.1461 |
| 2114 | C | 0.356 | 0.2631 |
| 2115 | A | 0.483 | 0.3983 |
| 2116 | U | 0.172 | 0.0477 |
| 2117 | C | 0.145 | 0.0314 |
| 2118 | U | 0.128 | 0.0479 |
| 2119 | C | 0.294 | 0.0796 |
| 2120 | A | 0.768 | 0.1276 |
| 2121 | U | 0.155 | 0.1376 |
| 2122 | U | 0.264 | 0.0542 |
| 2123 | U | 0.354 | 0.1428 |
| 2124 | A | 0.751 | 0.0829 |
| 2125 | C | 0.131 | 0.0298 |
| 2126 | U | 0.382 | 0.0205 |
| 2127 | G | 0.385 | 0.0262 |
| 2128 | A | 0.110 | 0.1134 |
| 2129 | U | 0.059 | 0.0191 |
| 2130 | G | 0.096 | 0.0487 |
| 2131 | A | 0.162 | 0.1478 |
| 2132 | G | 0.301 | 0.1562 |
| 2133 | A | 0.554 | 0.1771 |
| 2134 | C | 0.189 | 0.0941 |
| 2135 | A | 0.337 | 0.2898 |
| 2136 | A | 0.750 | 0.2637 |
| 2137 | C | 0.650 | 0.2786 |
| 2138 | A | 0.369 | 0.1377 |
| 2139 | A | 0.735 | 0.2451 |
| 2140 | A | 0.958 | 0.3361 |
| 2141 | A | 0.741 | 0.2824 |
| 2142 | U | 0.281 | 0.2366 |
| 2143 | U | 0.129 | 0.0439 |
| 2144 | C | 0.422 | 0.0981 |
| 2145 | C | 0.388 | 0.0598 |
| 2146 | G | 0.188 | 0.0481 |
| 2147 | U | 0.262 | 0.1044 |
| 2148 | U | -     | 0.0000 |
| 2149 | G | 0.311 | 0.1683 |

|      |   |       |        |
|------|---|-------|--------|
| 2150 | G | 0.381 | 0.2892 |
| 2151 | G | 0.262 | 0.0502 |
| 2152 | U | 0.268 | 0.1336 |
| 2153 | U | 0.262 | 0.0787 |
| 2154 | U | 0.161 | 0.1398 |
| 2155 | A | 0.279 | 0.2043 |
| 2156 | U | 0.386 | 0.2016 |
| 2157 | C | 0.220 | 0.2086 |
| 2158 | C | -     | 0.0000 |
| 2159 | A | 0.454 | 0.0028 |
| 2160 | U | 0.178 | 0.0177 |
| 2161 | U | 0.346 | 0.0354 |
| 2162 | A | 0.560 | 0.1234 |
| 2163 | C | 0.129 | 0.0849 |
| 2164 | A | 0.695 | 0.0822 |
| 2165 | C | 0.151 | 0.0860 |
| 2166 | G | 0.122 | 0.0729 |
| 2167 | A | -     | 0.0000 |
| 2168 | C | -     | 0.0000 |
| 2169 | C | 0.179 | 0.0960 |
| 2170 | G | 0.409 | 0.0296 |
| 2171 | U | 0.227 | 0.1083 |
| 2172 | C | 0.227 | 0.0332 |
| 2173 | G | 0.857 | 0.1616 |
| 2174 | C | 0.289 | 0.0683 |
| 2175 | G | 0.336 | 0.3674 |
| 2176 | A | 0.573 | 0.3046 |
| 2177 | G | 0.215 | 0.0912 |
| 2178 | G | 0.143 | 0.0970 |
| 2179 | A | -     | 0.0000 |
| 2180 | C | 0.457 | 0.0675 |
| 2181 | U | 0.491 | 0.0759 |
| 2182 | C | 0.504 | 0.0247 |
| 2183 | U | 0.138 | 0.0926 |
| 2184 | A | 0.342 | 0.0983 |
| 2185 | U | 0.739 | 0.1796 |
| 2186 | C | -     | 0.0000 |
| 2187 | C | 0.066 | 0.0170 |
| 2188 | U | 0.324 | 0.0718 |
| 2189 | C | 0.122 | 0.0455 |
| 2190 | G | 0.126 | 0.0339 |
| 2191 | A | 0.355 | 0.3076 |
| 2192 | U | 0.571 | 0.1137 |
| 2193 | G | 0.355 | 0.0709 |
| 2194 | U | 0.494 | 0.1223 |
| 2195 | U | 0.300 | 0.1891 |
| 2196 | U | 0.667 | 0.1176 |
| 2197 | U | 0.087 | 0.1117 |
| 2198 | U | 0.327 | 0.2181 |
| 2199 | A | 0.934 | 0.0384 |

|      |   |       |        |
|------|---|-------|--------|
| 2200 | C | 0.164 | 0.1178 |
| 2201 | U | 0.137 | 0.0252 |
| 2202 | A | 0.415 | 0.1040 |
| 2203 | C | 0.550 | 0.1294 |
| 2204 | G | 0.311 | 0.1370 |
| 2205 | A | 0.150 | 0.0205 |
| 2206 | U | 0.717 | 0.0972 |
| 2207 | A | 0.329 | 0.0337 |
| 2208 | C | 0.545 | 0.1078 |
| 2209 | U | 0.078 | 0.0622 |
| 2210 | A | 0.431 | 0.0966 |
| 2211 | G | 0.618 | 0.1235 |
| 2212 | C | 0.559 | 0.0362 |
| 2213 | U | 0.253 | 0.0081 |
| 2214 | U | 0.402 | 0.0493 |
| 2215 | U | 0.324 | 0.0720 |
| 2216 | U | 0.234 | 0.0951 |
| 2217 | A | 0.322 | 0.0998 |
| 2218 | U | 1.236 | 0.0731 |
| 2219 | U | 0.581 | 0.1700 |
| 2220 | A | 1.465 | 0.4295 |
| 2221 | A | 1.020 | 0.0392 |
| 2222 | A | 0.181 | 0.0650 |
| 2223 | A | 0.441 | 0.1601 |
| 2224 | A | 0.638 | 0.2141 |
| 2225 | C | 0.335 | 0.0612 |
| 2226 | C | 0.380 | 0.0476 |
| 2227 | A | 0.297 | 0.0422 |
| 2228 | G | 0.942 | 0.0642 |
| 2229 | U | 0.637 | 0.1373 |
| 2230 | U | 0.524 | 0.0315 |
| 2231 | U | 0.484 | 0.1026 |
| 2232 | C | 0.401 | 0.0340 |
| 2233 | A | 0.596 | 0.1829 |
| 2234 | G | 0.495 | 0.0215 |
| 2235 | G | 0.538 | 0.1897 |
| 2236 | C | -     | 0.0000 |
| 2237 | C | 0.161 | 0.0532 |
| 2238 | A | 0.203 | 0.0523 |
| 2239 | G | 0.916 | 0.1457 |
| 2240 | U | 0.200 | 0.0300 |
| 2241 | G | 0.492 | 0.0281 |
| 2242 | U | 0.543 | 0.0838 |
| 2243 | C | 0.311 | 0.0461 |
| 2244 | U | 0.225 | 0.0131 |
| 2245 | U | 0.564 | 0.0140 |
| 2246 | G | 0.542 | 0.0787 |
| 2247 | G | 0.432 | 0.0170 |
| 2248 | U | 0.309 | 0.0396 |
| 2249 | U | 0.293 | 0.0823 |

|      |   |       |        |
|------|---|-------|--------|
| 2250 | A | 0.612 | 0.1262 |
| 2251 | U | 0.478 | 0.0722 |
| 2252 | A | -     | 0.0000 |
| 2253 | C | 0.569 | 0.0717 |
| 2254 | A | 0.523 | 0.1505 |
| 2255 | A | 0.599 | 0.1205 |
| 2256 | A | 0.382 | 0.1113 |
| 2257 | U | 0.795 | 0.1184 |
| 2258 | G | 0.844 | 0.1973 |
| 2259 | G | -     | 0.0000 |
| 2260 | A | 0.253 | 0.1725 |
| 2261 | C | 0.392 | 0.1861 |
| 2262 | C | 0.297 | 0.1300 |
| 2263 | G | 0.416 | 0.1133 |
| 2264 | U | 0.425 | 0.2881 |
| 2265 | G | 0.743 | 0.2600 |
| 2266 | G | 0.379 | 0.1120 |
| 2267 | U | 0.368 | 0.1692 |
| 2268 | U | 0.494 | 0.1340 |
| 2269 | C | 0.350 | 0.2668 |
| 2270 | U | 0.506 | 0.3891 |
| 2271 | G | 0.615 | 0.1263 |
| 2272 | A | 0.952 | 0.0819 |
| 2273 | G | 0.761 | 0.1120 |
| 2274 | U | 0.417 | 0.0595 |
| 2275 | A | 2.229 | 0.3072 |
| 2276 | U | 0.761 | 0.0789 |
| 2277 | A | 1.950 | 0.1773 |
| 2278 | C | 0.389 | 0.1506 |
| 2279 | U | 0.284 | 0.0174 |
| 2280 | A | 0.970 | 0.0718 |
| 2281 | A | 0.613 | 0.1352 |
| 2282 | C | 0.527 | 0.1556 |
| 2283 | A | 0.484 | 0.0812 |
| 2284 | G | 0.657 | 0.0743 |
| 2285 | A | 0.159 | 0.0804 |
| 2286 | A | 0.499 | 0.1693 |
| 2287 | C | 0.081 | 0.0565 |
| 2288 | U | 0.099 | 0.0280 |
| 2289 | C | 0.260 | 0.1004 |
| 2290 | U | 0.383 | 0.0415 |
| 2291 | C | 0.293 | 0.0633 |
| 2292 | C | 0.371 | 0.0216 |
| 2293 | A | 0.584 | 0.0101 |
| 2294 | U | 0.652 | 0.0336 |
| 2295 | A | 1.522 | 0.0266 |
| 2296 | A | 1.067 | 0.0814 |
| 2297 | A | 0.866 | 0.0601 |
| 2298 | U | 0.605 | 0.1202 |
| 2299 | U | 0.325 | 0.0999 |

|      |   |       |        |
|------|---|-------|--------|
| 2300 | C | 0.349 | 0.0824 |
| 2301 | C | 0.564 | 0.0761 |
| 2302 | U | 0.554 | 0.0395 |
| 2303 | U | 1.454 | 0.1683 |
| 2304 | G | 0.797 | 0.1546 |
| 2305 | A | 0.894 | 0.1328 |
| 2306 | A | 1.379 | 0.1013 |
| 2307 | A | 1.571 | 0.1210 |
| 2308 | A | 2.011 | 0.1824 |
| 2309 | A | 0.975 | 0.0963 |
| 2310 | A | 0.691 | 0.1132 |
| 2311 | A | 0.756 | 0.0618 |
| 2312 | U | 0.558 | 0.0938 |
| 2313 | G | 0.433 | 0.0739 |
| 2314 | G | 0.304 | 0.0156 |
| 2315 | U | 0.540 | 0.0286 |
| 2316 | A | 0.438 | 0.1079 |
| 2317 | U | 0.600 | 0.0384 |
| 2318 | A | 0.837 | 0.0570 |
| 2319 | A | 0.675 | 0.0229 |
| 2320 | C | 0.429 | 0.0734 |
| 2321 | U | 0.382 | 0.0276 |
| 2322 | C | 0.161 | 0.0370 |
| 2323 | C | 0.135 | 0.0573 |
| 2324 | A | 0.710 | 0.0074 |
| 2325 | U | 0.736 | 0.1101 |
| 2326 | G | 0.433 | 0.0134 |
| 2327 | C | 0.171 | 0.1007 |
| 2328 | U | 0.465 | 0.2300 |
| 2329 | A | 0.719 | 0.0274 |
| 2330 | U | 1.052 | 0.0518 |
| 2331 | A | 0.633 | 0.0501 |
| 2332 | C | 0.494 | 0.1361 |
| 2333 | A | 1.087 | 0.0326 |
| 2334 | A | 0.606 | 0.0323 |
| 2335 | C | 0.256 | 0.0464 |
| 2336 | C | 1.012 | 0.0991 |
| 2337 | A | 0.196 | 0.0476 |
| 2338 | C | 0.440 | 0.1164 |
| 2339 | A | 0.836 | 0.0367 |
| 2340 | G | 0.709 | 0.0751 |
| 2341 | C | 0.713 | 0.1240 |
| 2342 | G | 0.699 | 0.0609 |
| 2343 | G | 0.676 | 0.0363 |
| 2344 | A | 0.547 | 0.0669 |
| 2345 | U | 0.397 | 0.0279 |
| 2346 | U | 0.299 | 0.0600 |
| 2347 | C | 0.234 | 0.0722 |
| 2348 | C | 0.205 | 0.1018 |
| 2349 | C | 0.368 | 0.0964 |

|      |   |       |        |
|------|---|-------|--------|
| 2350 | G | 0.788 | 0.1788 |
| 2351 | A | 1.029 | 0.3263 |
| 2352 | G | 0.516 | 0.0538 |
| 2353 | C | 0.804 | 0.0784 |
| 2354 | A | 0.789 | 0.2304 |
| 2355 | C | 0.410 | 0.0536 |
| 2356 | A | 0.975 | 0.0815 |
| 2357 | U | 0.475 | 0.0418 |
| 2358 | G | 0.506 | 0.1008 |
| 2359 | G | 0.115 | 0.0463 |
| 2360 | A | 0.518 | 0.0583 |
| 2361 | G | 0.253 | 0.0579 |
| 2362 | U | 0.360 | 0.0357 |
| 2363 | C | 0.520 | 0.0094 |
| 2364 | G | 0.288 | 0.0056 |
| 2365 | C | 0.462 | 0.0275 |
| 2366 | U | 0.411 | 0.0171 |
| 2367 | G | 0.631 | 0.0693 |
| 2368 | A | 0.784 | 0.0205 |
| 2369 | A | 0.150 | 0.0095 |
| 2370 | C | 0.312 | 0.0745 |
| 2371 | G | -     | 0.0000 |
| 2372 | G | -     | 0.0000 |
| 2373 | C | 0.445 | 0.1311 |
| 2374 | U | 0.815 | 0.0549 |
| 2375 | A | 0.778 | 0.0472 |
| 2376 | A | 0.763 | 0.0188 |
| 2377 | A | 0.802 | 0.0737 |
| 2378 | C | 0.205 | 0.0438 |
| 2379 | C | 0.434 | 0.0645 |
| 2380 | G | 0.242 | 0.0253 |
| 2381 | U | 0.289 | 0.0025 |
| 2382 | A | 0.989 | 0.0231 |
| 2383 | C | 0.280 | 0.0270 |
| 2384 | C | 0.490 | 0.0050 |
| 2385 | U | 0.794 | 0.0294 |
| 2386 | U | 0.740 | 0.0293 |
| 2387 | A | 1.365 | 0.0466 |
| 2388 | U | 1.157 | 0.0950 |
| 2389 | U | 0.862 | 0.0128 |
| 2390 | A | 1.092 | 0.0774 |
| 2391 | G | 1.189 | 0.0566 |
| 2392 | A | 0.493 | 0.0816 |
| 2393 | U | 0.524 | 0.0965 |
| 2394 | G | 0.679 | 0.1033 |
| 2395 | A | 0.736 | 0.0510 |
| 2396 | C | 0.088 | 0.0053 |
| 2397 | U | 0.492 | 0.0551 |
| 2398 | G | 0.493 | 0.1393 |
| 2399 | C | 0.328 | 0.0797 |



|      |   |       |        |
|------|---|-------|--------|
| 2400 | C | 0.253 | 0.0187 |
| 2401 | G | 0.307 | 0.1107 |
| 2402 | U | 0.299 | 0.0761 |
| 2403 | A | 0.816 | 0.0962 |
| 2404 | C | 0.547 | 0.0838 |
| 2405 | U | 0.145 | 0.0103 |
| 2406 | C | 0.623 | 0.1475 |
| 2407 | A | 0.875 | 0.1412 |
| 2408 | A | 0.554 | 0.0954 |
| 2409 | C | 0.226 | 0.0648 |
| 2410 | U | 0.831 | 0.0926 |
| 2411 | G | 0.280 | 0.1375 |
| 2412 | C | -     | 0.0000 |
| 2413 | A | 0.768 | 0.2124 |
| 2414 | A | 0.989 | 0.2010 |
| 2415 | U | 0.497 | 0.1758 |
| 2416 | G | 0.427 | 0.0702 |
| 2417 | U | 1.611 | 0.2585 |
| 2418 | A | 0.555 | 0.1513 |
| 2419 | G | 0.414 | 0.0953 |
| 2420 | U | 0.699 | 0.0597 |
| 2421 | G | 0.477 | 0.0890 |
| 2422 | G | 0.446 | 0.0387 |
| 2423 | U | 0.111 | 0.0126 |
| 2424 | U | 0.315 | 0.0473 |
| 2425 | U | 0.574 | 0.0125 |
| 2426 | A | 0.971 | 0.0869 |
| 2427 | C | 0.381 | 0.0826 |
| 2428 | C | 0.558 | 0.1767 |
| 2429 | G | 0.382 | 0.1208 |
| 2430 | A | 0.531 | 0.0696 |
| 2431 | A | 0.513 | 0.1523 |
| 2432 | C | 0.228 | 0.0436 |
| 2433 | C | 0.532 | 0.2848 |
| 2434 | A | 0.933 | 0.1110 |
| 2435 | U | 0.693 | 0.1404 |
| 2436 | U | 0.634 | 0.0938 |
| 2437 | U | 0.654 | 0.2094 |
| 2438 | A | 0.969 | 0.0719 |
| 2439 | U | 0.690 | 0.1648 |
| 2440 | G | 0.373 | 0.1241 |
| 2441 | G | 0.311 | 0.0566 |
| 2442 | U | 0.245 | 0.1037 |
| 2443 | U | 0.299 | 0.1054 |
| 2444 | C | 0.322 | 0.0711 |
| 2445 | U | 0.209 | 0.1189 |
| 2446 | C | 0.389 | 0.0793 |
| 2447 | U | 0.747 | 0.1490 |
| 2448 | G | 0.583 | 0.1715 |
| 2449 | C | 0.173 | 0.0574 |

|      |   |       |        |
|------|---|-------|--------|
| 2450 | A | 0.721 | 0.1956 |
| 2451 | A | 0.762 | 0.1614 |
| 2452 | U | 0.565 | 0.1385 |
| 2453 | C | 0.380 | 0.1453 |
| 2454 | G | 0.491 | 0.1377 |
| 2455 | A | 0.674 | 0.0808 |
| 2456 | A | 0.695 | 0.0862 |
| 2457 | U | 0.307 | 0.0466 |
| 2458 | U | 0.276 | 0.0532 |
| 2459 | U | 0.592 | 0.0952 |
| 2460 | U | 0.145 | 0.1050 |
| 2461 | C | 0.305 | 0.1043 |
| 2462 | U | 0.534 | 0.0881 |
| 2463 | A | 0.602 | 0.0819 |
| 2464 | C | 0.167 | 0.0714 |
| 2465 | U | 0.285 | 0.0729 |
| 2466 | A | 1.192 | 0.2143 |
| 2467 | U | 0.491 | 0.1153 |
| 2468 | U | 0.436 | 0.1519 |
| 2469 | G | 0.168 | 0.0416 |
| 2470 | U | 0.414 | 0.1056 |
| 2471 | G | 0.265 | 0.0384 |
| 2472 | A | 0.401 | 0.0930 |
| 2473 | G | 0.310 | 0.1227 |
| 2474 | A | 0.909 | 0.1373 |
| 2475 | A | 0.614 | 0.3156 |
| 2476 | A | 0.433 | 0.1729 |
| 2477 | U | 0.119 | 0.1163 |
| 2478 | U | 0.302 | 0.1457 |
| 2479 | C | 0.263 | 0.1636 |
| 2480 | A | 1.003 | 0.5001 |
| 2481 | C | 1.541 | 0.7107 |
| 2482 | U | 0.373 | 0.1998 |
| 2483 | A | 0.631 | 0.1088 |
| 2484 | G | 0.036 | 0.0234 |
| 2485 | C | 0.178 | 0.0329 |
| 2486 | U | 0.191 | 0.0591 |
| 2487 | U | 0.084 | 0.0276 |
| 2488 | C | 0.335 | 0.0892 |
| 2489 | A | 0.689 | 0.0961 |
| 2490 | C | 0.202 | 0.0292 |
| 2491 | C | 0.561 | 0.1296 |
| 2492 | U | 0.318 | 0.0935 |
| 2493 | A | 0.390 | 0.1166 |
| 2494 | A | 0.497 | 0.0640 |
| 2495 | A | 0.445 | 0.1109 |
| 2496 | A | 0.463 | 0.1158 |
| 2497 | G | 0.484 | 0.0939 |
| 2498 | C | 0.113 | 0.0442 |
| 2499 | A | 0.518 | 0.1218 |

|      |   |       |        |
|------|---|-------|--------|
| 2500 | A | 0.509 | 0.0379 |
| 2501 | A | 0.822 | 0.0765 |
| 2502 | A | 0.413 | 0.0913 |
| 2503 | A | 0.600 | 0.0626 |
| 2504 | A | 0.696 | 0.1156 |
| 2505 | U | 0.289 | 0.1215 |
| 2506 | C | 0.290 | 0.0777 |
| 2507 | U | 0.643 | 0.4342 |
| 2508 | G | 0.116 | 0.6628 |
| 2509 | C | 0.544 | 0.1044 |
| 2510 | A | 0.249 | 0.0270 |
| 2511 | A | 0.419 | 0.1201 |
| 2512 | G | 0.514 | 0.0662 |
| 2513 | A | 0.172 | 0.0828 |
| 2514 | C | 0.299 | 0.0583 |
| 2515 | A | 0.493 | 0.0739 |
| 2516 | A | 0.270 | 0.1467 |
| 2517 | C | 0.158 | 0.0601 |
| 2518 | A | 0.753 | 0.0947 |
| 2519 | U | 0.381 | 0.0560 |
| 2520 | G | 0.310 | 0.1761 |
| 2521 | C | 0.208 | 0.0877 |
| 2522 | U | 0.435 | 0.0913 |
| 2523 | G | 0.351 | 0.0852 |
| 2524 | G | 0.086 | 0.1153 |
| 2525 | C | 0.112 | 0.0566 |
| 2526 | U | 0.221 | 0.0391 |
| 2527 | U | 0.266 | 0.0276 |
| 2528 | G | 0.304 | 0.0766 |
| 2529 | G | 0.042 | 0.0170 |
| 2530 | C | 0.303 | 0.0987 |
| 2531 | A | 0.368 | 0.0986 |
| 2532 | G | 0.222 | 0.0815 |
| 2533 | G | -     | 0.0000 |
| 2534 | A | 0.139 | 0.0269 |
| 2535 | C | 0.185 | 0.0501 |
| 2536 | U | 0.350 | 0.0490 |
| 2537 | U | 0.421 | 0.0482 |
| 2538 | G | 0.774 | 0.2383 |
| 2539 | A | 0.543 | 0.1273 |
| 2540 | U | 0.317 | 0.0676 |
| 2541 | A | 0.306 | 0.1049 |
| 2542 | U | 0.343 | 0.1038 |
| 2543 | C | 0.497 | 0.1428 |
| 2544 | A | 0.257 | 0.1350 |
| 2545 | G | 0.108 | 0.0402 |
| 2546 | U | 0.101 | 0.0548 |
| 2547 | A | 0.312 | 0.2628 |
| 2548 | C | 0.410 | 0.4791 |
| 2549 | U | 0.557 | 0.3080 |

|      |   |       |        |
|------|---|-------|--------|
| 2550 | U | 0.372 | 0.0721 |
| 2551 | U | 0.250 | 0.0739 |
| 2552 | G | 0.395 | 0.0771 |
| 2553 | U | 0.240 | 0.0882 |
| 2554 | U | 0.238 | 0.0431 |
| 2555 | A | 1.044 | 0.3040 |
| 2556 | C | 0.894 | 0.2341 |
| 2557 | C | 0.097 | 0.0445 |
| 2558 | U | 0.363 | 0.0978 |
| 2559 | U | 0.368 | 0.0989 |
| 2560 | U | 0.499 | 0.1378 |
| 2561 | C | 0.460 | 0.0798 |
| 2562 | G | 0.425 | 0.1238 |
| 2563 | G | 0.339 | 0.1347 |
| 2564 | U | 0.170 | 0.1208 |
| 2565 | C | 0.282 | 0.0630 |
| 2566 | A | 0.486 | 0.1227 |
| 2567 | A | 0.378 | 0.1732 |
| 2568 | C | 0.234 | 0.1140 |
| 2569 | C | 0.391 | 0.1216 |
| 2570 | U | 0.339 | 0.1984 |
| 2571 | G | 0.448 | 0.2131 |
| 2572 | U | -     | 0.0000 |
| 2573 | U | 0.259 | 0.1792 |
| 2574 | A | 0.611 | 0.0799 |
| 2575 | U | 0.228 | 0.0808 |
| 2576 | C | 0.419 | 0.1075 |
| 2577 | G | 0.368 | 0.1207 |
| 2578 | U | 0.203 | 0.0455 |
| 2579 | C | 0.287 | 0.0754 |
| 2580 | A | 0.575 | 0.1516 |
| 2581 | A | 0.721 | 0.1416 |
| 2582 | U | 0.427 | 0.1360 |
| 2583 | G | 0.519 | 0.1604 |
| 2584 | A | 0.522 | 0.1227 |
| 2585 | U | 0.266 | 0.0715 |
| 2586 | C | 0.901 | 0.1436 |
| 2587 | A | 0.175 | 0.0920 |
| 2588 | C | 0.435 | 0.0968 |
| 2589 | A | 0.199 | 0.0253 |
| 2590 | A | 0.522 | 0.0765 |
| 2591 | C | 0.153 | 0.0627 |
| 2592 | C | 0.205 | 0.0255 |
| 2593 | C | 0.218 | 0.0526 |
| 2594 | U | 0.861 | 0.0804 |
| 2595 | A | 0.790 | 0.0773 |
| 2596 | A | 0.632 | 0.1129 |
| 2597 | C | 0.388 | 0.1749 |
| 2598 | U | 0.688 | 0.2274 |
| 2599 | C | 0.458 | 0.1114 |

|      |   |       |        |
|------|---|-------|--------|
| 2600 | C | 0.592 | 0.0962 |
| 2601 | A | 1.296 | 0.1667 |
| 2602 | A | 0.979 | 0.2182 |
| 2603 | A | 0.913 | 0.1485 |
| 2604 | A | 1.257 | 0.1436 |
| 2605 | U | 1.536 | 0.2742 |
| 2606 | A | 0.746 | 0.1138 |
| 2607 | C | 0.619 | 0.1685 |
| 2608 | A | 0.902 | 0.1277 |
| 2609 | U | 0.424 | 0.0597 |
| 2610 | C | 0.434 | 0.0535 |
| 2611 | C | 0.570 | 0.1042 |
| 2612 | U | 0.170 | 0.0896 |
| 2613 | C | 0.794 | 0.1941 |
| 2614 | G | -     | 0.0000 |
| 2615 | U | 0.800 | 0.1424 |
| 2616 | G | 0.594 | 0.1471 |
| 2617 | G | 0.120 | 0.0444 |
| 2618 | C | 0.361 | 0.0520 |
| 2619 | A | 0.526 | 0.0246 |
| 2620 | U | 0.481 | 0.0743 |
| 2621 | C | 0.212 | 0.1640 |
| 2622 | C | 0.259 | 0.0269 |
| 2623 | C | 0.233 | 0.1979 |
| 2624 | A | 0.147 | 0.0499 |
| 2625 | G | 0.677 | 0.1187 |
| 2626 | G | 1.070 | 0.3924 |
| 2627 | C | -     | 0.0000 |
| 2628 | U | -     | 0.0000 |
| 2629 | A | 0.488 | 0.9184 |
| 2630 | C | 0.492 | 0.1458 |
| 2631 | G | -     | 0.0000 |
| 2632 | C | 0.574 | 0.1399 |
| 2633 | U | 0.256 | 0.1622 |
| 2634 | C | 0.400 | 0.1080 |
| 2635 | U | 1.024 | 0.0721 |
| 2636 | A | 0.517 | 0.0925 |
| 2637 | C | 0.733 | 0.1857 |
| 2638 | A | 0.476 | 0.0984 |
| 2639 | U | 0.576 | 0.1190 |
| 2640 | C | 0.313 | 0.0669 |
| 2641 | C | 0.586 | 0.0643 |
| 2642 | G | 0.423 | 0.0411 |
| 2643 | U | 0.273 | 0.0499 |
| 2644 | C | 0.533 | 0.0662 |
| 2645 | U | 0.360 | 0.0561 |
| 2646 | C | 0.580 | 0.0137 |
| 2647 | G | 0.320 | 0.0312 |
| 2648 | A | 0.984 | 0.0410 |
| 2649 | A | 0.809 | 0.0177 |

|      |   |       |        |
|------|---|-------|--------|
| 2650 | A | 0.785 | 0.0300 |
| 2651 | C | 0.275 | 0.0286 |
| 2652 | U | 0.562 | 0.0342 |
| 2653 | C | 0.642 | 0.0464 |
| 2654 | U | 1.095 | 0.1528 |
| 2655 | U | 0.755 | 0.0703 |
| 2656 | A | 0.921 | 0.0718 |
| 2657 | U | 0.686 | 0.0878 |
| 2658 | G | 0.396 | 0.0666 |
| 2659 | G | 0.361 | 0.0384 |
| 2660 | A | 0.602 | 0.0641 |
| 2661 | U | 0.508 | 0.0573 |
| 2662 | A | 0.505 | 0.0488 |
| 2663 | U | 1.214 | 0.1253 |
| 2664 | A | 0.971 | 0.0525 |
| 2665 | U | 0.248 | 0.0335 |
| 2666 | C | 0.442 | 0.0566 |
| 2667 | A | 0.896 | 0.0352 |
| 2668 | U | 0.430 | 0.0687 |
| 2669 | C | 0.219 | 0.0655 |
| 2670 | U | 0.437 | 0.0517 |
| 2671 | A | 0.938 | 0.0495 |
| 2672 | U | 0.291 | 0.0558 |
| 2673 | C | 0.467 | 0.0388 |
| 2674 | U | 0.471 | 0.0293 |
| 2675 | U | 0.521 | 0.0492 |
| 2676 | C | 0.072 | 0.0049 |
| 2677 | C | 0.172 | 0.0240 |
| 2678 | A | 1.122 | 0.0997 |
| 2679 | U | 0.467 | 0.1028 |
| 2680 | C | 0.545 | 0.1602 |
| 2681 | C | 0.706 | 0.1704 |
| 2682 | U | 0.503 | 0.0932 |
| 2683 | U | 0.414 | 0.0343 |
| 2684 | A | 1.010 | 0.0399 |
| 2685 | A | 1.155 | 0.0615 |
| 2686 | A | 0.442 | 0.0448 |
| 2687 | G | 0.833 | 0.0049 |
| 2688 | A | 0.637 | 0.0411 |
| 2689 | A | 0.468 | 0.0553 |
| 2690 | G | 0.227 | 0.0141 |
| 2691 | A | 0.680 | 0.0160 |
| 2692 | C | 0.655 | 0.0331 |
| 2693 | A | 0.418 | 0.0306 |
| 2694 | G | 0.411 | 0.0330 |
| 2695 | U | 0.390 | 0.0416 |
| 2696 | A | 0.878 | 0.0520 |
| 2697 | G | 0.489 | 0.0170 |
| 2698 | A | 0.601 | 0.0083 |
| 2699 | U | 0.870 | 0.0425 |

|      |   |       |        |
|------|---|-------|--------|
| 2700 | A | 0.483 | 0.0388 |
| 2701 | C | 0.581 | 0.0872 |
| 2702 | A | 1.144 | 0.0733 |
| 2703 | A | 1.109 | 0.0872 |
| 2704 | C | 0.174 | 0.0672 |
| 2705 | U | 0.683 | 0.0619 |
| 2706 | A | 1.171 | 0.1223 |
| 2707 | A | 0.909 | 0.0547 |
| 2708 | C | 0.286 | 0.0333 |
| 2709 | U | 0.805 | 0.0543 |
| 2710 | A | 0.913 | 0.0537 |
| 2711 | U | 0.540 | 0.0550 |
| 2712 | G | 0.438 | 0.0717 |
| 2713 | U | 0.541 | 0.0682 |
| 2714 | U | 0.575 | 0.0968 |
| 2715 | A | 1.186 | 0.1459 |
| 2716 | U | 0.552 | 0.1658 |
| 2717 | U | 0.405 | 0.2186 |
| 2718 | C | 0.611 | 0.1955 |
| 2719 | U | 0.614 | 0.0071 |
| 2720 | U | 0.321 | 0.0544 |
| 2721 | C | 0.523 | 0.0630 |
| 2722 | A | 0.980 | 0.0544 |
| 2723 | G | 0.516 | 0.0655 |
| 2724 | G | 0.468 | 0.0951 |
| 2725 | G | 0.185 | 0.1040 |
| 2726 | C | 0.379 | 0.0560 |
| 2727 | A | 0.832 | 0.1088 |
| 2728 | A | 1.058 | 0.1849 |
| 2729 | G | 0.313 | 0.0905 |
| 2730 | G | 0.376 | 0.0373 |
| 2731 | A | 0.435 | 0.0266 |
| 2732 | A | 0.686 | 0.1033 |
| 2733 | U | 0.207 | 0.0355 |
| 2734 | C | 0.213 | 0.0631 |
| 2735 | C | 0.394 | 0.1573 |
| 2736 | A | 1.012 | 0.2104 |
| 2737 | G | 0.834 | 0.1404 |
| 2738 | A | 0.602 | 0.1241 |
| 2739 | U | 0.627 | 0.1279 |
| 2740 | U | 0.797 | 0.1157 |
| 2741 | A | 0.815 | 0.1028 |
| 2742 | G | 0.561 | 0.0866 |
| 2743 | A | 0.792 | 0.0944 |
| 2744 | U | 0.509 | 0.0477 |
| 2745 | C | 0.636 | 0.0916 |
| 2746 | A | 0.861 | 0.0795 |
| 2747 | A | 1.098 | 0.7865 |
| 2748 | U | 0.723 | 0.2897 |
| 2749 | U | 0.480 | 0.1535 |

|      |   |       |        |
|------|---|-------|--------|
| 2750 | C | 0.644 | 0.1472 |
| 2751 | A | 1.042 | 0.3557 |
| 2752 | A | 0.520 | 0.1995 |
| 2753 | U | 0.312 | 0.0767 |
| 2754 | U | 1.419 | 0.5961 |
| 2755 | A | 0.928 | 0.4360 |
| 2756 | C | 1.056 | 0.6464 |
| 2757 | G | 0.288 | 0.0911 |
| 2758 | A | 0.544 | 0.3919 |
| 2759 | C | 0.401 | 0.3304 |
| 2760 | G | 0.231 | 0.0385 |
| 2761 | C | 0.268 | 0.2541 |
| 2762 | A | 0.410 | 0.0927 |
| 2763 | C | 0.262 | 0.1252 |
| 2764 | U | 0.369 | 0.1573 |
| 2765 | C | 0.569 | 0.2518 |
| 2766 | A | 0.528 | 0.1281 |
| 2767 | C | 0.169 | 0.0178 |
| 2768 | U | 0.233 | 0.0728 |
| 2769 | U | 0.455 | 0.1010 |
| 2770 | U | 0.379 | 0.1203 |
| 2771 | C | 0.323 | 0.0848 |
| 2772 | G | 0.264 | 0.1545 |
| 2773 | A | 0.378 | 0.1384 |
| 2774 | U | 0.201 | 0.0909 |
| 2775 | G | 0.332 | 0.0984 |
| 2776 | A | 0.080 | 0.0180 |
| 2777 | A | 0.376 | 0.1028 |
| 2778 | G | 0.137 | 0.0430 |
| 2779 | A | 0.430 | 0.1337 |
| 2780 | C | 0.132 | 0.0522 |
| 2781 | U | 0.550 | 0.2052 |
| 2782 | U | 0.791 | 0.2044 |
| 2783 | A | 0.599 | 0.1784 |
| 2784 | A | 0.755 | 0.3340 |
| 2785 | A | 1.149 | 0.4596 |
| 2786 | C | 0.362 | 0.1656 |
| 2787 | C | 0.800 | 0.3332 |
| 2788 | G | 0.670 | 0.2397 |
| 2789 | U | 0.344 | 0.1800 |
| 2790 | U | 0.291 | 0.1428 |
| 2791 | U | 0.332 | 0.1616 |
| 2792 | A | 0.812 | 0.2317 |
| 2793 | A | 0.448 | 0.1267 |
| 2794 | C | 0.123 | 0.0578 |
| 2795 | U | 0.529 | 0.1493 |
| 2796 | G | 0.198 | 0.0514 |
| 2797 | C | 0.168 | 0.0810 |
| 2798 | U | 0.257 | 0.1191 |
| 2799 | U | 0.334 | 0.3425 |



|      |   |       |        |
|------|---|-------|--------|
| 2800 | C | 0.322 | 0.2025 |
| 2801 | A | 0.320 | 0.0635 |
| 2802 | U | 0.163 | 0.0600 |
| 2803 | A | 0.552 | 0.2606 |
| 2804 | U | 0.406 | 0.3279 |
| 2805 | C | 0.319 | 0.0538 |
| 2806 | A | 0.320 | 0.0677 |
| 2807 | U | 0.261 | 0.0403 |
| 2808 | U | 0.451 | 0.1652 |
| 2809 | C | 0.395 | 0.0936 |
| 2810 | G | 0.331 | 0.1671 |
| 2811 | U | 0.304 | 0.1036 |
| 2812 | U | 0.244 | 0.0721 |
| 2813 | C | 0.398 | 0.0719 |
| 2814 | A | 0.298 | 0.0547 |
| 2815 | U | 0.172 | 0.1026 |
| 2816 | U | 0.300 | 0.0507 |
| 2817 | G | 0.084 | 0.0551 |
| 2818 | C | 0.181 | 0.1013 |
| 2819 | G | 0.358 | 0.1621 |
| 2820 | U | 0.177 | 0.0343 |
| 2821 | C | 0.289 | 0.0501 |
| 2822 | A | 0.370 | 0.0702 |
| 2823 | A | 0.577 | 0.1421 |
| 2824 | A | 0.425 | 0.1071 |
| 2825 | U | 0.821 | 0.4060 |
| 2826 | G | 0.594 | 0.1685 |
| 2827 | A | 0.173 | 0.0478 |
| 2828 | G | 0.193 | 0.0531 |
| 2829 | A | 0.399 | 0.1053 |
| 2830 | U | 0.136 | 0.0446 |
| 2831 | C | 0.064 | 0.0085 |
| 2832 | C | 0.309 | 0.0760 |
| 2833 | A | 0.508 | 0.1063 |
| 2834 | A | 0.859 | 0.2070 |
| 2835 | G | 0.462 | 0.1153 |
| 2836 | A | 0.791 | 0.1036 |
| 2837 | A | 0.839 | 0.2691 |
| 2838 | U | 0.468 | 0.3037 |
| 2839 | C | 0.271 | 0.0797 |
| 2840 | C | 0.274 | 0.0909 |
| 2841 | A | 0.473 | 0.1059 |
| 2842 | A | 0.539 | 0.1096 |
| 2843 | U | 0.293 | 0.1754 |
| 2844 | G | 1.035 | 0.7142 |
| 2845 | A | 0.438 | 0.0512 |
| 2846 | U | 0.285 | 0.0428 |
| 2847 | C | 1.167 | 1.2652 |
| 2848 | U | 0.480 | 0.3877 |
| 2849 | U | 0.479 | 0.9624 |

|      |   |       |        |
|------|---|-------|--------|
| 2850 | A | 0.618 | 0.3448 |
| 2851 | A | 0.693 | 0.0391 |
| 2852 | C | 0.403 | 0.0838 |
| 2853 | A | 0.707 | 0.0657 |
| 2854 | U | 0.801 | 0.1826 |
| 2855 | A | 0.986 | 0.0691 |
| 2856 | G | 0.507 | 0.0850 |
| 2857 | A | 0.581 | 0.0894 |
| 2858 | A | 0.426 | 0.0376 |
| 2859 | U | 0.348 | 0.0737 |
| 2860 | C | 0.156 | 0.0595 |
| 2861 | U | 0.383 | 0.1346 |
| 2862 | G | 0.220 | 0.0127 |
| 2863 | A | 0.454 | 0.0775 |
| 2864 | C | 0.036 | 0.0113 |
| 2865 | C | 0.566 | 0.2316 |
| 2866 | A | 0.432 | 0.1616 |
| 2867 | U | 0.378 | 0.0809 |
| 2868 | G | 0.549 | 0.0889 |
| 2869 | A | 0.268 | 0.0980 |
| 2870 | C | 0.238 | 0.0555 |
| 2871 | U | 0.351 | 0.0351 |
| 2872 | U | 0.365 | 0.0084 |
| 2873 | C | 0.299 | 0.0571 |
| 2874 | C | 0.280 | 0.0323 |
| 2875 | A | 0.455 | 0.1357 |
| 2876 | A | 0.412 | 0.0380 |
| 2877 | U | 0.420 | 0.0705 |
| 2878 | C | 0.274 | 0.1730 |
| 2879 | C | 0.363 | 0.0439 |
| 2880 | G | 0.597 | 0.1725 |
| 2881 | A | 0.525 | 0.1265 |
| 2882 | C | 0.280 | 0.1677 |
| 2883 | A | 0.776 | 0.0860 |
| 2884 | U | 0.671 | 0.0873 |
| 2885 | U | 0.228 | 0.1227 |
| 2886 | G | 0.344 | 0.0792 |
| 2887 | A | 0.791 | 0.0774 |
| 2888 | A | 0.442 | 0.1217 |
| 2889 | C | 0.361 | 0.0670 |
| 2890 | U | 0.897 | 0.0248 |
| 2891 | A | 0.224 | 0.1732 |
| 2892 | C | 0.456 | 0.0577 |
| 2893 | A | 0.577 | 0.1820 |
| 2894 | U | 0.289 | 0.1402 |
| 2895 | C | 0.344 | 0.0440 |
| 2896 | C | 0.305 | 0.0931 |
| 2897 | U | 0.669 | 0.2277 |
| 2898 | G | 0.729 | 0.2573 |
| 2899 | A | 0.902 | 0.5166 |

|      |   |       |        |
|------|---|-------|--------|
| 2900 | G | 0.201 | 0.0892 |
| 2901 | C | 0.309 | 0.1556 |
| 2902 | A | 0.684 | 0.1170 |
| 2903 | A | 0.867 | 0.0907 |
| 2904 | C | 0.175 | 0.1302 |
| 2905 | C | 0.361 | 0.1447 |
| 2906 | G | 0.572 | 0.2276 |
| 2907 | A | 0.849 | 0.2050 |
| 2908 | G | 0.682 | 0.0434 |
| 2909 | A | 0.605 | 0.0924 |
| 2910 | A | 0.883 | 0.1240 |
| 2911 | A | 0.520 | 0.1453 |
| 2912 | U | 0.235 | 0.0908 |
| 2913 | G | 0.415 | 0.1817 |
| 2914 | U | 0.247 | 0.1383 |
| 2915 | C | 0.305 | 0.0737 |
| 2916 | C | 0.370 | 0.0233 |
| 2917 | U | 0.416 | 0.0946 |
| 2918 | U | 0.671 | 0.1572 |
| 2919 | U | 0.607 | 0.0806 |
| 2920 | C | 0.351 | 0.2091 |
| 2921 | A | 0.764 | 0.0785 |
| 2922 | A | 0.876 | 0.2786 |
| 2923 | A | 0.890 | 0.1106 |
| 2924 | A | 0.710 | 0.5184 |
| 2925 | G | 0.417 | 0.0753 |
| 2926 | C | 0.247 | 0.1391 |
| 2927 | U | -     | 0.0000 |
| 2928 | G | 0.313 | 0.2217 |
| 2929 | U | 0.498 | 0.0464 |
| 2930 | G | 0.525 | 0.2071 |
| 2931 | A | 0.544 | 0.0731 |
| 2932 | G | 0.381 | 0.0346 |
| 2933 | U | 0.388 | 0.0829 |
| 2934 | C | 0.144 | 0.0722 |
| 2935 | C | 0.429 | 0.0651 |
| 2936 | A | 0.685 | 0.1015 |
| 2937 | A | 0.736 | 0.1473 |
| 2938 | C | 0.405 | 0.0968 |
| 2939 | C | 0.595 | 0.0339 |
| 2940 | G | 0.651 | 0.0877 |
| 2941 | A | 0.298 | 0.0552 |
| 2942 | U | 0.511 | 0.1676 |
| 2943 | U | 0.355 | 0.0512 |
| 2944 | C | 0.350 | 0.0562 |
| 2945 | C | 0.645 | 0.0922 |
| 2946 | A | 0.267 | 0.0600 |
| 2947 | C | 0.470 | 0.1069 |
| 2948 | A | 0.471 | 0.0884 |
| 2949 | C | 0.086 | 0.0670 |

|      |   |       |        |
|------|---|-------|--------|
| 2950 | C | 0.156 | 0.0420 |
| 2951 | U | 0.722 | 0.1714 |
| 2952 | C | 0.411 | 0.0609 |
| 2953 | C | 0.497 | 0.0789 |
| 2954 | G | 0.450 | 0.1191 |
| 2955 | U | 0.168 | 0.0104 |
| 2956 | C | 0.580 | 0.0335 |
| 2957 | A | 0.298 | 0.0258 |
| 2958 | A | 0.487 | 0.1285 |
| 2959 | C | 1.261 | 0.4596 |
| 2960 | U | 0.494 | 0.2814 |
| 2961 | C | 0.581 | 0.1202 |
| 2962 | A | 0.573 | 0.0800 |
| 2963 | U | 0.353 | 0.0827 |
| 2964 | A | 0.753 | 0.0735 |
| 2965 | C | 0.367 | 0.1276 |
| 2966 | U | 0.389 | 0.1000 |
| 2967 | G | 0.458 | 0.0205 |
| 2968 | A | 0.507 | 0.1062 |
| 2969 | A | 0.870 | 0.1656 |
| 2970 | G | 0.501 | 0.0471 |
| 2971 | A | 0.471 | 0.1190 |
| 2972 | U | 0.210 | 0.2065 |
| 2973 | U | 1.439 | 1.9725 |
| 2974 | C | 0.701 | 0.1631 |
| 2975 | G | 0.425 | 0.0616 |
| 2976 | A | 0.390 | 0.2009 |
| 2977 | A | 0.789 | 0.1478 |
| 2978 | A | 0.555 | 0.1169 |
| 2979 | C | 0.519 | 0.1295 |
| 2980 | G | 0.391 | 0.0450 |
| 2981 | U | 0.555 | 0.1402 |
| 2982 | G | 0.279 | 0.0133 |
| 2983 | U | 0.334 | 0.0748 |
| 2984 | U | 0.529 | 0.0623 |
| 2985 | U | 0.518 | 0.1141 |
| 2986 | C | 0.585 | 0.0691 |
| 2987 | U | 0.978 | 0.2557 |
| 2988 | A | 0.710 | 0.1400 |
| 2989 | A | 0.997 | 0.2753 |
| 2990 | A | 0.712 | 0.1745 |
| 2991 | A | 0.788 | 0.1314 |
| 2992 | C | 0.338 | 0.1046 |
| 2993 | C | 0.493 | 0.1537 |
| 2994 | A | 1.007 | 0.1108 |
| 2995 | A | 1.125 | 0.3618 |
| 2996 | U | 0.642 | 0.0531 |
| 2997 | A | 1.058 | 0.2787 |
| 2998 | U | 0.451 | 0.1678 |
| 2999 | U | 0.406 | 0.1412 |

|      |   |       |        |
|------|---|-------|--------|
| 3000 | C | 0.507 | 0.1732 |
| 3001 | G | 0.411 | 0.0966 |
| 3002 | C | 1.619 | 0.2889 |
| 3003 | G | 0.520 | 0.0935 |
| 3004 | C | 0.452 | 0.0619 |
| 3005 | A | 0.548 | 0.1086 |
| 3006 | C | 0.251 | 0.0403 |
| 3007 | C | 0.193 | 0.1074 |
| 3008 | C | 0.413 | 0.1076 |
| 3009 | A | 0.954 | 0.1363 |
| 3010 | G | 0.682 | 0.0805 |
| 3011 | A | 0.574 | 0.1105 |
| 3012 | G | 0.620 | 0.1347 |
| 3013 | A | 0.740 | 0.1688 |
| 3014 | A | 0.892 | 0.1134 |
| 3015 | G | 0.554 | 0.1105 |
| 3016 | U | 0.327 | 0.0764 |
| 3017 | U | 0.332 | 0.0855 |
| 3018 | G | 0.452 | 0.0670 |
| 3019 | A | 0.413 | 0.2051 |
| 3020 | C | 0.251 | 0.0520 |
| 3021 | C | 0.226 | 0.0876 |
| 3022 | C | 0.141 | 0.1450 |
| 3023 | C | 0.297 | 0.1523 |
| 3024 | A | 1.144 | 0.2172 |
| 3025 | A | 0.484 | 0.3221 |
| 3026 | C | 0.692 | 0.3615 |
| 3027 | A | 0.768 | 0.0264 |
| 3028 | U | 0.613 | 0.3375 |
| 3029 | A | 0.829 | 0.2236 |
| 3030 | U | 0.616 | 0.3701 |
| 3031 | C | 0.276 | 0.1926 |
| 3032 | U | 0.811 | 0.4348 |
| 3033 | G | 0.580 | 0.2174 |
| 3034 | A | 0.792 | 0.4525 |
| 3035 | A | 0.947 | 0.3881 |
| 3036 | U | 0.556 | 0.0343 |
| 3037 | C | 0.421 | 0.2405 |
| 3038 | U | 1.329 | 0.6126 |
| 3039 | A | 1.002 | 0.3949 |
| 3040 | A | 1.133 | 0.4612 |
| 3041 | U | 0.583 | 0.1667 |
| 3042 | A | 0.951 | 0.5138 |
| 3043 | U | 0.537 | 0.3120 |
| 3044 | U | 0.251 | 0.0562 |
| 3045 | C | 0.229 | 0.0870 |
| 3046 | U | 0.340 | 0.0811 |
| 3047 | U | 0.550 | 0.1118 |
| 3048 | C | 0.132 | 0.0267 |
| 3049 | C | 0.411 | 0.0622 |

|      |   |       |        |
|------|---|-------|--------|
| 3050 | A | 1.330 | 0.1786 |
| 3051 | U | 0.841 | 0.0891 |
| 3052 | C | 0.702 | 0.0576 |
| 3053 | A | 1.030 | 0.0971 |
| 3054 | A | 1.077 | 0.2004 |
| 3055 | A | 2.488 | 0.1509 |
| 3056 | G | -     | 0.0000 |
| 3057 | A | 0.845 | 0.0241 |
| 3058 | A | 1.072 | 0.1398 |
| 3059 | G | 0.702 | 0.1353 |
| 3060 | A | 0.475 | 0.0771 |
| 3061 | G | 0.648 | 0.0596 |
| 3062 | A | 0.613 | 0.1374 |
| 3063 | U | 0.310 | 0.0474 |
| 3064 | C | 1.443 | 0.1867 |
| 3065 | U | -     | 0.0000 |
| 3066 | A | 0.804 | 0.1867 |
| 3067 | G | 0.162 | 0.0455 |
| 3068 | C | 0.421 | 0.0579 |
| 3069 | A | 0.343 | 0.0381 |
| 3070 | C | 0.192 | 0.0416 |
| 3071 | C | 0.349 | 0.1352 |
| 3072 | C | 0.463 | 0.0641 |
| 3073 | C | 0.311 | 0.0592 |
| 3074 | C | 0.475 | 0.0181 |
| 3075 | C | 0.509 | 0.1468 |
| 3076 | A | 0.602 | 0.1812 |
| 3077 | A | 0.855 | 0.2054 |
| 3078 | A | 0.595 | 0.1852 |
| 3079 | U | 0.292 | 0.1871 |
| 3080 | U | 0.445 | 0.2067 |
| 3081 | U | 0.469 | 0.1401 |
| 3082 | C | 0.232 | 0.1148 |
| 3083 | C | 0.276 | 0.1144 |
| 3084 | A | 0.837 | 0.2035 |
| 3085 | A | 0.541 | 0.1381 |
| 3086 | U | 0.523 | 0.2010 |
| 3087 | A | 0.884 | 0.1763 |
| 3088 | U | 0.592 | 0.1522 |
| 3089 | C | 0.664 | 0.1037 |
| 3090 | G | 0.465 | 0.1484 |
| 3091 | A | 0.744 | 0.2014 |
| 3092 | G | 0.690 | 0.0896 |
| 3093 | A | 0.269 | 0.0637 |
| 3094 | G | 0.090 | 0.0314 |
| 3095 | U | 0.363 | 0.1201 |
| 3096 | A | 0.374 | 0.1577 |
| 3097 | C | 0.116 | 0.0315 |
| 3098 | C | 0.574 | 0.0799 |
| 3099 | G | 0.268 | 0.0587 |

|      |   |       |        |
|------|---|-------|--------|
| 3100 | G | 0.244 | 0.0717 |
| 3101 | U | 0.302 | 0.0398 |
| 3102 | U | 0.399 | 0.2057 |
| 3103 | C | 0.379 | 0.1182 |
| 3104 | G | 0.344 | 0.1302 |
| 3105 | G | 0.221 | 0.0955 |
| 3106 | G | 0.257 | 0.0460 |
| 3107 | U | 0.265 | 0.0223 |
| 3108 | G | 0.107 | 0.0255 |
| 3109 | G | 0.041 | 0.0209 |
| 3110 | U | 0.184 | 0.0803 |
| 3111 | A | 0.272 | 0.0315 |
| 3112 | U | 0.286 | 0.0976 |
| 3113 | G | 0.244 | 0.1389 |
| 3114 | C | 0.170 | 0.0301 |
| 3115 | A | 0.361 | 0.0463 |
| 3116 | U | 0.453 | 0.0000 |
| 3117 | A | 0.490 | 0.1450 |
| 3118 | A | 0.496 | 0.1153 |
| 3119 | A | 0.439 | 0.0626 |
| 3120 | U | 0.336 | 0.1195 |
| 3121 | U | 0.463 | 0.1513 |
| 3122 | A | 0.732 | 0.1821 |
| 3123 | A | 0.584 | 0.0000 |
| 3124 | A | 0.596 | 0.0293 |
| 3125 | U | 0.441 | 0.0071 |
| 3126 | G | 0.251 | 0.0481 |
| 3127 | U | 0.153 | 0.0095 |
| 3128 | U | 0.258 | 0.0410 |
| 3129 | C | 0.189 | 0.0247 |
| 3130 | C | 0.316 | 0.0244 |
| 3131 | U | 0.192 | 0.0923 |
| 3132 | U | 0.401 | 0.0216 |
| 3133 | U | 0.461 | 0.0276 |
| 3134 | A | 0.595 | 0.0095 |
| 3135 | C | 0.189 | 0.0612 |
| 3136 | U | 0.444 | 0.0297 |
| 3137 | U | 0.510 | 0.0516 |
| 3138 | G | 0.166 | 0.0156 |
| 3139 | C | 0.200 | 0.0293 |
| 3140 | U | 0.194 | 0.0997 |
| 3141 | C | 0.165 | 0.1103 |
| 3142 | C | 0.061 | 0.0106 |
| 3143 | C | 0.306 | 0.2029 |
| 3144 | A | 0.358 | 0.1167 |
| 3145 | U | 0.389 | 0.0651 |
| 3146 | G | 0.241 | 0.0403 |
| 3147 | U | 0.238 | 0.1393 |
| 3148 | C | 0.074 | 0.0481 |
| 3149 | C | -     | 0.0000 |

|      |   |       |        |
|------|---|-------|--------|
| 3150 | C | 0.195 | 0.0127 |
| 3151 | A | 0.688 | 0.2022 |
| 3152 | A | 0.471 | 0.1471 |
| 3153 | U | 0.304 | 0.1117 |
| 3154 | C | 0.128 | 0.0318 |
| 3155 | U | 0.631 | 0.1096 |
| 3156 | A | 0.478 | 0.0877 |
| 3157 | A | 0.698 | 0.0707 |
| 3158 | C | 0.266 | 0.0622 |
| 3159 | A | 0.565 | 0.0212 |
| 3160 | C | 0.461 | 0.0587 |
| 3161 | A | 0.566 | 0.0742 |
| 3162 | C | 0.523 | 0.0247 |
| 3163 | A | 0.311 | 0.0410 |
| 3164 | U | 0.670 | 0.0000 |
| 3165 | G | 0.333 | 0.1032 |
| 3166 | A | 0.154 | 0.0325 |
| 3167 | G | 0.348 | 0.1160 |
| 3168 | U | 0.058 | 0.0000 |
| 3169 | C | 0.278 | 0.0191 |
| 3170 | G | 0.353 | 0.1534 |
| 3171 | U | 0.512 | 0.0255 |
| 3172 | C | 0.215 | 0.1146 |
| 3173 | G | 0.078 | 0.0573 |
| 3174 | C | 0.354 | 0.0106 |
| 3175 | A | 0.569 | 0.1485 |
| 3176 | C | 0.371 | 0.1273 |
| 3177 | G | 0.129 | 0.0042 |
| 3178 | C | 0.351 | 0.2510 |
| 3179 | C | 0.255 | 0.0651 |
| 3180 | A | 0.704 | 0.1421 |
| 3181 | G | 0.272 | 0.0665 |
| 3182 | U | 0.682 | 0.0262 |
| 3183 | A | 0.247 | 0.0841 |
| 3184 | A | 0.445 | 0.0339 |
| 3185 | A | 0.483 | 0.0071 |
| 3186 | U | 0.280 | 0.1018 |
| 3187 | C | 0.318 | 0.1612 |
| 3188 | U | 0.425 | 0.1442 |
| 3189 | A | 1.025 | 0.2638 |
| 3190 | A | 1.051 | 0.1294 |
| 3191 | A | 0.793 | 0.0834 |
| 3192 | G | 0.395 | 0.1230 |
| 3193 | A | 0.530 | 0.3486 |
| 3194 | U | 0.216 | 0.2029 |
| 3195 | U | 0.116 | 0.0771 |
| 3196 | U | 0.328 | 0.2546 |
| 3197 | C | 0.202 | 0.1421 |
| 3198 | A | 0.809 | 0.1874 |
| 3199 | G | 0.113 | 0.1421 |



|      |   |       |        |
|------|---|-------|--------|
| 3200 | A | 0.438 | 0.2581 |
| 3201 | C | 0.110 | 0.0771 |
| 3202 | A | 0.458 | 0.1761 |
| 3203 | C | 0.177 | 0.1520 |
| 3204 | U | 0.205 | 0.1138 |
| 3205 | C | 0.167 | 0.0488 |
| 3206 | A | 0.603 | 0.1987 |
| 3207 | G | 0.365 | 0.1838 |
| 3208 | A | 0.299 | 0.0000 |
| 3209 | C | 0.139 | 0.0000 |
| 3210 | U | 0.439 | 0.2814 |
| 3211 | C | 0.187 | 0.2425 |
| 3212 | G | 0.219 | 0.1803 |
| 3213 | U | 0.485 | 0.1379 |
| 3214 | A | 0.222 | 0.2107 |
| 3215 | C | 0.173 | 0.1690 |
| 3216 | A | 0.566 | 0.0396 |
| 3217 | G | 0.315 | 0.1937 |
| 3218 | U | 0.465 | 0.0742 |
| 3219 | G | 0.389 | 0.0325 |
| 3220 | A | 0.559 | 0.1598 |
| 3221 | A | 0.538 | 0.1520 |
| 3222 | A | 0.821 | 0.1478 |
| 3223 | A | 0.223 | 0.1039 |
| 3224 | U | 0.499 | 0.0127 |
| 3225 | G | 0.198 | 0.0445 |
| 3226 | A | 0.707 | 0.0834 |
| 3227 | G | 0.426 | 0.0559 |
| 3228 | A | 0.656 | 0.2150 |
| 3229 | C | 0.512 | 0.0721 |
| 3230 | U | 0.486 | 0.0820 |
| 3231 | A | 0.700 | 0.2489 |
| 3232 | A | 0.906 | 0.1322 |
| 3233 | U | 0.460 | 0.1563 |
| 3234 | C | 0.354 | 0.1209 |
| 3235 | A | 0.738 | 0.1754 |
| 3236 | U | 0.454 | 0.0856 |
| 3237 | A | 1.120 | 0.1124 |
| 3238 | C | 0.270 | 0.2715 |
| 3239 | A | 0.640 | 0.2567 |
| 3240 | A | 0.839 | 0.0000 |
| 3241 | A | 0.747 | 0.0849 |
| 3242 | C | 0.271 | 0.1633 |
| 3243 | G | 0.194 | 0.0544 |
| 3244 | U | 0.072 | 0.1004 |
| 3245 | A | 0.369 | 0.0368 |
| 3246 | C | 0.258 | 0.1541 |
| 3247 | C | 0.368 | 0.0389 |
| 3248 | A | 1.112 | 0.1831 |
| 3249 | A | 0.721 | 0.3585 |

|      |   |       |        |
|------|---|-------|--------|
| 3250 | U | 0.689 | 0.0346 |
| 3251 | A | 1.201 | 0.3861 |
| 3252 | U | 0.211 | 0.0721 |
| 3253 | C | 0.204 | 0.0346 |
| 3254 | C | 0.795 | 0.1435 |
| 3255 | A | 0.836 | 0.2864 |
| 3256 | G | 0.495 | 0.0714 |
| 3257 | U | 0.610 | 0.0764 |
| 3258 | A | 0.926 | 0.1619 |
| 3259 | C | 0.581 | 0.0177 |
| 3260 | G | 0.530 | 0.1237 |
| 3261 | G | 0.470 | 0.0134 |
| 3262 | G | 0.328 | 0.0495 |
| 3263 | U | 0.725 | 0.0000 |
| 3264 | G | 0.097 | 0.0651 |
| 3265 | G | 0.138 | 0.0057 |
| 3266 | U | 0.252 | 0.1103 |
| 3267 | A | 0.534 | 0.1598 |
| 3268 | C | 0.194 | 0.1966 |
| 3269 | C | 0.295 | 0.1372 |
| 3270 | A | 1.017 | 0.0948 |
| 3271 | A | 0.541 | 0.2553 |
| 3272 | C | 0.321 | 0.0460 |
| 3273 | A | 0.896 | 0.0000 |
| 3274 | A | 1.023 | 0.0106 |
| 3275 | C | 0.724 | 0.1047 |
| 3276 | A | 0.691 | 0.2496 |
| 3277 | A | 1.161 | 0.3175 |
| 3278 | A | 0.939 | 0.1810 |
| 3279 | A | 0.555 | 0.0368 |
| 3280 | C | 0.496 | 0.2164 |
| 3281 | U | 0.656 | 0.0276 |
| 3282 | G | 0.128 | 0.1655 |
| 3283 | U | 0.442 | 0.0304 |
| 3284 | U | 0.309 | 0.0438 |
| 3285 | C | 0.377 | 0.1365 |
| 3286 | C | 0.643 | 0.0021 |
| 3287 | G | 0.377 | 0.1110 |
| 3288 | C | 0.462 | 0.0354 |
| 3289 | A | 0.974 | 0.0064 |
| 3290 | G | 0.761 | 0.1216 |
| 3291 | A | 0.636 | 0.0212 |
| 3292 | U | 0.734 | 0.0255 |
| 3293 | A | 0.834 | 0.1301 |
| 3294 | A | 1.164 | 0.1075 |
| 3295 | G | 0.133 | 0.0997 |
| 3296 | U | 0.371 | 0.1570 |
| 3297 | G | 0.400 | 0.0148 |
| 3298 | A | 0.491 | 0.2737 |
| 3299 | C | 0.251 | 0.0000 |

|      |   |       |        |
|------|---|-------|--------|
| 3300 | C | 0.586 | 0.0933 |
| 3301 | A | 0.441 | 0.2574 |
| 3302 | A | 1.098 | 0.2079 |
| 3303 | G | 0.222 | 0.0000 |
| 3304 | A | 0.380 | 0.2623 |
| 3305 | G | 0.450 | 0.0375 |
| 3306 | A | 0.487 | 0.4568 |
| 3307 | C | 0.109 | 0.1294 |
| 3308 | U | 0.391 | 0.1308 |
| 3309 | G | 0.427 | 0.2956 |
| 3310 | A | 0.611 | 0.0127 |
| 3311 | G | 0.460 | 0.2751 |
| 3312 | A | 0.462 | 0.2942 |
| 3313 | A | 0.383 | 0.3868 |
| 3314 | A | 0.433 | 0.3769 |
| 3315 | A | 0.556 | 0.1718 |
| 3316 | G | 0.423 | 0.2595 |
| 3317 | G | 0.301 | 0.1853 |
| 3318 | A | 0.581 | 0.2270 |
| 3319 | U | 0.530 | 0.1640 |
| 3320 | U | 0.571 | 0.0742 |
| 3321 | A | 1.220 | 0.2206 |
| 3322 | U | 1.073 | 0.0042 |
| 3323 | A | 0.729 | 0.1372 |
| 3324 | C | 0.542 | 0.0806 |
| 3325 | A | 0.718 | 0.1591 |
| 3326 | C | 0.599 | 0.1817 |
| 3327 | C | 0.559 | 0.0629 |
| 3328 | G | 0.856 | 0.0205 |
| 3329 | U | 0.635 | 0.0834 |
| 3330 | U | 0.268 | 0.1089 |
| 3331 | C | 0.432 | 0.0163 |
| 3332 | A | 0.714 | 0.0933 |
| 3333 | C | 0.330 | 0.0269 |
| 3334 | C | 0.397 | 0.1450 |
| 3335 | U | 0.554 | 0.0134 |
| 3336 | U | 0.769 | 0.0622 |
| 3337 | C | 0.734 | 0.0113 |
| 3338 | A | 0.851 | 0.1442 |
| 3339 | A | 1.078 | 0.0000 |
| 3340 | U | 0.661 | 0.0990 |
| 3341 | U | 0.663 | 0.1018 |
| 3342 | G | 0.570 | 0.1223 |
| 3343 | A | 0.651 | 0.0516 |
| 3344 | U | 0.551 | 0.0870 |
| 3345 | G | 0.200 | 0.0587 |
| 3346 | C | 0.408 | 0.1259 |
| 3347 | U | 0.414 | 0.1358 |
| 3348 | U | 0.300 | 0.1096 |
| 3349 | C | 0.400 | 0.0481 |

|      |   |       |        |
|------|---|-------|--------|
| 3350 | U | 0.213 | 0.0332 |
| 3351 | C | 0.124 | 0.0233 |
| 3352 | C | 0.344 | 0.0127 |
| 3353 | A | 0.691 | 0.0700 |
| 3354 | C | 0.307 | 0.1287 |
| 3355 | C | 0.349 | 0.0000 |
| 3356 | G | 0.514 | 0.1541 |
| 3357 | G | 0.332 | 0.2058 |
| 3358 | A | 0.624 | 0.0255 |
| 3359 | A | 0.718 | 0.1223 |
| 3360 | A | 0.910 | 0.0127 |
| 3361 | A | 0.851 | 0.0389 |
| 3362 | U | 1.041 | 0.1025 |
| 3363 | A | 1.005 | 0.1188 |
| 3364 | A | 0.861 | 0.0092 |
| 3365 | U | 0.848 | 0.0163 |
| 3366 | U | 0.211 | 0.0219 |
| 3367 | C | 0.906 | 0.1372 |
| 3368 | A | 0.860 | 0.0134 |
| 3369 | U | 0.690 | 0.1287 |
| 3370 | C | 0.669 | 0.0940 |
| 3371 | G | 0.635 | 0.1315 |
| 3372 | C | 0.632 | 0.1174 |
| 3373 | A | 0.670 | 0.2440 |
| 3374 | C | 0.635 | 0.0870 |
| 3375 | A | 1.050 | 0.1308 |
| 3376 | A | 1.098 | 0.1386 |
| 3377 | U | 0.674 | 0.0410 |
| 3378 | A | 1.157 | 0.0000 |
| 3379 | U | 0.875 | 0.0290 |
| 3380 | U | 0.720 | 0.1054 |
| 3381 | G | 0.424 | 0.0134 |
| 3382 | U | 0.518 | 0.0304 |
| 3383 | U | 0.540 | 0.0255 |
| 3384 | C | 0.445 | 0.0198 |
| 3385 | C | 0.212 | 0.0728 |
| 3386 | U | 0.592 | 0.2376 |
| 3387 | A | 1.342 | 0.0000 |
| 3388 | U | 0.787 | 0.3620 |
| 3389 | C | 1.195 | 0.4306 |
| 3390 | A | 0.922 | 0.1619 |
| 3391 | A | 1.198 | 0.1909 |
| 3392 | A | 1.177 | 0.2461 |
| 3393 | A | 0.852 | 0.0877 |
| 3394 | C | 0.531 | 0.1683 |
| 3395 | G | 0.565 | 0.0099 |
| 3396 | C | 0.160 | 0.0601 |
| 3397 | C | 0.599 | 0.2835 |
| 3398 | A | 1.395 | 0.3818 |
| 3399 | A | 0.439 | 0.2461 |

|      |   |       |        |
|------|---|-------|--------|
| 3400 | C | 0.488 | 0.1230 |
| 3401 | U | 0.476 | 0.1287 |
| 3402 | A | 0.843 | 0.0000 |
| 3403 | C | 0.148 | 0.0530 |
| 3404 | U | 0.457 | 0.0905 |
| 3405 | G | 0.364 | 0.0820 |
| 3406 | U | 0.254 | 0.0919 |
| 3407 | U | 0.365 | 0.0078 |
| 3408 | U | 0.439 | 0.0035 |
| 3409 | C | 0.398 | 0.0955 |
| 3410 | U | 0.589 | 0.1492 |
| 3411 | G | 0.830 | 0.4243 |
| 3412 | A | 0.664 | 0.1732 |
| 3413 | A | 0.806 | 0.2977 |
| 3414 | C | 0.490 | 0.1973 |
| 3415 | A | 1.062 | 0.4646 |
| 3416 | G | 1.034 | 0.3932 |
| 3417 | A | 1.023 | 0.4681 |
| 3418 | A | 0.355 | 0.0191 |
| 3419 | U | 0.636 | 0.3196 |
| 3420 | A | 0.971 | 0.4504 |
| 3421 | C | 0.302 | 0.0962 |
| 3422 | C | 0.533 | 0.3239 |
| 3423 | G | 0.640 | 0.2277 |
| 3424 | A | 0.859 | 0.4582 |
| 3425 | G | 0.631 | 0.1131 |
| 3426 | G | 0.337 | 0.1351 |
| 3427 | A | 0.558 | 0.1704 |
| 3428 | A | 0.669 | 0.2744 |
| 3429 | U | 0.410 | 0.0410 |
| 3430 | C | 0.370 | 0.0856 |
| 3431 | U | 1.072 | 0.3606 |
| 3432 | A | 1.095 | 0.4151 |
| 3433 | U | 0.424 | 0.0658 |
| 3434 | C | 0.538 | 0.0629 |
| 3435 | A | 0.712 | 0.1061 |
| 3436 | U | 0.660 | 0.2022 |
| 3437 | C | 0.514 | 0.2864 |
| 3438 | G | 0.628 | 0.1838 |
| 3439 | C | 0.361 | 0.0707 |
| 3440 | U | 0.461 | 0.1039 |
| 3441 | G | 0.501 | 0.0940 |
| 3442 | A | 0.467 | 0.2220 |
| 3443 | U | 0.116 | 0.0064 |
| 3444 | C | 0.196 | 0.0156 |
| 3445 | U | 0.386 | 0.0438 |
| 3446 | C | 0.212 | 0.0438 |
| 3447 | C | -     | 0.0000 |
| 3448 | C | 0.594 | 0.2616 |
| 3449 | A | 0.371 | 0.0145 |

|      |   |       |        |
|------|---|-------|--------|
| 3450 | C | 0.182 | 0.0057 |
| 3451 | U | 0.376 | 0.0810 |
| 3452 | C | 0.250 | 0.0615 |
| 3453 | C | 0.281 | 0.0506 |
| 3454 | C | 0.389 | 0.0781 |
| 3455 | U | 0.421 | 0.1092 |
| 3456 | G | 0.286 | 0.0346 |
| 3457 | A | 0.567 | 0.0665 |
| 3458 | U | 0.168 | 0.0230 |
| 3459 | C | 0.183 | 0.0000 |
| 3460 | U | 0.536 | 0.0633 |
| 3461 | A | 0.432 | 0.0131 |
| 3462 | C | 0.125 | 0.0583 |
| 3463 | C | 0.226 | 0.0064 |
| 3464 | U | 0.193 | 0.0124 |
| 3465 | C | 0.262 | 0.0156 |
| 3466 | C | 0.193 | 0.0216 |
| 3467 | A | 0.585 | 0.0926 |
| 3468 | G | 0.313 | 0.0407 |
| 3469 | A | 0.433 | 0.0495 |
| 3470 | A | 0.464 | 0.0470 |
| 3471 | U | 0.182 | 0.0170 |
| 3472 | C | 0.191 | 0.1764 |
| 3473 | U | 0.237 | 0.0456 |
| 3474 | C | 0.165 | 0.0725 |
| 3475 | C | 0.108 | 0.0782 |
| 3476 | U | 0.293 | 0.1051 |
| 3477 | A | 0.315 | 0.1214 |
| 3478 | C | 0.237 | 0.0154 |
| 3479 | C | 0.570 | 0.1608 |
| 3480 | G | 0.443 | 0.1490 |
| 3481 | A | 0.333 | 0.0460 |
| 3482 | A | 0.241 | 0.0690 |
| 3483 | U | 0.153 | 0.0396 |
| 3484 | U | 0.169 | 0.0777 |
| 3485 | C | 0.157 | 0.0621 |
| 3486 | C | 0.127 | 0.0900 |
| 3487 | C | 0.140 | 0.0682 |
| 3488 | U | 0.236 | 0.0921 |
| 3489 | G | 0.117 | 0.0100 |
| 3490 | A | 0.323 | 0.0486 |
| 3491 | C | 0.403 | 0.0835 |
| 3492 | C | 0.765 | 0.0601 |
| 3493 | C | -     | 0.0000 |
| 3494 | A | 0.842 | 0.2233 |
| 3495 | U | 0.298 | 0.0759 |
| 3496 | U | 2.404 | 0.3004 |
| 3497 | U | 0.652 | 0.0689 |
| 3498 | A | 0.728 | 0.0577 |
| 3499 | A | 0.848 | 0.1562 |

|      |   |       |        |
|------|---|-------|--------|
| 3500 | A | 0.450 | 0.0408 |
| 3501 | G | 0.651 | 0.1166 |
| 3502 | A | 0.320 | 0.0531 |
| 3503 | A | 0.392 | 0.0323 |
| 3504 | C | 0.228 | 0.0283 |
| 3505 | U | 0.330 | 0.0255 |
| 3506 | C | 0.259 | 0.0619 |
| 3507 | C | 0.219 | 0.0212 |
| 3508 | C | 0.275 | 0.0481 |
| 3509 | A | 0.883 | 0.2785 |
| 3510 | C | -     | 0.0000 |
| 3511 | C | 2.352 | 0.0000 |
| 3512 | G | 0.630 | 0.0375 |
| 3513 | A | 0.741 | 0.0668 |
| 3514 | U | 0.469 | 0.0743 |
| 3515 | A | 0.879 | 0.0691 |
| 3516 | A | 1.080 | 0.0120 |
| 3517 | A | 0.715 | 0.0663 |
| 3518 | U | 0.382 | 0.0033 |
| 3519 | U | 0.390 | 0.0308 |
| 3520 | C | 0.151 | 0.0403 |
| 3521 | U | 0.082 | 0.0378 |
| 3522 | C | 0.966 | 0.4125 |
| 3523 | G | 0.599 | 0.1518 |
| 3524 | U | 0.285 | 0.0918 |
| 3525 | C | 0.059 | 0.0290 |
| 3526 | A | 0.540 | 0.1608 |
| 3527 | A | 0.486 | 0.0110 |
| 3528 | A | 0.342 | 0.0667 |
| 3529 | C | 0.347 | 0.0420 |
| 3530 | U | 0.283 | 0.0292 |
| 3531 | A | 0.354 | 0.1920 |
| 3532 | A | 0.169 | 0.0757 |
| 3533 | U | 0.256 | 0.0856 |
| 3534 | U | 0.204 | 0.1790 |
| 3535 | C | 0.069 | 0.0010 |
| 3536 | C | 0.751 | 0.2871 |
| 3537 | A | 1.082 | 0.4503 |
| 3538 | G | 0.616 | 0.3005 |
| 3539 | U | 0.355 | 0.1485 |
| 3540 | U | 0.201 | 0.1510 |
| 3541 | U | 0.497 | 0.1860 |
| 3542 | G | 0.166 | 0.0439 |
| 3543 | G | 0.367 | 0.1376 |
| 3544 | G | -     | 0.0000 |
| 3545 | U | -     | 0.0000 |
| 3546 | G | -     | 0.0000 |
| 3547 | G | 2.547 | 0.5063 |
| 3548 | U | 0.551 | 0.1514 |
| 3549 | A | 0.268 | 0.0289 |

|      |   |       |        |
|------|---|-------|--------|
| 3550 | U | 0.321 | 0.0543 |
| 3551 | U | 0.256 | 0.0642 |
| 3552 | G | 0.801 | 0.1652 |
| 3553 | G | 0.520 | 0.0771 |
| 3554 | U | 1.515 | 0.8499 |
| 3555 | G | 0.535 | 0.0651 |
| 3556 | A | -     | 0.0000 |
| 3557 | C | -     | 0.0000 |
| 3558 | U | 0.661 | 0.3173 |
| 3559 | C | 0.453 | 0.1641 |
| 3560 | U | 0.194 | 0.0641 |
| 3561 | A | 0.379 | 0.0957 |
| 3562 | A | 0.049 | 0.0100 |
| 3563 | U | 0.429 | 0.6140 |
| 3564 | G | 0.524 | 0.9023 |
| 3565 | C | 0.374 | 0.2390 |
| 3566 | C | 0.425 | 0.1319 |
| 3567 | U | 0.450 | 0.2070 |
| 3568 | A | 0.290 | 0.1794 |
| 3569 | U | 0.689 | 0.2241 |
| 3570 | A | 0.132 | 0.0685 |
| 3571 | C | 0.467 | 0.1236 |
| 3572 | U | 0.605 | 0.2143 |
| 3573 | A | 0.583 | 0.1833 |
| 3574 | C | 0.519 | 0.2022 |
| 3575 | U | 0.372 | 0.1242 |
| 3576 | A | 0.800 | 0.2649 |
| 3577 | U | 0.179 | 0.1605 |
| 3578 | C | 0.713 | 0.2076 |
| 3579 | A | 0.106 | 0.0262 |
| 3580 | A | 0.617 | 0.1410 |
| 3581 | C | 0.622 | 0.1346 |
| 3582 | A | 0.338 | 0.1104 |
| 3583 | G | 0.289 | 0.2326 |
| 3584 | U | 0.345 | 0.2034 |
| 3585 | A | 1.071 | 0.5554 |
| 3586 | A | -     | 0.0000 |
| 3587 | G | 0.544 | 0.1168 |
| 3588 | A | 0.495 | 0.1802 |
| 3589 | A | 0.693 | 0.0250 |
| 3590 | A | 0.830 | 0.2501 |
| 3591 | A | 0.358 | 0.0145 |
| 3592 | G | 0.263 | 0.1250 |
| 3593 | A | 0.508 | 0.5798 |
| 3594 | U | 0.215 | 0.5501 |
| 3595 | C | 0.219 | 0.0397 |
| 3596 | A | 0.493 | 0.1703 |
| 3597 | U | 0.312 | 0.1752 |
| 3598 | U | 0.493 | 0.0991 |
| 3599 | A | 0.567 | 0.2092 |



|      |   |       |        |
|------|---|-------|--------|
| 3600 | G | 0.076 | 0.3797 |
| 3601 | A | 0.436 | 0.4985 |
| 3602 | A | 0.554 | 0.5170 |
| 3603 | G | 0.506 | 0.5182 |
| 3604 | A | 0.551 | 0.2191 |
| 3605 | U | 0.310 | 0.0277 |
| 3606 | A | 0.536 | 0.1732 |
| 3607 | A | 0.698 | 0.1563 |
| 3608 | U | 0.662 | 0.1743 |
| 3609 | G | 0.294 | 0.0459 |
| 3610 | A | 0.348 | 0.0345 |
| 3611 | A | 0.265 | 0.0438 |
| 3612 | A | 0.560 | 0.7799 |
| 3613 | C | -     | 0.0000 |
| 3614 | U | -     | 0.0000 |
| 3615 | G | -     | 0.0000 |
| 3616 | A | -     | 0.0000 |
| 3617 | A | 0.310 | 1.5669 |
| 3618 | A | 0.488 | 0.1371 |
| 3619 | U | 0.204 | 0.0311 |
| 3620 | U | 0.164 | 0.0965 |
| 3621 | A | 0.566 | 0.2343 |
| 3622 | A | 0.641 | 0.6102 |
| 3623 | G | 0.325 | 1.4949 |
| 3624 | G | 0.180 | 0.9695 |
| 3625 | U | 0.143 | 1.2113 |
| 3626 | A | 0.541 | 0.4458 |
| 3627 | U | 0.494 | 0.1574 |
| 3628 | C | 0.592 | 0.1244 |
| 3629 | A | 0.366 | 0.2944 |
| 3630 | C | -     | 0.0000 |
| 3631 | G | 0.013 | 0.1647 |
| 3632 | A | 0.265 | 0.2428 |
| 3633 | G | 0.355 | 0.7499 |
| 3634 | A | -     | 0.0000 |
| 3635 | C | -     | 0.0000 |
| 3636 | A | 0.197 | 0.2532 |
| 3637 | C | 0.220 | 0.0494 |
| 3638 | A | 0.618 | 0.1050 |
| 3639 | U | -     | 0.0000 |
| 3640 | G | 0.685 | 0.1753 |
| 3641 | G | 0.795 | 0.0857 |
| 3642 | A | 0.224 | 0.1030 |
| 3643 | A | 0.796 | 0.0529 |
| 3644 | U | 0.462 | 0.0630 |
| 3645 | A | 0.398 | 0.1315 |
| 3646 | C | 0.186 | 0.1035 |
| 3647 | U | 0.496 | 0.0634 |
| 3648 | A | 0.774 | 0.1617 |
| 3649 | A | 0.751 | 0.1287 |

|      |   |       |        |
|------|---|-------|--------|
| 3650 | G | 0.665 | 0.0448 |
| 3651 | A | 0.466 | 0.3220 |
| 3652 | A | 0.337 | 0.3220 |
| 3653 | U | 0.127 | 0.1168 |
| 3654 | A | 0.196 | 0.1648 |
| 3655 | U | 0.411 | 0.3953 |
| 3656 | G | 0.065 | 0.2333 |
| 3657 | C | 0.221 | 0.1431 |
| 3658 | G | 0.115 | 0.1427 |
| 3659 | U | 0.295 | 0.1520 |
| 3660 | A | 0.456 | 0.1821 |
| 3661 | G | 0.228 | 0.1313 |
| 3662 | U | 0.388 | 0.1862 |
| 3663 | U | 0.348 | 0.0645 |
| 3664 | U | 0.807 | 0.0771 |
| 3665 | A | 0.408 | 0.2191 |
| 3666 | G | 0.139 | 0.1620 |
| 3667 | A | 0.476 | 0.0858 |
| 3668 | A | 0.077 | 0.1593 |
| 3669 | C | 0.509 | 0.3015 |
| 3670 | C | 0.367 | 0.0732 |
| 3671 | U | 0.306 | 0.0902 |
| 3672 | C | 0.347 | 0.1662 |
| 3673 | C | 0.619 | 0.1788 |
| 3674 | G | 0.776 | 0.1134 |
| 3675 | A | -     | 0.0000 |
| 3676 | G | 0.534 | 0.2315 |
| 3677 | A | 0.807 | 0.1407 |
| 3678 | U | 0.171 | 0.0429 |
| 3679 | C | 0.424 | 0.1436 |
| 3680 | G | 0.399 | 0.0739 |
| 3681 | A | 0.177 | 0.0598 |
| 3682 | A | 0.501 | 0.1900 |
| 3683 | G | 0.221 | 0.2761 |
| 3684 | A | 0.234 | 0.2226 |
| 3685 | A | 0.532 | 0.1777 |
| 3686 | A | 0.595 | 0.0933 |
| 3687 | C | 0.365 | 0.2270 |
| 3688 | G | 0.762 | 0.1083 |
| 3689 | A | 0.665 | 0.1475 |
| 3690 | A | 0.799 | 0.1249 |
| 3691 | U | -     | 0.0000 |
| 3692 | U | 0.244 | 0.0574 |
| 3693 | C | 0.603 | 0.0410 |
| 3694 | A | 0.507 | 0.0735 |
| 3695 | C | 0.305 | 0.0446 |
| 3696 | C | 0.301 | 0.0827 |
| 3697 | U | 0.492 | 0.1045 |
| 3698 | G | 0.403 | 0.1139 |
| 3699 | A | 0.253 | 0.0460 |

|      |   |       |        |
|------|---|-------|--------|
| 3700 | U | 0.410 | 0.0972 |
| 3701 | U | 0.742 | 0.2271 |
| 3702 | G | 0.104 | 0.0177 |
| 3703 | C | 0.448 | 0.3058 |
| 3704 | A | 0.610 | 0.1859 |
| 3705 | G | 0.245 | 0.0429 |
| 3706 | C | 0.438 | 0.0737 |
| 3707 | U | 0.618 | 0.0396 |
| 3708 | G | 0.895 | 0.2265 |
| 3709 | U | 0.723 | 0.2430 |
| 3710 | A | 1.338 | 0.2092 |
| 3711 | A | 1.220 | 0.0811 |
| 3712 | A | 1.071 | 0.1132 |
| 3713 | A | 1.020 | 0.1202 |
| 3714 | G | 0.438 | 0.0923 |
| 3715 | C | 0.692 | 0.0926 |
| 3716 | A | 0.947 | 0.1079 |
| 3717 | G | 0.743 | 0.1709 |
| 3718 | U | 0.554 | 0.3021 |
| 3719 | A | 0.965 | 0.3798 |
| 3720 | A | 0.507 | 0.1738 |
| 3721 | A | 0.731 | 0.1663 |
| 3722 | A | 0.634 | 0.0456 |
| 3723 | U | 0.616 | 0.0387 |
| 3724 | C | 0.697 | 0.1208 |
| 3725 | A | 0.861 | 0.1940 |
| 3726 | A | 0.723 | 0.4296 |
| 3727 | U | 0.527 | 0.3095 |
| 3728 | C | 0.620 | 0.1930 |
| 3729 | A | 0.511 | 0.2180 |
| 3730 | A | 0.856 | 0.1319 |
| 3731 | A | 0.865 | 0.1426 |
| 3732 | C | 0.500 | 0.0751 |
| 3733 | C | 1.019 | 0.1536 |
| 3734 | A | 1.045 | 0.1643 |
| 3735 | A | 1.019 | 0.1949 |
| 3736 | U | 0.798 | 0.1100 |
| 3737 | A | 1.067 | 0.1046 |
| 3738 | C | 0.716 | 0.2105 |
| 3739 | G | 0.876 | 0.1617 |
| 3740 | G | 0.976 | 0.1609 |
| 3741 | A | 0.577 | 0.1199 |
| 3742 | C | 0.327 | 0.0802 |
| 3743 | A | 0.300 | 0.1248 |
| 3744 | A | 0.247 | 0.0842 |
| 3745 | C | 0.420 | 0.0715 |
| 3746 | C | 0.740 | 0.0159 |
| 3747 | U | 0.233 | 0.1137 |
| 3748 | U | 0.853 | 0.1560 |
| 3749 | A | 1.170 | 0.2629 |

|      |   |       |        |
|------|---|-------|--------|
| 3750 | C | 1.140 | 0.2972 |
| 3751 | G | 0.275 | 0.0921 |
| 3752 | A | 0.306 | 0.1008 |
| 3753 | U | 0.345 | 0.0788 |
| 3754 | A | 0.252 | 0.0638 |
| 3755 | C | 0.123 | 0.0952 |
| 3756 | G | 0.241 | 0.1922 |
| 3757 | A | 0.128 | 0.1078 |
| 3758 | U | 0.204 | 0.0486 |
| 3759 | G | 0.070 | 0.1959 |
| 3760 | A | -     | 0.0000 |
| 3761 | G | -     | 0.0000 |
| 3762 | G | 0.345 | 0.1397 |
| 3763 | C | 0.349 | 0.0634 |
| 3764 | A | 0.560 | 0.2258 |
| 3765 | A | 0.508 | 0.1182 |
| 3766 | U | 0.041 | 0.0414 |
| 3767 | C | 0.400 | 0.1523 |
| 3768 | A | 0.441 | 0.0945 |
| 3769 | C | 0.099 | 0.0373 |
| 3770 | C | 0.243 | 0.1068 |
| 3771 | U | 0.284 | 0.1495 |
| 3772 | A | 0.430 | 0.1836 |
| 3773 | U | 0.365 | 0.1097 |
| 3774 | A | 0.605 | 0.2127 |
| 3775 | A | 0.552 | 0.2288 |
| 3776 | U | 0.101 | 0.1178 |
| 3777 | A | 0.348 | 0.1767 |
| 3778 | A | 0.925 | 0.2441 |
| 3779 | A | 0.505 | 0.1262 |
| 3780 | G | 0.217 | 0.1916 |
| 3781 | A | 0.303 | 0.0988 |
| 3782 | U | 0.134 | 0.0604 |
| 3783 | A | 0.461 | 0.0642 |
| 3784 | U | 0.372 | 0.2519 |
| 3785 | U | 0.333 | 0.0826 |
| 3786 | A | 0.479 | 0.1029 |
| 3787 | A | 0.691 | 0.2064 |
| 3788 | A | 0.551 | 0.1941 |
| 3789 | G | 0.511 | 0.1966 |
| 3790 | A | 0.258 | 0.0948 |
| 3791 | A | 0.441 | 0.0894 |
| 3792 | A | 0.436 | 0.0436 |
| 3793 | A | 0.528 | 0.0225 |
| 3794 | A | 0.609 | 0.4263 |
| 3795 | G | 0.356 | 0.0934 |
| 3796 | A | 0.262 | 0.1055 |
| 3797 | A | 0.445 | 0.0983 |
| 3798 | A | 0.580 | 0.1253 |
| 3799 | A | 0.519 | 0.1194 |

|      |   |       |        |
|------|---|-------|--------|
| 3800 | A | 0.262 | 0.0860 |
| 3801 | U | 0.280 | 0.1216 |
| 3802 | A | 0.209 | 0.0413 |
| 3803 | U | 0.364 | 0.0919 |
| 3804 | A | 0.509 | 0.1217 |
| 3805 | U | 0.193 | 0.1033 |
| 3806 | C | 0.326 | 0.0642 |
| 3807 | G | 0.393 | 0.1039 |
| 3808 | A | 0.467 | 0.1425 |
| 3809 | G | 0.354 | 0.0944 |
| 3810 | G | 0.280 | 0.3530 |
| 3811 | C | 0.232 | 0.3403 |
| 3812 | A | 0.135 | 0.3312 |
| 3813 | U | 0.226 | 0.0891 |
| 3814 | A | 0.190 | 0.0453 |
| 3815 | C | 0.135 | 0.0387 |
| 3816 | C | 0.230 | 0.0816 |
| 3817 | A | 0.350 | 0.0557 |
| 3818 | C | 0.095 | 0.0618 |
| 3819 | A | 0.346 | 0.0782 |
| 3820 | A | 0.434 | 0.1434 |
| 3821 | A | 0.290 | 0.0717 |
| 3822 | G | 0.234 | 0.5292 |
| 3823 | A | 0.254 | 0.0461 |
| 3824 | A | 0.458 | 0.1086 |
| 3825 | G | 0.248 | 0.0737 |
| 3826 | U | 0.099 | 0.0712 |
| 3827 | C | 0.285 | 0.1269 |
| 3828 | A | 0.494 | 0.2444 |
| 3829 | A | 0.467 | 0.2197 |
| 3830 | U | 0.096 | 1.0534 |
| 3831 | C | 0.405 | 0.0671 |
| 3832 | A | 0.256 | 0.0461 |
| 3833 | A | 0.403 | 0.1705 |
| 3834 | C | 0.199 | 0.0697 |
| 3835 | U | 0.367 | 0.1377 |
| 3836 | G | 0.389 | 0.0539 |
| 3837 | U | 0.189 | 0.1380 |
| 3838 | U | 0.295 | 0.0754 |
| 3839 | G | 0.274 | 0.1870 |
| 3840 | A | 0.254 | 0.0666 |
| 3841 | A | 0.285 | 0.1263 |
| 3842 | G | 0.285 | 0.0384 |
| 3843 | A | 0.431 | 0.3835 |
| 3844 | U | 0.407 | 0.1787 |
| 3845 | G | 0.506 | 0.2529 |
| 3846 | A | 0.496 | 0.0923 |
| 3847 | A | 0.830 | 0.0372 |
| 3848 | A | 1.327 | 0.2136 |
| 3849 | A | -     | 0.0000 |

|      |   |       |        |
|------|---|-------|--------|
| 3850 | C | 0.230 | 0.2086 |
| 3851 | U | 0.224 | 0.0535 |
| 3852 | U | 0.551 | 0.0776 |
| 3853 | G | 0.331 | 0.0504 |
| 3854 | G | 0.417 | 0.0106 |
| 3855 | G | 0.312 | 0.0567 |
| 3856 | A | 0.330 | 0.0820 |
| 3857 | C | 0.273 | 0.0510 |
| 3858 | A | 0.496 | 0.0468 |
| 3859 | C | 0.174 | 0.0191 |
| 3860 | U | 0.245 | 0.0638 |
| 3861 | G | 0.375 | 0.0408 |
| 3862 | A | 0.504 | 0.0707 |
| 3863 | C | 0.760 | 0.0773 |
| 3864 | G | 0.790 | 0.0309 |
| 3865 | A | 0.752 | 0.0476 |
| 3866 | A | 0.739 | 0.0938 |
| 3867 | U | 0.576 | 0.1713 |
| 3868 | A | 1.074 | 0.1178 |
| 3869 | U | 0.163 | 0.0930 |
| 3870 | U | 0.508 | 0.2323 |
| 3871 | A | 0.656 | 0.1199 |
| 3872 | U | 0.310 | 0.0156 |
| 3873 | G | 0.159 | 0.0937 |
| 3874 | A | 0.616 | 0.1774 |
| 3875 | C | 0.277 | 0.1755 |
| 3876 | A | -     | 0.0000 |
| 3877 | G | -     | 0.0000 |
| 3878 | A | 0.453 | 0.0665 |
| 3879 | A | 0.855 | 0.1755 |
| 3880 | A | 0.700 | 0.1417 |
| 3881 | A | 0.883 | 0.2474 |
| 3882 | G | 0.811 | 0.2883 |
| 3883 | A | 1.038 | 0.1964 |
| 3884 | A | 0.923 | 0.2119 |
| 3885 | A | 0.588 | 0.1060 |
| 3886 | U | 0.726 | 0.1077 |
| 3887 | A | 0.130 | 0.0576 |
| 3888 | G | 0.177 | 0.0391 |
| 3889 | A | 0.681 | 0.1623 |
| 3890 | C | 0.413 | 0.1751 |
| 3891 | C | 0.363 | 0.0366 |
| 3892 | C | 0.329 | 0.0672 |
| 3893 | U | 0.638 | 0.1011 |
| 3894 | A | 0.774 | 0.1272 |
| 3895 | A | 0.773 | 0.0599 |
| 3896 | A | 0.490 | 0.1724 |
| 3897 | A | 0.941 | 0.1583 |
| 3898 | G | 0.540 | 0.0793 |
| 3899 | A | 0.337 | 0.1959 |

|      |   |       |        |
|------|---|-------|--------|
| 3900 | G | 0.319 | 0.1334 |
| 3901 | U | 0.143 | 0.0530 |
| 3902 | A | 0.652 | 0.2024 |
| 3903 | A | 1.202 | 0.2311 |
| 3904 | U | 0.310 | 0.1319 |
| 3905 | A | 0.876 | 0.2345 |
| 3906 | A | 0.742 | 0.0468 |
| 3907 | A | 0.483 | 0.1548 |
| 3908 | C | 0.457 | 0.1311 |
| 3909 | U | 0.364 | 0.0390 |
| 3910 | C | 0.320 | 0.0667 |
| 3911 | A | 0.496 | 0.0895 |
| 3912 | A | 0.677 | 0.1365 |
| 3913 | U | 0.944 | 0.0763 |
| 3914 | G | 0.559 | 0.0497 |
| 3915 | U | 0.406 | 0.1013 |
| 3916 | U | 0.038 | 0.0379 |
| 3917 | U | 0.210 | 0.0569 |
| 3918 | A | 0.419 | 0.0961 |
| 3919 | U | 0.150 | 0.0635 |
| 3920 | C | 0.338 | 0.1340 |
| 3921 | U | 0.269 | 0.1717 |
| 3922 | U | -     | 0.0000 |
| 3923 | C | 0.316 | 0.1761 |
| 3924 | A | 0.770 | 0.3005 |
| 3925 | A | 0.147 | 0.0643 |
| 3926 | C | 0.400 | 0.0697 |
| 3927 | A | 0.531 | 0.1168 |
| 3928 | A | 0.925 | 0.2106 |
| 3929 | G | 0.404 | 0.1383 |
| 3930 | A | 0.244 | 0.1369 |
| 3931 | A | 0.698 | 0.1533 |
| 3932 | A | 0.301 | 0.0649 |
| 3933 | C | 2.935 | 0.2788 |
| 3934 | G | 0.277 | 0.0485 |
| 3935 | U | 0.334 | 0.1162 |
| 3936 | G | 0.302 | 0.1891 |
| 3937 | A | 0.559 | 0.2233 |
| 3938 | C | 1.707 | 0.1520 |
| 3939 | G | 0.124 | 0.0134 |
| 3940 | G | 0.823 | 0.2682 |
| 3941 | U | 0.556 | 0.3492 |
| 3942 | A | 0.413 | 0.1549 |
| 3943 | C | 0.557 | 0.2558 |
| 3944 | U | 0.625 | 0.0757 |
| 3945 | C | 0.553 | 0.2290 |
| 3946 | A | 0.844 | 0.2550 |
| 3947 | U | 0.597 | 0.2171 |
| 3948 | A | -     | 0.0000 |
| 3949 | A | 1.210 | 0.0057 |

|      |   |       |        |
|------|---|-------|--------|
| 3950 | A | 0.973 | 0.1134 |
| 3951 | G | 0.619 | 0.1486 |
| 3952 | C | 0.596 | 0.1446 |
| 3953 | U | 0.854 | 0.1353 |
| 3954 | A | 0.882 | 0.0540 |
| 3955 | G | 0.616 | 0.0727 |
| 3956 | A | 0.384 | 0.0245 |
| 3957 | U | 0.395 | 0.1404 |
| 3958 | U | 0.184 | 0.0211 |
| 3959 | U | 0.444 | 0.0564 |
| 3960 | G | 0.523 | 0.0580 |
| 3961 | U | 0.271 | 0.0755 |
| 3962 | U | 0.462 | 0.0367 |
| 3963 | G | 0.598 | 0.1655 |
| 3964 | C | 0.504 | 0.1359 |
| 3965 | A | 0.501 | 0.0690 |
| 3966 | A | 0.827 | 0.0356 |
| 3967 | G | 1.267 | 0.3012 |
| 3968 | A | 2.269 | 0.5710 |
| 3969 | G | 4.065 | 3.2937 |
| 3970 | G | 2.968 | 2.8973 |
| 3971 | U | 1.823 | 1.1288 |
| 3972 | G | 0.572 | 0.0014 |
| 3973 | A | -     | 0.0000 |
| 3974 | U | 0.382 | 0.1741 |
| 3975 | A | 0.932 | 0.2198 |
| 3976 | U | 0.574 | 0.1712 |
| 3977 | U | 0.745 | 0.1584 |
| 3978 | C | 0.463 | 0.1199 |
| 3979 | A | 1.156 | 0.1228 |
| 3980 | G | 0.145 | 0.0536 |
| 3981 | C | 0.437 | 0.0421 |
| 3982 | A | 0.974 | 0.0909 |
| 3983 | U | 0.398 | 0.0643 |
| 3984 | C | 0.382 | 0.0360 |
| 3985 | C | 0.349 | 0.2259 |
| 3986 | U | 1.013 | 0.0837 |
| 3987 | G | 0.697 | 0.1695 |
| 3988 | A | 0.616 | 0.0956 |
| 3989 | C | 0.370 | 0.1015 |
| 3990 | A | 1.038 | 0.1145 |
| 3991 | C | 0.365 | 0.0556 |
| 3992 | U | 0.546 | 0.0815 |
| 3993 | U | 2.137 | 0.5962 |
| 3994 | A | 0.547 | 0.1046 |
| 3995 | C | 0.694 | 0.1029 |
| 3996 | G | 0.595 | 0.0857 |
| 3997 | A | 0.739 | 0.1421 |
| 3998 | C | 0.545 | 0.1119 |
| 3999 | U | 0.453 | 0.0842 |



|      |   |       |        |
|------|---|-------|--------|
| 4000 | C | 0.332 | 0.0716 |
| 4001 | A | 0.842 | 0.0396 |
| 4002 | G | 0.793 | 0.0821 |
| 4003 | G | 0.535 | 0.1681 |
| 4004 | C | 0.405 | 0.0384 |
| 4005 | A | 0.725 | 0.0680 |
| 4006 | U | 0.726 | 0.0934 |
| 4007 | G | 0.340 | 0.0897 |
| 4008 | C | 0.381 | 0.1478 |
| 4009 | A | -     | 0.0000 |
| 4010 | A | 0.468 | 0.1428 |
| 4011 | U | 0.664 | 0.0346 |
| 4012 | C | 0.833 | 0.3436 |
| 4013 | C | 0.762 | 0.2116 |
| 4014 | A | 0.812 | 0.1255 |
| 4015 | A | 0.592 | 0.1178 |
| 4016 | U | 0.387 | 0.0731 |
| 4017 | A | 0.736 | 0.0225 |
| 4018 | C | 0.599 | 0.1595 |
| 4019 | C | 0.473 | 0.0841 |
| 4020 | G | 0.641 | 0.1357 |
| 4021 | U | 0.749 | 0.1350 |
| 4022 | A | 0.517 | 0.2115 |
| 4023 | C | 0.678 | 0.0644 |
| 4024 | A | 0.298 | 0.0281 |
| 4025 | U | 0.596 | 0.1672 |
| 4026 | C | 0.596 | 0.0382 |
| 4027 | A | 0.519 | 0.1723 |
| 4028 | C | 0.540 | 0.0439 |
| 4029 | U | 0.409 | 0.0770 |
| 4030 | A | 0.779 | 0.0180 |
| 4031 | U | 0.652 | 0.0503 |
| 4032 | G | 0.790 | 0.1805 |
| 4033 | C | 0.498 | 0.0879 |
| 4034 | A | 1.059 | 0.2148 |
| 4035 | U | 0.721 | 0.1027 |
| 4036 | U | 0.540 | 0.0451 |
| 4037 | A | 1.191 | 0.1268 |
| 4038 | A | 0.695 | 0.1209 |
| 4039 | U | 0.901 | 0.1097 |
| 4040 | G | 0.758 | 0.0891 |
| 4041 | A | 0.271 | 0.1021 |
| 4042 | C | 0.584 | 0.0116 |
| 4043 | A | 0.518 | 0.0676 |
| 4044 | U | 0.269 | 0.0925 |
| 4045 | C | 0.475 | 0.0720 |
| 4046 | C | 0.644 | 0.1246 |
| 4047 | C | 0.335 | 0.0304 |
| 4048 | U | 0.901 | 0.0540 |
| 4049 | G | 0.576 | 0.0458 |

|      |   |       |        |
|------|---|-------|--------|
| 4050 | U | 0.558 | 0.0456 |
| 4051 | C | 0.333 | 0.0453 |
| 4052 | A | 0.570 | 0.1039 |
| 4053 | C | 0.464 | 0.1040 |
| 4054 | U | 0.460 | 0.0362 |
| 4055 | U | 0.371 | 0.0162 |
| 4056 | G | 0.519 | 0.0981 |
| 4057 | C | 0.678 | 0.0265 |
| 4058 | A | 0.461 | 0.0879 |
| 4059 | U | 0.691 | 0.1217 |
| 4060 | U | 0.574 | 0.0318 |
| 4061 | A | 0.863 | 0.0855 |
| 4062 | G | 0.625 | 0.0497 |
| 4063 | A | 0.827 | 0.1486 |
| 4064 | C | 0.552 | 0.0570 |
| 4065 | A | 0.968 | 0.1198 |
| 4066 | A | 0.708 | 0.1409 |
| 4067 | U | 0.791 | 0.1970 |
| 4068 | A | 1.388 | 0.1837 |
| 4069 | A | 0.959 | 0.3199 |
| 4070 | C | 0.466 | 0.0930 |
| 4071 | U | 0.693 | 0.1615 |
| 4072 | A | 0.997 | 0.2573 |
| 4073 | C | 0.497 | 0.1502 |
| 4074 | U | 0.606 | 0.1342 |
| 4075 | A | 0.889 | 0.2601 |
| 4076 | U | 0.710 | 0.1603 |
| 4077 | A | 0.733 | 0.2428 |
| 4078 | U | 0.641 | 0.1814 |
| 4079 | U | 0.552 | 0.1152 |
| 4080 | A | 0.865 | 0.2082 |
| 4081 | C | 0.435 | 0.1151 |
| 4082 | A | 0.557 | 0.0946 |
| 4083 | C | 0.518 | 0.2273 |
| 4084 | A | 0.655 | 0.1008 |
| 4085 | A | 0.520 | 0.1158 |
| 4086 | U | 0.508 | 0.1405 |
| 4087 | U | 0.631 | 0.0631 |
| 4088 | A | 0.657 | 0.0231 |
| 4089 | G | 0.568 | 0.0643 |
| 4090 | A | 0.419 | 0.0697 |
| 4091 | C | 0.399 | 0.0454 |
| 4092 | A | 0.296 | 0.0765 |
| 4093 | U | 0.396 | 0.0950 |
| 4094 | A | 0.387 | 0.0939 |
| 4095 | U | 0.218 | 0.0404 |
| 4096 | C | 0.226 | 0.1448 |
| 4097 | U | 0.280 | 0.0852 |
| 4098 | U | 0.168 | 0.0626 |
| 4099 | C | 0.334 | 0.0815 |

|      |   |       |        |
|------|---|-------|--------|
| 4100 | G | 0.439 | 0.1214 |
| 4101 | G | 0.147 | 0.0081 |
| 4102 | C | 0.241 | 0.0835 |
| 4103 | A | 0.434 | 0.0792 |
| 4104 | U | 0.363 | 1.2258 |
| 4105 | A | 0.339 | 0.0230 |
| 4106 | U | 0.518 | 0.0841 |
| 4107 | U | 0.471 | 0.0750 |
| 4108 | U | 0.270 | 0.0166 |
| 4109 | G | 0.285 | 0.0758 |
| 4110 | U | 0.281 | 0.1123 |
| 4111 | A | 0.252 | 0.1414 |
| 4112 | U | 0.410 | 0.3363 |
| 4113 | G | 0.190 | 0.0472 |
| 4114 | C | 0.265 | 0.1248 |
| 4115 | A | 0.222 | 0.0644 |
| 4116 | G | 0.451 | 0.0782 |
| 4117 | A | 0.403 | 0.0593 |
| 4118 | C | 0.205 | 0.0521 |
| 4119 | A | 0.398 | 0.1311 |
| 4120 | U | 0.142 | 0.0468 |
| 4121 | C | 0.110 | 0.0616 |
| 4122 | A | 0.245 | 0.1195 |
| 4123 | A | 0.348 | 0.0735 |
| 4124 | A | 0.442 | 0.1503 |
| 4125 | G | 0.230 | 0.0547 |
| 4126 | A | 0.211 | 0.0209 |
| 4127 | A | 0.368 | 0.0590 |
| 4128 | G | 0.097 | 0.1110 |
| 4129 | A | 0.186 | 0.0722 |
| 4130 | A | 0.252 | 0.0519 |
| 4131 | U | 0.153 | 0.1148 |
| 4132 | U | 0.184 | 0.1044 |
| 4133 | A | 0.293 | 0.2603 |
| 4134 | U | 0.171 | 0.0651 |
| 4135 | A | 0.301 | 0.0028 |
| 4136 | C | 0.212 | 0.0643 |
| 4137 | A | 0.282 | 0.1409 |
| 4138 | U | 0.584 | 0.0494 |
| 4139 | A | 0.429 | 0.0545 |
| 4140 | A | 0.275 | 0.1229 |
| 4141 | G | 0.288 | 0.0959 |
| 4142 | A | 0.279 | 0.1128 |
| 4143 | C | 0.174 | 0.2931 |
| 4144 | C | 0.243 | 0.0810 |
| 4145 | U | 0.234 | 0.1234 |
| 4146 | C | 0.200 | 0.1001 |
| 4147 | C | 0.276 | 0.0817 |
| 4148 | A | 0.223 | 0.0198 |
| 4149 | C | 0.220 | 0.0021 |

|      |   |       |        |
|------|---|-------|--------|
| 4150 | C | 0.177 | 1.0200 |
| 4151 | A | 0.335 | 0.0863 |
| 4152 | C | 0.492 | 0.0909 |
| 4153 | A | 0.487 | 0.0813 |
| 4154 | U | 0.198 | 0.0902 |
| 4155 | U | 0.222 | 0.0131 |
| 4156 | U | 0.304 | 0.0438 |
| 4157 | A | 0.458 | 0.0672 |
| 4158 | G | 0.337 | 0.0477 |
| 4159 | G | 0.179 | 0.0088 |
| 4160 | A | 0.304 | 0.0431 |
| 4161 | A | 0.409 | 0.0841 |
| 4162 | U | 0.316 | 0.1068 |
| 4163 | G | 0.273 | 0.0598 |
| 4164 | A | 0.276 | 0.1001 |
| 4165 | A | 0.411 | 0.1163 |
| 4166 | U | 0.450 | 0.1160 |
| 4167 | G | 0.299 | 0.0647 |
| 4168 | A | 0.187 | 0.0000 |
| 4169 | U | 0.335 | 0.0854 |
| 4170 | A | 0.532 | 0.0385 |
| 4171 | A | 0.304 | 0.0669 |
| 4172 | G | 0.365 | 0.0053 |
| 4173 | U | 0.276 | 0.0640 |
| 4174 | U | 0.354 | 0.0150 |
| 4175 | G | 0.277 | 0.0660 |
| 4176 | A | 0.143 | 0.0014 |
| 4177 | U | 0.247 | 0.0502 |
| 4178 | A | 0.355 | 0.0468 |
| 4179 | C | 0.117 | 0.0483 |
| 4180 | G | 0.113 | 0.0368 |
| 4181 | U | 0.253 | 0.0402 |
| 4182 | U | 0.230 | 0.0241 |
| 4183 | U | 0.210 | 0.0126 |
| 4184 | G | 0.364 | 0.0420 |
| 4185 | A | 0.523 | 0.0668 |
| 4186 | A | 0.802 | 0.0846 |
| 4187 | G | 0.603 | 0.2038 |
| 4188 | A | 0.266 | 0.1071 |
| 4189 | A | 0.706 | 0.3596 |
| 4190 | A | 0.286 | 0.1843 |
| 4191 | U | 0.531 | 0.1223 |
| 4192 | C | 0.272 | 0.1374 |
| 4193 | A | 0.439 | 0.0627 |
| 4194 | C | 0.285 | 0.0196 |
| 4195 | U | 0.427 | 0.1423 |
| 4196 | U | 0.261 | 0.1046 |
| 4197 | U | 0.221 | 0.1254 |
| 4198 | A | 0.721 | 0.1361 |
| 4199 | U | 0.487 | 0.1886 |

|      |   |       |        |
|------|---|-------|--------|
| 4200 | G | 0.162 | 0.1282 |
| 4201 | G | 0.544 | 0.2847 |
| 4202 | A | -     | 0.0000 |
| 4203 | U | 0.504 | 0.0721 |
| 4204 | U | 0.597 | 0.1059 |
| 4205 | G | 0.330 | 0.1301 |
| 4206 | A | 1.048 | 0.1259 |
| 4207 | A | 0.924 | 0.2065 |
| 4208 | A | 0.476 | 0.1467 |
| 4209 | C | 0.188 | 0.0578 |
| 4210 | A | 0.478 | 0.1389 |
| 4211 | A | 0.503 | 0.0911 |
| 4212 | A | 0.429 | 0.0635 |
| 4213 | G | 0.047 | 0.0608 |
| 4214 | U | 0.211 | 0.0505 |
| 4215 | G | 0.215 | 0.0728 |
| 4216 | G | 0.196 | 0.0570 |
| 4217 | A | 0.517 | 0.2305 |
| 4218 | G | 0.555 | 0.2399 |
| 4219 | C | 0.340 | 0.1067 |
| 4220 | G | 0.483 | 0.1354 |
| 4221 | A | 0.590 | 0.0917 |
| 4222 | A | 0.284 | 0.0365 |
| 4223 | C | 0.153 | 0.0554 |
| 4224 | U | 0.879 | 0.1042 |
| 4225 | G | 0.349 | 0.0750 |
| 4226 | G | 0.157 | 0.0726 |
| 4227 | U | 0.260 | 0.1351 |
| 4228 | A | 0.348 | 0.1158 |
| 4229 | C | 0.347 | 0.1967 |
| 4230 | G | 0.150 | 0.0346 |
| 4231 | A | 0.639 | 0.0304 |
| 4232 | A | -     | 0.0000 |
| 4233 | A | 0.947 | 0.5589 |
| 4234 | C | 0.391 | 0.5631 |
| 4235 | U | 0.518 | 0.1229 |
| 4236 | A | 0.707 | 0.0104 |
| 4237 | U | 0.337 | 0.1051 |
| 4238 | C | 0.459 | 0.0634 |
| 4239 | A | 0.339 | 0.1428 |
| 4240 | A | 0.730 | 0.0886 |
| 4241 | A | 0.598 | 0.0807 |
| 4242 | U | 0.367 | 0.0930 |
| 4243 | C | 0.341 | 0.1038 |
| 4244 | A | 0.155 | 0.1099 |
| 4245 | U | 0.394 | 0.1285 |
| 4246 | A | 0.421 | 0.1780 |
| 4247 | C | 0.217 | 0.0495 |
| 4248 | C | 0.168 | 0.1013 |
| 4249 | U | 0.363 | 0.1548 |

|      |   |       |        |
|------|---|-------|--------|
| 4250 | G | 0.530 | 0.1419 |
| 4251 | A | 0.678 | 0.1500 |
| 4252 | U | 0.585 | 0.1721 |
| 4253 | A | 0.876 | 0.1933 |
| 4254 | C | 0.448 | 0.0885 |
| 4255 | A | 1.340 | 0.3008 |
| 4256 | A | 0.984 | 4.9179 |
| 4257 | C | 0.723 | 1.6263 |
| 4258 | A | 0.705 | 1.3468 |
| 4259 | A | 0.945 | 0.6389 |
| 4260 | U | 0.664 | 0.4539 |
| 4261 | G | 0.446 | 0.1373 |
| 4262 | U | 0.389 | 0.0159 |
| 4263 | G | 0.307 | 0.0499 |
| 4264 | G | 0.097 | 0.0546 |
| 4265 | U | 0.188 | 0.0552 |
| 4266 | A | 0.607 | 0.0524 |
| 4267 | U | 0.363 | 0.1429 |
| 4268 | G | 0.243 | 0.0548 |
| 4269 | G | 0.378 | 0.0225 |
| 4270 | A | 0.791 | 0.0569 |
| 4271 | A | 0.518 | 0.1504 |
| 4272 | G | 0.382 | 0.0911 |
| 4273 | A | 1.041 | 0.2284 |
| 4274 | A | 0.797 | 0.1769 |
| 4275 | G | 0.289 | 0.0929 |
| 4276 | U | 0.765 | 0.1099 |
| 4277 | U | 0.893 | 0.1678 |
| 4278 | C | 0.273 | 0.0350 |
| 4279 | G | 0.517 | 0.0802 |
| 4280 | U | 0.585 | 0.0659 |
| 4281 | G | 0.309 | 0.0437 |
| 4282 | G | 0.219 | 0.0569 |
| 4283 | A | 1.039 | 0.1060 |
| 4284 | U | 0.696 | 0.0570 |
| 4285 | G | 0.913 | 0.0201 |
| 4286 | G | 0.749 | 0.1341 |
| 4287 | U | 0.278 | 0.1060 |
| 4288 | C | 0.242 | 0.0896 |
| 4289 | A | 0.332 | 0.1448 |
| 4290 | U | 1.032 | 0.2699 |
| 4291 | G | 0.273 | 0.1726 |
| 4292 | C | 0.434 | 0.2186 |
| 4293 | G | 0.236 | 0.1094 |
| 4294 | U | 0.649 | 0.3262 |
| 4295 | A | 0.930 | 0.2803 |
| 4296 | U | 0.705 | 0.1499 |
| 4297 | U | 1.014 | 0.0337 |
| 4298 | U | 0.830 | 0.2262 |
| 4299 | A | 1.349 | 0.2057 |

|      |   |       |        |
|------|---|-------|--------|
| 4300 | A | 1.069 | 0.3200 |
| 4301 | A | 1.180 | 0.2674 |
| 4302 | A | 1.002 | 0.3419 |
| 4303 | A | 0.895 | 0.3475 |
| 4304 | C | 0.415 | 0.1556 |
| 4305 | A | 0.975 | 0.1203 |
| 4306 | G | 0.564 | 0.1171 |
| 4307 | U | 0.210 | 0.1170 |
| 4308 | C | 0.364 | 0.1094 |
| 4309 | A | 0.424 | 0.2139 |
| 4310 | A | 1.161 | 0.2604 |
| 4311 | G | 0.571 | 0.1914 |
| 4312 | U | 1.685 | 0.6069 |
| 4313 | G | 0.899 | 0.3709 |
| 4314 | A | 1.237 | 0.6507 |
| 4315 | C | 3.422 | 2.4095 |
| 4316 | A | 0.698 | 0.0956 |
| 4317 | A | 0.498 | 0.1727 |
| 4318 | U | 0.674 | 0.3283 |
| 4319 | U | 0.519 | 0.1779 |
| 4320 | U | 0.702 | 0.1140 |
| 4321 | G | 0.533 | 0.1099 |
| 4322 | U | 0.393 | 0.0843 |
| 4323 | U | 0.476 | 0.1194 |
| 4324 | U | 0.559 | 0.0490 |
| 4325 | A | 0.667 | 0.1793 |
| 4326 | U | 0.751 | 0.1025 |
| 4327 | U | 0.552 | 0.1336 |
| 4328 | C | 0.568 | 0.1097 |
| 4329 | G | 0.564 | 0.1709 |
| 4330 | U | 0.454 | 0.0831 |
| 4331 | A | 0.845 | 0.1556 |
| 4332 | G | 0.506 | 0.0101 |
| 4333 | A | 0.327 | 0.1476 |
| 4334 | U | 0.685 | 0.2032 |
| 4335 | G | 0.661 | 0.1465 |
| 4336 | A | 0.522 | 0.3722 |
| 4337 | U | 0.313 | 0.1768 |
| 4338 | A | 0.686 | 0.1520 |
| 4339 | U | 0.830 | 0.2109 |
| 4340 | G | 0.560 | 0.1110 |
| 4341 | G | 0.413 | 0.0903 |
| 4342 | U | 0.181 | 0.0596 |
| 4343 | A | 0.525 | 0.0624 |
| 4344 | U | 0.422 | 0.1280 |
| 4345 | U | 0.524 | 0.1764 |
| 4346 | G | 0.360 | 0.1019 |
| 4347 | U | 0.447 | 0.1569 |
| 4348 | U | 0.408 | 0.1826 |
| 4349 | U | 0.385 | 0.1475 |

|      |   |       |        |
|------|---|-------|--------|
| 4350 | A | 0.772 | 0.1325 |
| 4351 | G | 0.404 | 0.0571 |
| 4352 | C | 0.509 | 0.1855 |
| 4353 | A | 0.966 | 0.1146 |
| 4354 | A | 1.382 | 0.2664 |
| 4355 | A | 0.582 | 0.1322 |
| 4356 | A | 0.857 | 0.0330 |
| 4357 | A | 0.874 | 0.0801 |
| 4358 | U | 0.549 | 0.0992 |
| 4359 | C | 0.439 | 0.0060 |
| 4360 | U | 0.552 | 0.1278 |
| 4361 | A | 0.982 | 0.0775 |
| 4362 | A | 0.375 | 0.0796 |
| 4363 | A | 0.645 | 0.0804 |
| 4364 | U | 0.447 | 0.1498 |
| 4365 | U | 0.264 | 0.1544 |
| 4366 | C | 0.394 | 0.0620 |
| 4367 | A | 0.672 | 0.0468 |
| 4368 | A | -     | 0.0000 |
| 4369 | A | 1.705 | 0.1021 |
| 4370 | C | 0.589 | 0.0716 |
| 4371 | A | 1.097 | 0.0883 |
| 4372 | A | 1.029 | 0.0353 |
| 4373 | A | 0.873 | 0.0414 |
| 4374 | A | 0.886 | 0.0357 |
| 4375 | G | 0.288 | 0.0482 |
| 4376 | A | 0.335 | 0.0516 |
| 4377 | A | 0.743 | 0.0438 |
| 4378 | U | 0.324 | 0.0332 |
| 4379 | U | 0.349 | 0.0815 |
| 4380 | A | 0.954 | 0.1696 |
| 4381 | U | 0.361 | 0.0790 |
| 4382 | A | 0.794 | 0.0889 |
| 4383 | G | 0.469 | 0.0791 |
| 4384 | A | 0.480 | 0.1165 |
| 4385 | G | 0.182 | 0.0284 |
| 4386 | A | 0.448 | 0.0520 |
| 4387 | A | 0.665 | 0.0735 |
| 4388 | G | 0.228 | 0.0140 |
| 4389 | C | 0.237 | 0.1311 |
| 4390 | U | 0.342 | 0.0822 |
| 4391 | U | 0.664 | 0.1198 |
| 4392 | A | 0.815 | 0.1306 |
| 4393 | A | 0.777 | 0.1460 |
| 4394 | G | 0.519 | 0.2494 |
| 4395 | A | 0.561 | 0.1370 |
| 4396 | U | 0.559 | 0.1238 |
| 4397 | G | 0.382 | 0.1741 |
| 4398 | C | 0.881 | 0.3326 |
| 4399 | A | 0.083 | 0.0606 |



|      |   |       |        |
|------|---|-------|--------|
| 4400 | A | 0.371 | 0.1082 |
| 4401 | U | 0.801 | 0.2607 |
| 4402 | A | 0.304 | 0.0413 |
| 4403 | C | 0.614 | 0.3486 |
| 4404 | G | 0.504 | 0.1280 |
| 4405 | A | 0.397 | 0.0475 |
| 4406 | C | 0.277 | 0.0424 |
| 4407 | A | 0.554 | 0.0348 |
| 4408 | C | 0.190 | 0.0540 |
| 4409 | C | 0.395 | 0.0382 |
| 4410 | A | 0.867 | 0.1222 |
| 4411 | A | 0.729 | 0.0684 |
| 4412 | G | 0.280 | 0.0078 |
| 4413 | A | 0.535 | 0.0316 |
| 4414 | U | 0.559 | 0.0683 |
| 4415 | U | 0.365 | 0.0259 |
| 4416 | A | 0.886 | 0.0581 |
| 4417 | U | 0.733 | 0.0558 |
| 4418 | A | 0.517 | 0.0760 |
| 4419 | A | 0.827 | 0.1169 |
| 4420 | A | 0.670 | 0.0740 |
| 4421 | U | 0.248 | 0.0179 |
| 4422 | C | 0.586 | 0.0393 |
| 4423 | U | 0.473 | 0.0429 |
| 4424 | A | 0.511 | 0.0130 |
| 4425 | G | 0.693 | 0.0328 |
| 4426 | G | 0.393 | 0.0432 |
| 4427 | C | 0.479 | 0.0029 |
| 4428 | G | 0.331 | 0.0485 |
| 4429 | A | 0.700 | 0.0796 |
| 4430 | A | 0.488 | 0.0256 |
| 4431 | A | 0.614 | 0.0428 |
| 4432 | G | 0.369 | 0.0263 |
| 4433 | U | 0.356 | 0.0015 |
| 4434 | G | 0.356 | 0.0246 |
| 4435 | A | 0.326 | 0.0589 |
| 4436 | U | 0.424 | 0.0605 |
| 4437 | G | 0.290 | 0.0406 |
| 4438 | A | 0.596 | 0.0707 |
| 4439 | G | 0.362 | 0.0217 |
| 4440 | G | 0.179 | 0.0413 |
| 4441 | A | 0.501 | 0.2568 |
| 4442 | A | 0.543 | 0.2062 |
| 4443 | A | 0.543 | 0.2306 |
| 4444 | U | 0.221 | 0.1255 |
| 4445 | U | 0.384 | 0.2103 |
| 4446 | C | 0.576 | 0.2167 |
| 4447 | A | 0.757 | 0.2906 |
| 4448 | A | 0.580 | 0.2533 |
| 4449 | U | 0.519 | 0.2319 |

|      |   |       |        |
|------|---|-------|--------|
| 4450 | A | 0.405 | 0.1008 |
| 4451 | U | 0.512 | 0.1392 |
| 4452 | G | 0.248 | 0.0293 |
| 4453 | A | 0.588 | 0.1872 |
| 4454 | C | 0.149 | 0.0618 |
| 4455 | A | 0.496 | 0.1240 |
| 4456 | U | 0.442 | 0.0837 |
| 4457 | A | 0.431 | 0.1035 |
| 4458 | C | 0.377 | 0.0671 |
| 4459 | U | 0.260 | 0.0352 |
| 4460 | U | 0.410 | 0.1040 |
| 4461 | G | 0.689 | 0.1613 |
| 4462 | G | 0.240 | 0.0651 |
| 4463 | C | 0.178 | 0.0192 |
| 4464 | U | 0.461 | 0.1717 |
| 4465 | U | 0.533 | 0.2097 |
| 4466 | A | 0.527 | 0.2127 |
| 4467 | G | 0.481 | 0.1422 |
| 4468 | A | 0.356 | 0.1600 |
| 4469 | A | 0.718 | 0.2360 |
| 4470 | A | 0.392 | 0.1288 |
| 4471 | U | 0.238 | 0.1234 |
| 4472 | C | 0.408 | 0.1706 |
| 4473 | A | 0.534 | 0.2858 |
| 4474 | A | 0.624 | 0.1690 |
| 4475 | A | 0.364 | 0.1475 |
| 4476 | U | 0.441 | 0.3124 |
| 4477 | A | 0.620 | 0.4732 |
| 4478 | U | 0.223 | 0.3578 |
| 4479 | C | 0.238 | 0.3525 |
| 4480 | A | 0.808 | 0.2333 |
| 4481 | A | 0.663 | 0.2132 |
| 4482 | A | 0.358 | 0.0247 |
| 4483 | G | 0.265 | 0.0279 |
| 4484 | A | 0.284 | 0.1078 |
| 4485 | G | 0.195 | 0.0237 |
| 4486 | G | 0.230 | 0.0417 |
| 4487 | U | 0.245 | 0.0859 |
| 4488 | A | 0.517 | 0.0778 |
| 4489 | A | 0.417 | 0.0279 |
| 4490 | A | 0.480 | 0.0007 |
| 4491 | U | 0.392 | 0.0375 |
| 4492 | A | 0.475 | 0.0156 |
| 4493 | C | 0.385 | 0.0187 |
| 4494 | A | 0.519 | 0.0046 |
| 4495 | U | 0.455 | 0.0067 |
| 4496 | G | 0.400 | 0.0191 |
| 4497 | A | 0.605 | 0.0134 |
| 4498 | A | 0.706 | 0.0619 |
| 4499 | A | 0.507 | 0.0619 |

|      |   |       |        |
|------|---|-------|--------|
| 4500 | U | 0.363 | 0.0187 |
| 4501 | U | 0.419 | 0.0499 |
| 4502 | A | 0.623 | 0.0849 |
| 4503 | G | 0.445 | 0.0209 |
| 4504 | G | 0.260 | 0.0552 |
| 4505 | U | 0.124 | 0.0011 |
| 4506 | A | 0.441 | 0.0000 |
| 4507 | U | 0.558 | 0.2864 |
| 4508 | G | 0.734 | 0.3726 |
| 4509 | G | 0.616 | 0.1584 |
| 4510 | A | 0.215 | 0.0728 |
| 4511 | A | 0.738 | 0.1768 |
| 4512 | A | 0.568 | 0.0134 |
| 4513 | A | 0.405 | 0.1237 |
| 4514 | C | 0.128 | 0.0262 |
| 4515 | U | 0.324 | 0.0283 |
| 4516 | C | 0.277 | 0.0290 |
| 4517 | A | 0.783 | 0.1973 |
| 4518 | U | -     | 0.0000 |
| 4519 | U | 0.354 | 0.0948 |
| 4520 | A | 1.076 | 0.1132 |
| 4521 | A | 0.718 | 0.1024 |
| 4522 | C | 0.149 | 0.0359 |
| 4523 | U | 0.534 | 0.0950 |
| 4524 | G | 0.363 | 0.1465 |
| 4525 | A | 0.422 | 0.0878 |
| 4526 | G | 0.546 | 0.0482 |
| 4527 | A | 0.753 | 0.1510 |
| 4528 | A | 0.837 | 0.4501 |
| 4529 | A | 0.544 | 0.2679 |
| 4530 | A | 0.218 | 0.1406 |
| 4531 | U | 0.426 | 0.1580 |
| 4532 | A | 0.513 | 0.1612 |
| 4533 | C | 0.227 | 0.0810 |
| 4534 | C | 0.154 | 0.0713 |
| 4535 | C | 0.250 | 0.0731 |
| 4536 | A | 0.501 | 0.1585 |
| 4537 | A | 0.537 | 0.1005 |
| 4538 | A | 0.404 | 0.1142 |
| 4539 | U | 0.614 | 0.1606 |
| 4540 | U | 0.467 | 0.2206 |
| 4541 | A | 0.567 | 0.3147 |
| 4542 | A | 0.455 | 0.1600 |
| 4543 | A | 0.449 | 0.1815 |
| 4544 | C | 0.450 | 0.2772 |
| 4545 | G | -     | 0.0000 |
| 4546 | U | 0.181 | 0.0668 |
| 4547 | A | 0.385 | 0.1188 |
| 4548 | C | 0.188 | 0.1099 |
| 4549 | C | 0.181 | 0.0710 |

|      |   |       |        |
|------|---|-------|--------|
| 4550 | U | 0.171 | 0.0831 |
| 4551 | U | -     | 0.0000 |
| 4552 | U | 0.437 | 0.1003 |
| 4553 | G | 0.447 | 0.0686 |
| 4554 | A | 0.307 | 0.0255 |
| 4555 | A | 0.431 | 0.0800 |
| 4556 | U | 0.386 | 0.1049 |
| 4557 | C | 0.316 | 0.0419 |
| 4558 | C | 0.288 | 0.0286 |
| 4559 | A | 0.416 | 0.1415 |
| 4560 | A | 0.545 | 0.1512 |
| 4561 | A | 0.607 | 0.0826 |
| 4562 | A | 0.772 | 0.1093 |
| 4563 | G | 0.349 | 0.1306 |
| 4564 | G | 0.695 | 0.2780 |
| 4565 | A | 1.127 | 0.4491 |
| 4566 | A | 0.943 | 0.2065 |
| 4567 | G | 0.734 | 0.1080 |
| 4568 | A | 0.089 | 0.0933 |
| 4569 | A | 0.570 | 0.0785 |
| 4570 | A | 0.649 | 0.0963 |
| 4571 | A | 0.398 | 0.0308 |
| 4572 | C | 0.305 | 0.0306 |
| 4573 | U | 0.269 | 0.0465 |
| 4574 | U | 0.788 | 0.0720 |
| 4575 | A | 0.562 | 0.0242 |
| 4576 | G | 0.343 | 0.0216 |
| 4577 | C | 0.206 | 0.2018 |
| 4578 | G | 0.255 | 0.0847 |
| 4579 | C | 0.236 | 0.1527 |
| 4580 | U | 0.224 | 0.1768 |
| 4581 | C | 0.142 | 0.0523 |
| 4582 | C | 0.346 | 0.0992 |
| 4583 | A | 0.644 | 0.1481 |
| 4584 | G | 0.760 | 0.1751 |
| 4585 | G | 0.479 | 0.1256 |
| 4586 | U | 0.095 | 0.0764 |
| 4587 | C | 0.164 | 0.0516 |
| 4588 | A | 0.277 | 0.1057 |
| 4589 | A | 0.363 | 0.0621 |
| 4590 | C | 0.286 | 0.0679 |
| 4591 | C | 1.258 | 0.4278 |
| 4592 | A | 0.270 | 0.1421 |
| 4593 | G | -     | 0.0000 |
| 4594 | G | -     | 0.0000 |
| 4595 | U | 0.865 | 0.2605 |
| 4596 | C | 0.269 | 0.1143 |
| 4597 | U | 0.236 | 0.1040 |
| 4598 | U | 0.214 | 0.0845 |
| 4599 | U | 0.420 | 0.2262 |

|      |   |       |        |
|------|---|-------|--------|
| 4600 | A | 1.603 | 0.2135 |
| 4601 | U | 0.235 | 0.1175 |
| 4602 | A | 0.523 | 0.0025 |
| 4603 | U | 0.417 | 0.0595 |
| 4604 | A | 0.332 | 0.1021 |
| 4605 | G | 0.237 | 0.0904 |
| 4606 | A | 0.199 | 0.0758 |
| 4607 | C | 0.155 | 0.1204 |
| 4608 | C | 0.607 | 0.0569 |
| 4609 | A | 1.011 | 0.1808 |
| 4610 | G | 1.746 | 0.0438 |
| 4611 | G | 0.895 | 0.1433 |
| 4612 | A | 0.578 | 0.1396 |
| 4613 | U | 0.105 | 0.0526 |
| 4614 | G | 0.690 | 0.1562 |
| 4615 | A | 0.421 | 0.1161 |
| 4616 | A | 0.215 | 0.0962 |
| 4617 | C | 0.423 | 0.1203 |
| 4618 | U | 0.466 | 0.1346 |
| 4619 | A | 0.506 | 0.0975 |
| 4620 | G | 0.817 | 0.1121 |
| 4621 | A | 0.394 | 0.0250 |
| 4622 | A | 0.376 | 0.0656 |
| 4623 | A | 0.584 | 0.0583 |
| 4624 | U | 0.515 | 0.1645 |
| 4625 | A | 0.652 | 0.1020 |
| 4626 | G | 1.037 | 0.0764 |
| 4627 | A | 0.617 | 0.0341 |
| 4628 | U | 0.425 | 0.0829 |
| 4629 | G | 0.720 | 0.0096 |
| 4630 | A | 0.535 | 0.0670 |
| 4631 | A | 0.647 | 0.1796 |
| 4632 | G | 0.706 | 0.0822 |
| 4633 | A | 0.417 | 0.0389 |
| 4634 | U | 0.483 | 0.0425 |
| 4635 | G | 0.352 | 0.1742 |
| 4636 | A | 0.212 | 0.1018 |
| 4637 | A | 0.413 | 0.0773 |
| 4638 | U | 0.274 | 0.0975 |
| 4639 | A | 0.641 | 0.0903 |
| 4640 | C | 0.599 | 0.1834 |
| 4641 | A | 0.808 | 0.0990 |
| 4642 | A | 0.941 | 0.1465 |
| 4643 | A | -     | 0.0000 |
| 4644 | G | 0.687 | 0.1288 |
| 4645 | A | 0.302 | 0.0705 |
| 4646 | G | 0.179 | 0.0830 |
| 4647 | A | 0.218 | 0.0512 |
| 4648 | A | -     | 0.0000 |
| 4649 | G | -     | 0.0000 |

|      |   |       |        |
|------|---|-------|--------|
| 4650 | G | -     | 0.0000 |
| 4651 | U | -     | 0.0000 |
| 4652 | A | -     | 0.0000 |
| 4653 | C | -     | 0.0000 |
| 4654 | A | 0.227 | 0.0626 |
| 4655 | U | 0.524 | 0.1240 |
| 4656 | G | 0.516 | 0.0260 |
| 4657 | A | 0.150 | 0.1744 |
| 4658 | A | 0.473 | 0.2147 |
| 4659 | A | -     | 0.0000 |
| 4660 | U | -     | 0.0000 |
| 4661 | G | -     | 0.0000 |
| 4662 | C | -     | 0.0000 |
| 4663 | A | -     | 0.0000 |
| 4664 | A | -     | 0.0000 |
| 4665 | A | 0.662 | 0.0820 |
| 4666 | A | 0.563 | 0.0432 |
| 4667 | G | 0.151 | 0.1382 |
| 4668 | U | 0.180 | 0.0707 |
| 4669 | U | 0.341 | 0.1502 |
| 4670 | G | 0.313 | 0.1301 |
| 4671 | A | 0.074 | 0.0163 |
| 4672 | U | 0.392 | 0.0728 |
| 4673 | U | 0.360 | 0.2242 |
| 4674 | G | 0.522 | 0.0163 |
| 4675 | G | 0.263 | 0.0233 |
| 4676 | U | 0.148 | 0.0219 |
| 4677 | C | 0.155 | 0.0548 |
| 4678 | U | 0.349 | 0.1002 |
| 4679 | A | 0.724 | 0.0878 |
| 4680 | G | 0.297 | 0.1031 |
| 4681 | C | 0.460 | 0.0486 |
| 4682 | U | 0.573 | 0.0794 |
| 4683 | U | 0.580 | 0.1069 |
| 4684 | C | 0.576 | 0.1944 |
| 4685 | A | 0.456 | 0.1296 |
| 4686 | U | 0.391 | 0.1501 |
| 4687 | A | 0.820 | 0.1481 |
| 4688 | U | 0.388 | 0.1563 |
| 4689 | G | 0.319 | 0.0959 |
| 4690 | U | 0.240 | 0.0580 |
| 4691 | U | 0.475 | 0.1017 |
| 4692 | G | 0.251 | 0.0537 |
| 4693 | G | 0.202 | 0.0735 |
| 4694 | A | 0.505 | 0.1899 |
| 4695 | U | 0.319 | 0.2059 |
| 4696 | A | 0.994 | 0.2021 |
| 4697 | U | 0.278 | 0.1441 |
| 4698 | A | 1.096 | 0.0789 |
| 4699 | A | -     | 0.0000 |

|      |   |       |        |
|------|---|-------|--------|
| 4700 | A | 1.274 | 0.2043 |
| 4701 | U | 0.189 | 0.0519 |
| 4702 | U | 0.325 | 0.0812 |
| 4703 | U | 0.464 | 0.2110 |
| 4704 | A | 0.884 | 0.0966 |
| 4705 | G | 0.870 | 0.2545 |
| 4706 | A | 0.999 | 0.9705 |
| 4707 | U | 0.746 | 0.3601 |
| 4708 | U | 0.213 | 0.2060 |
| 4709 | U | 0.589 | 0.1703 |
| 4710 | G | 0.790 | 0.0912 |
| 4711 | A | 1.010 | 0.0318 |
| 4712 | C | 0.273 | 0.0320 |
| 4713 | U | 0.837 | 0.0531 |
| 4714 | U | 0.811 | 0.0658 |
| 4715 | A | 0.931 | 0.0707 |
| 4716 | C | 0.591 | 0.1631 |
| 4717 | U | 0.372 | 0.0989 |
| 4718 | A | 0.913 | 0.1275 |
| 4719 | U | 0.959 | 0.0737 |
| 4720 | A | 0.552 | 0.0988 |
| 4721 | C | 0.485 | 0.0394 |
| 4722 | U | 0.884 | 0.0362 |
| 4723 | A | 0.672 | 0.1404 |
| 4724 | C | 0.528 | 0.0594 |
| 4725 | A | 1.042 | 0.0728 |
| 4726 | U | 0.486 | 0.0689 |
| 4727 | C | 0.863 | 0.0287 |
| 4728 | A | 0.763 | 0.1000 |
| 4729 | A | 0.916 | 0.1487 |
| 4730 | C | 0.401 | 0.0307 |
| 4731 | A | 0.851 | 0.1144 |
| 4732 | C | 0.508 | 0.1158 |
| 4733 | A | 0.946 | 0.1187 |
| 4734 | C | 0.453 | 0.1595 |
| 4735 | U | 0.741 | 0.1820 |
| 4736 | U | 0.716 | 0.1231 |
| 4737 | G | 0.571 | 0.1534 |
| 4738 | C | 0.654 | 0.2046 |
| 4739 | U | 0.481 | 0.0900 |
| 4740 | C | 0.956 | 0.2770 |
| 4741 | A | 0.894 | 0.2322 |
| 4742 | A | 0.962 | 0.1850 |
| 4743 | C | 0.593 | 0.0951 |
| 4744 | A | 0.917 | 0.1210 |
| 4745 | U | 0.492 | 0.0429 |
| 4746 | A | 0.899 | 0.0944 |
| 4747 | U | 0.681 | 0.0938 |
| 4748 | A | 0.821 | 0.0709 |
| 4749 | C | 0.551 | 0.0254 |

|      |   |       |        |
|------|---|-------|--------|
| 4750 | U | 0.819 | 0.0466 |
| 4751 | A | 0.713 | 0.1826 |
| 4752 | U | 0.532 | 0.0539 |
| 4753 | U | 0.384 | 0.0254 |
| 4754 | C | 0.475 | 0.0872 |
| 4755 | C | 0.261 | 0.0300 |
| 4756 | C | 0.527 | 0.1355 |
| 4757 | C | 0.611 | 0.1351 |
| 4758 | U | 0.521 | 0.1862 |
| 4759 | C | 0.572 | 0.1746 |
| 4760 | U | 0.419 | 0.1074 |
| 4761 | A | 0.893 | 0.1813 |
| 4762 | G | 0.670 | 0.1522 |
| 4763 | G | 0.210 | 0.0708 |
| 4764 | C | 0.366 | 0.1385 |
| 4765 | A | 0.601 | 0.1989 |
| 4766 | A | 0.650 | 0.1591 |
| 4767 | G | 0.748 | 0.1609 |
| 4768 | U | 0.521 | 0.2318 |
| 4769 | U | 0.345 | 0.0734 |
| 4770 | U | 0.705 | 0.2596 |
| 4771 | U | 0.702 | 0.2158 |
| 4772 | A | 0.980 | 0.3122 |
| 4773 | G | 0.807 | 0.1666 |
| 4774 | A | 0.569 | 0.1467 |
| 4775 | C | 0.722 | 0.2731 |
| 4776 | A | 0.560 | 0.1811 |
| 4777 | U | 0.526 | 0.1093 |
| 4778 | G | 0.479 | 0.1034 |
| 4779 | A | 0.533 | 0.1151 |
| 4780 | C | 0.439 | 0.1534 |
| 4781 | A | 0.579 | 0.2014 |
| 4782 | U | 0.473 | 0.1670 |
| 4783 | A | 0.304 | 0.1273 |
| 4784 | U | 0.517 | 0.2338 |
| 4785 | G | 0.494 | 0.1706 |
| 4786 | A | 0.369 | 0.1187 |
| 4787 | G | 0.345 | 0.2162 |
| 4788 | U | 0.372 | 0.1804 |
| 4789 | U | 0.454 | 0.2651 |
| 4790 | G | 0.412 | 0.2168 |
| 4791 | A | 0.583 | 0.2671 |
| 4792 | U | 0.395 | 0.1797 |
| 4793 | A | 0.820 | 0.2962 |
| 4794 | C | 0.550 | 0.1713 |
| 4795 | A | 0.604 | 0.2326 |
| 4796 | A | 0.855 | 0.4144 |
| 4797 | U | 0.616 | 0.2701 |
| 4798 | U | 0.476 | 0.1762 |
| 4799 | C | 0.659 | 0.2366 |



|      |   |       |        |
|------|---|-------|--------|
| 4800 | A | 0.551 | 0.2521 |
| 4801 | U | 0.435 | 0.1926 |
| 4802 | G | 0.275 | 0.0738 |
| 4803 | U | 0.519 | 0.1735 |
| 4804 | G | 0.257 | 0.0801 |
| 4805 | G | 0.288 | 0.0827 |
| 4806 | G | 0.235 | 0.0357 |
| 4807 | A | 0.601 | 0.1182 |
| 4808 | C | 0.368 | 0.0990 |
| 4809 | A | 0.402 | 0.1068 |
| 4810 | C | 0.272 | 0.0924 |
| 4811 | U | 0.237 | 0.0627 |
| 4812 | A | 0.507 | 0.0853 |
| 4813 | G | 0.326 | 0.1172 |
| 4814 | A | 0.548 | 0.1627 |
| 4815 | G | 0.350 | 0.1069 |
| 4816 | A | 0.612 | 0.2279 |
| 4817 | U | 0.461 | 0.1763 |
| 4818 | A | 0.495 | 0.1490 |
| 4819 | A | 0.751 | 0.3859 |
| 4820 | A | 0.249 | 0.1816 |
| 4821 | C | 0.216 | 0.0852 |
| 4822 | A | 0.352 | 0.1760 |
| 4823 | A | 0.417 | 0.1484 |
| 4824 | C | 0.227 | 0.1011 |
| 4825 | U | 0.289 | 0.1589 |
| 4826 | G | 0.140 | 0.0035 |
| 4827 | A | 0.280 | 0.0106 |
| 4828 | U | 0.231 | 0.0906 |
| 4829 | A | 0.244 | 0.1039 |
| 4830 | U | 0.305 | 0.1824 |
| 4831 | G | 0.281 | 0.1253 |
| 4832 | G | 0.229 | 0.0413 |
| 4833 | C | 0.196 | 0.0954 |
| 4834 | A | 0.389 | 0.0886 |
| 4835 | C | 0.240 | 0.0096 |
| 4836 | A | 0.473 | 0.2179 |
| 4837 | A | 0.514 | 0.0941 |
| 4838 | A | 0.507 | 0.0679 |
| 4839 | A | 0.481 | 0.1579 |
| 4840 | A | 0.478 | 0.1001 |
| 4841 | C | 0.381 | 0.1250 |
| 4842 | A | 0.345 | 0.0759 |
| 4843 | A | 0.524 | 0.0825 |
| 4844 | A | 0.494 | 0.0342 |
| 4845 | C | 0.183 | 0.0457 |
| 4846 | C | 0.116 | 0.0211 |
| 4847 | U | 0.274 | 0.0318 |
| 4848 | A | 0.381 | 0.0541 |
| 4849 | C | 0.087 | 0.0606 |

|      |   |       |        |
|------|---|-------|--------|
| 4850 | C | 0.332 | 0.1912 |
| 4851 | G | 0.248 | 0.2468 |
| 4852 | A | 0.328 | 0.2732 |
| 4853 | G | 0.250 | 0.2242 |
| 4854 | C | 0.168 | 0.0821 |
| 4855 | C | 0.102 | 0.0453 |
| 4856 | A | 0.119 | 0.0801 |
| 4857 | G | 0.090 | 0.1537 |
| 4858 | A | -     | 0.0000 |
| 4859 | U | 0.272 | 0.2037 |
| 4860 | A | 0.187 | 0.0552 |
| 4861 | A | 0.424 | 0.0895 |
| 4862 | U | 0.589 | 0.3114 |
| 4863 | A | 0.891 | 0.2265 |
| 4864 | A | 1.306 | 0.0781 |
| 4865 | A | 0.744 | 0.1599 |
| 4866 | C | 0.402 | 0.0448 |
| 4867 | U | 0.637 | 0.0454 |
| 4868 | A | -     | 0.0000 |
| 4869 | G | -     | 0.0000 |
| 4870 | U | -     | 0.0000 |
| 4871 | C | -     | 0.0000 |
| 4872 | G | -     | 0.0000 |
| 4873 | C | -     | 0.0000 |
| 4874 | A | -     | 0.0000 |
| 4875 | A | -     | 0.0000 |
| 4876 | U | -     | 0.0000 |
| 4877 | A | -     | 0.0000 |
| 4878 | A | -     | 0.0000 |
| 4879 | G | -     | 0.0000 |
| 4880 | U | -     | 0.0000 |
| 4881 | G | -     | 0.0000 |
| 4882 | A | -     | 0.0000 |
| 4883 | U | 0.450 | 0.1221 |
| 4884 | G | 0.471 | 0.0312 |
| 4885 | C | 0.016 | 0.0132 |
| 4886 | U | -     | 0.0000 |
| 4887 | U | 0.165 | 0.1024 |
| 4888 | C | 0.225 | 0.2674 |
| 4889 | G | 0.527 | 0.1604 |
| 4890 | U | 0.168 | 0.0864 |
| 4891 | A | 0.507 | 0.0251 |
| 4892 | U | 0.243 | 0.2173 |
| 4893 | G | 0.249 | 0.1231 |
| 4894 | G | 0.116 | 0.0500 |
| 4895 | C | 0.047 | 0.1325 |
| 4896 | A | -     | 0.0000 |
| 4897 | A | -     | 0.0000 |
| 4898 | C | 0.240 | 0.2247 |
| 4899 | C | 0.455 | 0.5658 |

|      |   |       |        |
|------|---|-------|--------|
| 4900 | A | -     | 0.0000 |
| 4901 | A | 0.403 | 0.1722 |
| 4902 | C | 0.248 | 0.0305 |
| 4903 | C | 0.266 | 0.0817 |
| 4904 | G | 0.192 | 0.0156 |
| 4905 | U | 0.180 | 0.0237 |
| 4906 | A | 0.304 | 0.0506 |
| 4907 | U | 0.057 | 0.2621 |
| 4908 | U | -     | 0.0000 |
| 4909 | A | -     | 0.0000 |
| 4910 | U | -     | 0.0000 |
| 4911 | A | -     | 0.0000 |
| 4912 | A | -     | 0.0000 |
| 4913 | A | -     | 0.0000 |
| 4914 | U | -     | 0.0000 |
| 4915 | C | -     | 0.0000 |
| 4916 | A | -     | 0.0000 |
| 4917 | C | 0.106 | 0.2743 |
| 4918 | A | 0.256 | 0.3019 |
| 4919 | A | 0.223 | 0.2526 |
| 4920 | A | 0.200 | 0.1763 |
| 4921 | U | 0.220 | 0.3862 |
| 4922 | U | -     | 0.0000 |
| 4923 | G | 0.153 | 0.0000 |
| 4924 | G | 0.461 | 0.0000 |
| 4925 | C | 0.238 | 0.0000 |
| 4926 | A | -     | 0.0000 |
| 4927 | A | 0.301 | 0.0406 |
| 4928 | C | 0.743 | 0.0752 |
| 4929 | A | 0.209 | 0.1074 |
| 4930 | U | 0.307 | 0.0718 |
| 4931 | A | 0.082 | 0.5357 |
| 4932 | U | 0.369 | 0.2859 |
| 4933 | A | 0.297 | 0.0839 |
| 4934 | U | 0.235 | 0.1175 |
| 4935 | U | 0.067 | 0.0209 |
| 4936 | U | 0.090 | 0.1942 |
| 4937 | A | 0.283 | 0.0841 |
| 4938 | C | 0.143 | 0.0358 |
| 4939 | U | 0.230 | 0.1064 |
| 4940 | U | 0.232 | 0.1382 |
| 4941 | A | 0.147 | 0.0109 |
| 4942 | A | 0.304 | 0.0594 |
| 4943 | U | 0.191 | 0.0696 |
| 4944 | G | 0.028 | 0.0877 |
| 4945 | G | 0.031 | 0.0162 |
| 4946 | A | 0.613 | 0.0845 |
| 4947 | A | 0.350 | 0.0872 |
| 4948 | A | 2.305 | 0.0317 |
| 4949 | G | 0.289 | 0.0463 |

|      |   |       |        |
|------|---|-------|--------|
| 4950 | G | 0.285 | 0.0545 |
| 4951 | U | 0.312 | 0.0431 |
| 4952 | A | 0.075 | 0.1352 |
| 4953 | A | 0.334 | 0.6771 |
| 4954 | U | 0.201 | 0.0700 |
| 4955 | U | 0.332 | 0.0225 |
| 4956 | G | 0.099 | 0.0365 |
| 4957 | G | 0.892 | 0.0454 |
| 4958 | A | -     | 0.0000 |
| 4959 | G | 0.359 | 0.1655 |
| 4960 | G | 0.075 | 0.0639 |
| 4961 | A | 0.318 | 0.0340 |
| 4962 | A | 1.060 | 0.0217 |
| 4963 | A | 0.350 | 0.0272 |
| 4964 | G | 0.676 | 0.0211 |
| 4965 | U | 0.552 | 0.0666 |
| 4966 | C | 0.123 | 0.0410 |
| 4967 | C | 2.176 | 0.2723 |
| 4968 | A | 1.906 | 1.3484 |
| 4969 | C | 0.435 | 1.0905 |
| 4970 | C | 0.319 | 0.5321 |
| 4971 | A | 1.521 | 0.2132 |
| 4972 | A | 1.941 | 0.1489 |
| 4973 | G | 0.667 | 0.1526 |
| 4974 | G | -     | 0.0000 |
| 4975 | C | 1.732 | 0.0514 |
| 4976 | U | 0.708 | 0.1011 |
| 4977 | U | 0.345 | 0.0727 |
| 4978 | C | 0.141 | 0.0148 |
| 4979 | A | 0.561 | 0.0599 |
| 4980 | U | 0.433 | 0.0615 |
| 4981 | U | 0.025 | 0.0558 |
| 4982 | A | 0.090 | 0.0940 |
| 4983 | A | 0.541 | 0.0109 |
| 4984 | C | 0.345 | 0.2108 |
| 4985 | A | 0.682 | 0.0349 |
| 4986 | U | 0.501 | 0.0184 |
| 4987 | G | 0.008 | 0.0395 |
| 4988 | U | 0.278 | 0.0746 |
| 4989 | A | 0.019 | 0.0195 |
| 4990 | C | 0.083 | 0.0696 |
| 4991 | U | 0.066 | 0.0584 |
| 4992 | U | 0.122 | 0.0638 |
| 4993 | C | -     | 0.0000 |
| 4994 | A | 0.542 | 0.1066 |
| 4995 | A | 0.202 | 0.0667 |
| 4996 | C | 0.631 | 0.1247 |
| 4997 | U | 0.461 | 0.1109 |
| 4998 | A | 0.390 | 0.1250 |
| 4999 | C | 0.393 | 0.1107 |

|      |   |       |        |
|------|---|-------|--------|
| 5000 | G | 0.614 | 0.0146 |
| 5001 | G | 1.794 | 0.1097 |
| 5002 | A | 1.575 | 0.0805 |
| 5003 | A | 2.085 | 0.0826 |
| 5004 | G | 1.618 | 0.0456 |
| 5005 | C | -     | 0.0000 |
| 5006 | A | 1.943 | 0.0807 |
| 5007 | G | 0.869 | 0.0469 |
| 5008 | A | 0.161 | 0.0619 |
| 5009 | A | 0.349 | 0.1150 |
| 5010 | A | 0.340 | 0.0299 |
| 5011 | U | 0.405 | 0.0576 |
| 5012 | A | 0.360 | 0.0871 |
| 5013 | C | 0.789 | 0.0084 |
| 5014 | A | 0.439 | 0.0395 |
| 5015 | C | 0.437 | 0.0768 |
| 5016 | G | 0.517 | 0.0706 |
| 5017 | C | 0.525 | 0.2353 |
| 5018 | G | 0.466 | 0.4474 |
| 5019 | A | 0.473 | 0.2030 |
| 5020 | U | 0.630 | 0.2788 |
| 5021 | A | 1.748 | 0.1867 |
| 5022 | A | 0.935 | 0.1463 |
| 5023 | G | 1.188 | 0.1838 |
| 5024 | U | 0.701 | 0.1765 |
| 5025 | G | 0.639 | 0.0285 |
| 5026 | A | 0.899 | 0.0775 |
| 5027 | A | 1.519 | 0.0196 |
| 5028 | U | 0.404 | 0.1839 |
| 5029 | C | 0.501 | 0.0733 |
| 5030 | U | 0.208 | 0.0997 |
| 5031 | G | 0.557 | 0.1324 |
| 5032 | U | 0.405 | 0.1484 |
| 5033 | C | 0.227 | 0.0367 |
| 5034 | C | 0.107 | 0.0313 |
| 5035 | C | 0.511 | 0.0142 |
| 5036 | A | 0.341 | 0.0810 |
| 5037 | U | -     | 0.0000 |
| 5038 | U | 0.251 | 0.1397 |
| 5039 | A | 0.415 | 0.0989 |
| 5040 | U | 0.442 | 0.0983 |
| 5041 | U | 1.198 | 0.1813 |
| 5042 | A | 0.542 | 0.3415 |
| 5043 | A | 0.342 | 0.0863 |
| 5044 | A | 0.190 | 0.0742 |
| 5045 | U | 0.339 | 0.4681 |
| 5046 | A | 0.411 | 0.1082 |
| 5047 | A | 0.225 | 0.1294 |
| 5048 | U | -     | 0.0000 |
| 5049 | C | 0.738 | 0.1556 |

|      |   |       |        |
|------|---|-------|--------|
| 5050 | U | 0.528 | 0.0134 |
| 5051 | A | 0.710 | 0.1612 |
| 5052 | A | 0.514 | 0.2680 |
| 5053 | G | 0.157 | 0.1655 |
| 5054 | U | 0.034 | 0.0049 |
| 5055 | U | 0.171 | 0.0000 |
| 5056 | A | 0.348 | 0.1541 |
| 5057 | C | 0.131 | 0.1138 |
| 5058 | C | 0.239 | 0.0000 |
| 5059 | U | 0.358 | 0.0488 |
| 5060 | G | 0.096 | 0.0000 |
| 5061 | A | 0.482 | 0.1612 |
| 5062 | U | 0.254 | 0.0700 |
| 5063 | A | 0.172 | 0.1775 |
| 5064 | C | 0.278 | 0.0021 |
| 5065 | A | 0.480 | 0.0700 |
| 5066 | A | 0.519 | 0.1315 |
| 5067 | G | 0.471 | 0.1039 |
| 5068 | A | 0.378 | 0.0000 |
| 5069 | A | 0.577 | 0.1365 |
| 5070 | C | 0.701 | 0.0000 |
| 5071 | U | 0.416 | 0.0007 |
| 5072 | U | 0.651 | 0.3231 |
| 5073 | A | 0.645 | 0.1980 |
| 5074 | A | 0.514 | 0.0431 |
| 5075 | C | 0.511 | 0.1351 |
| 5076 | A | 0.614 | 0.2934 |
| 5077 | A | 0.459 | 0.0071 |
| 5078 | G | 0.452 | 0.2623 |
| 5079 | A | 0.299 | 0.1365 |
| 5080 | A | 0.285 | 0.0240 |
| 5081 | A | 0.236 | 0.2390 |
| 5082 | C | -     | 0.0000 |
| 5083 | C | -     | 0.0000 |
| 5084 | A | -     | 0.0000 |
| 5085 | A | 0.331 | 0.2355 |
| 5086 | U | 0.308 | 0.2779 |
| 5087 | U | 0.466 | 0.0290 |
| 5088 | A | 0.760 | 0.0912 |
| 5089 | U | 0.720 | 0.0318 |
| 5090 | U | 0.323 | 0.1011 |
| 5091 | A | 0.407 | 0.2560 |
| 5092 | A | 0.392 | 0.0445 |
| 5093 | A | 0.594 | 0.0042 |
| 5094 | G | 0.660 | 0.2934 |
| 5095 | G | 0.374 | 0.2949 |
| 5096 | C | 0.262 | 0.1280 |
| 5097 | U | 0.395 | 0.4327 |
| 5098 | U | 0.267 | 0.0000 |
| 5099 | A | 0.581 | 0.1584 |

|      |   |       |        |
|------|---|-------|--------|
| 5100 | C | 0.318 | 0.1358 |
| 5101 | U | 0.447 | 0.1110 |
| 5102 | U | 0.386 | 0.0000 |
| 5103 | A | 0.592 | 0.5346 |
| 5104 | C | 0.539 | 0.0000 |
| 5105 | U | 0.475 | 0.0693 |
| 5106 | G | 0.568 | 0.5190 |
| 5107 | A | 0.319 | 0.2291 |
| 5108 | U | 0.324 | 0.0000 |
| 5109 | A | 0.400 | 0.2022 |
| 5110 | G | 0.935 | 0.2397 |
| 5111 | U | 0.731 | 0.1146 |
| 5112 | A | 0.911 | 0.2107 |
| 5113 | G | 0.367 | 0.1131 |
| 5114 | A | 0.701 | 0.1237 |
| 5115 | U | 0.443 | 0.0000 |
| 5116 | C | 0.522 | 0.1138 |
| 5117 | A | 0.701 | 0.2687 |
| 5118 | A | 0.562 | 0.1626 |
| 5119 | C | 0.541 | 0.1980 |
| 5120 | G | 0.519 | 0.0000 |
| 5121 | A | 0.372 | 0.0764 |
| 5122 | U | 0.168 | 0.5827 |
| 5123 | C | 0.235 | 0.0000 |
| 5124 | A | 0.380 | 0.2574 |
| 5125 | G | 0.521 | 0.0608 |
| 5126 | U | 0.258 | 0.0205 |
| 5127 | A | 0.666 | 0.3111 |
| 5128 | U | 0.681 | 0.2312 |
| 5129 | A | 0.793 | 0.2029 |
| 5130 | A | 0.742 | 0.2348 |
| 5131 | U | 0.464 | 0.0000 |
| 5132 | U | 0.507 | 0.0014 |
| 5133 | A | 0.429 | 0.2432 |
| 5134 | A | 0.266 | 0.0834 |
| 5135 | G | 0.203 | 0.2567 |
| 5136 | U | 0.198 | 0.0396 |
| 5137 | C | 0.315 | 0.2312 |
| 5138 | U | 0.502 | 0.0000 |
| 5139 | A | 0.538 | 0.0000 |
| 5140 | C | 0.367 | 0.0495 |
| 5141 | A | 0.427 | 0.2546 |
| 5142 | A | 0.424 | 0.3366 |
| 5143 | A | 0.384 | 0.1506 |
| 5144 | U | 0.483 | 0.2835 |
| 5145 | G | 0.279 | 0.2496 |
| 5146 | A | 1.518 | 0.0502 |
| 5147 | A | 0.815 | 0.1831 |
| 5148 | G | 0.760 | 0.1450 |
| 5149 | A | 0.584 | 0.3090 |

|      |   |       |        |
|------|---|-------|--------|
| 5150 | G | 0.444 | 0.3642 |
| 5151 | A | 0.426 | 0.2751 |
| 5152 | A | 0.514 | 0.1223 |
| 5153 | A | 0.535 | 0.0000 |
| 5154 | U | 0.380 | 0.5289 |
| 5155 | U | 0.378 | 0.2100 |
| 5156 | U | 0.525 | 0.0573 |
| 5157 | A | 0.939 | 0.0000 |
| 5158 | G | 0.672 | 0.0000 |
| 5159 | A | 0.527 | 0.3507 |
| 5160 | A | 0.493 | 0.4342 |
| 5161 | A | 0.507 | 0.2800 |
| 5162 | C | 0.385 | 0.3528 |
| 5163 | A | 0.586 | 0.1294 |
| 5164 | G | 0.410 | 0.2765 |
| 5165 | A | 0.382 | 0.0000 |
| 5166 | U | 0.495 | 0.0000 |
| 5167 | U | 0.408 | 0.0000 |
| 5168 | U | 0.484 | 0.0000 |
| 5169 | U | 0.494 | 0.0672 |
| 5170 | U | 0.720 | 0.1322 |
| 5171 | U | 0.574 | 0.0658 |
| 5172 | G | 0.574 | 0.0785 |
| 5173 | G | 0.536 | 0.3359 |
| 5174 | C | 0.672 | 0.1994 |
| 5175 | A | 0.685 | 0.0354 |
| 5176 | C | 0.772 | 0.1245 |
| 5177 | A | 0.592 | 0.0000 |
| 5178 | A | 0.428 | 0.0000 |
| 5179 | A | 0.853 | 0.1153 |
| 5180 | G | 0.530 | 0.0849 |
| 5181 | G | 0.436 | 0.0912 |
| 5182 | C | 0.243 | 0.4320 |
| 5183 | A | 0.446 | 0.1287 |
| 5184 | A | 0.373 | 0.1075 |
| 5185 | U | 0.423 | 0.1379 |
| 5186 | G | 0.345 | 0.0438 |
| 5187 | A | 0.524 | 0.2029 |
| 5188 | G | 0.477 | 0.2418 |
| 5189 | A | 0.404 | 0.4236 |
| 5190 | C | 0.382 | 0.3076 |
| 5191 | U | 0.357 | 0.1372 |
| 5192 | U | 0.260 | 0.2687 |
| 5193 | A | 0.493 | 0.2065 |
| 5194 | G | 0.215 | 0.0566 |
| 5195 | A | 0.513 | 0.2143 |
| 5196 | G | 0.502 | 0.0990 |
| 5197 | A | 0.581 | 0.0269 |
| 5198 | U | 0.420 | 0.1909 |
| 5199 | G | 0.360 | 0.1923 |



|      |   |       |        |
|------|---|-------|--------|
| 5200 | A | 0.487 | 0.0000 |
| 5201 | A | 0.474 | 0.0000 |
| 5202 | G | 0.324 | 0.7234 |
| 5203 | U | 0.409 | 0.6583 |
| 5204 | A | 0.385 | 0.1414 |
| 5205 | U | 0.109 | 0.0467 |
| 5206 | C | 0.477 | 0.0594 |
| 5207 | A | 0.706 | 0.3041 |
| 5208 | G | 0.464 | 0.3472 |
| 5209 | G | 0.495 | 0.0658 |
| 5210 | U | 0.191 | 0.1819 |
| 5211 | A | 0.411 | 0.1397 |
| 5212 | A | 0.464 | 0.3845 |
| 5213 | U | 0.412 | 0.0000 |
| 5214 | A | 0.590 | 0.6293 |
| 5215 | A | 0.679 | 0.6611 |
| 5216 | U | 0.747 | 0.0416 |
| 5217 | U | 0.850 | 0.4532 |
| 5218 | U | 0.503 | 0.1241 |
| 5219 | A | 0.413 | 0.0000 |
| 5220 | U | 0.372 | 0.1276 |
| 5221 | A | 0.539 | 0.3239 |
| 5222 | C | 0.537 | 0.0514 |
| 5223 | G | 0.552 | 0.0843 |
| 5224 | U | 0.418 | 0.2921 |
| 5225 | A | 0.471 | 0.0040 |
| 5226 | U | 0.606 | 0.1264 |
| 5227 | A | 0.355 | 0.1940 |
| 5228 | C | 0.385 | 0.0491 |
| 5229 | U | 0.731 | 0.5866 |
| 5230 | A | 0.131 | 0.1830 |
| 5231 | C | 0.188 | 0.0479 |
| 5232 | A | 0.561 | 0.2477 |
| 5233 | U | 0.435 | 0.3054 |
| 5234 | C | 0.610 | 0.2315 |
| 5235 | G | 0.593 | 0.2332 |
| 5236 | A | 0.631 | 0.2939 |
| 5237 | G | 0.946 | 0.1334 |
| 5238 | A | 0.772 | 0.1882 |
| 5239 | C | 0.135 | 0.0410 |
| 5240 | C | 0.545 | 0.0658 |
| 5241 | A | 0.660 | 0.2748 |
| 5242 | A | 0.580 | 0.5046 |
| 5243 | G | 0.357 | 0.2055 |
| 5244 | A | 0.565 | 0.3828 |
| 5245 | A | 0.736 | 0.1189 |
| 5246 | G | 0.693 | 0.3060 |
| 5247 | A | 0.724 | 0.1749 |
| 5248 | A | 0.808 | 0.3741 |
| 5249 | C | 0.445 | 0.0554 |

|      |   |       |        |
|------|---|-------|--------|
| 5250 | A | 0.599 | 0.1876 |
| 5251 | U | 0.098 | 0.0277 |
| 5252 | U | 0.398 | 0.0006 |
| 5253 | G | 0.688 | 0.0254 |
| 5254 | C | 0.356 | 0.0000 |
| 5255 | U | 0.325 | 0.2107 |
| 5256 | G | 0.580 | 0.0098 |
| 5257 | A | 0.333 | 0.0323 |
| 5258 | U | 0.488 | 0.0318 |
| 5259 | G | 0.620 | 0.1380 |
| 5260 | U | 0.515 | 0.0000 |
| 5261 | G | 0.295 | 0.0548 |
| 5262 | A | 0.956 | 0.3799 |
| 5263 | U | 0.429 | 0.2858 |
| 5264 | G | 0.376 | 0.0179 |
| 5265 | A | 0.435 | 0.1744 |
| 5266 | C | 0.523 | 0.1738 |
| 5267 | A | 0.356 | 0.0173 |
| 5268 | A | 0.784 | 0.0849 |
| 5269 | A | 0.596 | 0.3222 |
| 5270 | A | 0.916 | 0.2217 |
| 5271 | C | 0.403 | 0.1553 |
| 5272 | C | 0.509 | 0.2789 |
| 5273 | U | 0.953 | 0.3597 |
| 5274 | C | 0.552 | 0.2460 |
| 5275 | U | 1.159 | 1.1749 |
| 5276 | U | 0.316 | 0.1068 |
| 5277 | C | 0.582 | 0.3914 |
| 5278 | C | 0.312 | 0.0098 |
| 5279 | G | 0.721 | 0.0000 |
| 5280 | A | 0.623 | 0.4388 |
| 5281 | U | 1.308 | 1.3498 |
| 5282 | A | 1.061 | 0.9803 |
| 5283 | A | 1.115 | 0.8216 |
| 5284 | A | 0.685 | 0.3262 |
| 5285 | A | 0.575 | 0.5606 |
| 5286 | A | 0.895 | 0.5283 |
| 5287 | C | 1.439 | 0.3868 |
| 5288 | A | -     | 0.0000 |
| 5289 | U | 0.964 | 0.1871 |
| 5290 | U | 1.002 | 0.4498 |
| 5291 | U | 0.606 | 0.0254 |
| 5292 | A | 0.900 | 0.1374 |
| 5293 | A | 0.914 | 0.6022 |
| 5294 | A | 0.855 | 0.8268 |
| 5295 | C | 0.571 | 0.2500 |
| 5296 | U | 0.534 | 0.0023 |
| 5297 | A | 0.781 | 0.2731 |
| 5298 | U | 0.607 | 0.6801 |
| 5299 | U | 0.226 | 0.1039 |

|      |   |       |        |
|------|---|-------|--------|
| 5300 | A | 0.718 | 0.0000 |
| 5301 | A | 0.657 | 0.7309 |
| 5302 | C | 0.678 | 0.5797 |
| 5303 | U | -     | 0.0000 |
| 5304 | A | 0.600 | 0.3753 |
| 5305 | A | 0.953 | 0.6830 |
| 5306 | C | 0.719 | 0.3730 |
| 5307 | A | 0.287 | 0.1120 |
| 5308 | A | 0.536 | 0.4861 |
| 5309 | A | 0.737 | 0.0000 |
| 5310 | U | 0.593 | 0.0000 |
| 5311 | G | 0.738 | 0.0000 |
| 5312 | G | 0.826 | 0.0256 |
| 5313 | A | 0.160 | 0.1547 |
| 5314 | U | 0.337 | 0.1420 |
| 5315 | U | 0.252 | 0.2102 |
| 5316 | C | 0.498 | 0.3239 |
| 5317 | A | 0.516 | 0.1380 |
| 5318 | U | 0.452 | 0.3441 |
| 5319 | U | 0.328 | 0.0981 |
| 5320 | A | 0.514 | 0.3170 |
| 5321 | G | 0.224 | 0.1005 |
| 5322 | A | 0.220 | 0.0023 |
| 5323 | U | 0.514 | 0.0658 |
| 5324 | C | 0.363 | 0.2633 |
| 5325 | U | 0.036 | 0.0000 |
| 5326 | A | 0.214 | 0.0277 |
| 5327 | U | 0.467 | 0.4070 |
| 5328 | C | 0.403 | 0.4157 |
| 5329 | G | 0.432 | 0.3620 |
| 5330 | A | 0.290 | 0.1045 |
| 5331 | U | 0.448 | 0.3066 |
| 5332 | A | 0.530 | 0.1276 |
| 5333 | G | 0.254 | 0.2679 |
| 5334 | A | 0.413 | 0.0219 |
| 5335 | U | 0.459 | 0.1726 |
| 5336 | C | 0.295 | 0.1149 |
| 5337 | U | 0.109 | 0.1039 |
| 5338 | A | 0.620 | 0.2524 |
| 5339 | U | 0.199 | 0.1351 |
| 5340 | U | 0.218 | 0.0149 |
| 5341 | A | 0.378 | 0.2027 |
| 5342 | C | 0.692 | 0.1424 |
| 5343 | A | 0.266 | 0.1640 |
| 5344 | U | 0.545 | 0.2418 |
| 5345 | U | 0.219 | 0.2084 |
| 5346 | A | 0.263 | 0.1253 |
| 5347 | U | 0.488 | 0.3679 |
| 5348 | G | 0.875 | 0.4772 |
| 5349 | G | 0.288 | 0.1171 |

|      |   |       |        |
|------|---|-------|--------|
| 5350 | G | 0.111 | 0.0554 |
| 5351 | U | 0.217 | 0.0141 |
| 5352 | G | 0.473 | 0.4050 |
| 5353 | G | 0.260 | 0.0824 |
| 5354 | U | -     | 0.0000 |
| 5355 | A | 0.204 | 0.2262 |
| 5356 | U | 0.391 | 0.1477 |
| 5357 | G | 0.354 | 0.3499 |
| 5358 | U | 0.210 | 0.0518 |
| 5359 | U | 0.051 | 0.0242 |
| 5360 | G | 0.140 | 0.0908 |
| 5361 | G | 0.344 | 0.0662 |
| 5362 | A | 0.077 | 0.1398 |
| 5363 | A | 0.168 | 0.1357 |
| 5364 | U | 0.454 | 0.3787 |
| 5365 | A | 0.364 | 0.2819 |
| 5366 | G | 0.887 | 0.1391 |
| 5367 | A | 0.581 | 0.2825 |
| 5368 | A | 0.546 | 0.1591 |
| 5369 | A | 0.605 | 0.2091 |
| 5370 | U | 0.636 | 0.1624 |
| 5371 | C | 0.135 | 0.0964 |
| 5372 | A | 0.414 | 0.3159 |
| 5373 | A | 0.514 | 0.3451 |
| 5374 | C | 0.421 | 0.3241 |
| 5375 | U | 0.282 | 0.2514 |
| 5376 | A | 0.349 | 0.1836 |
| 5377 | U | 0.542 | 0.0912 |
| 5378 | C | 0.205 | 0.0000 |
| 5379 | A | 0.305 | 0.0000 |
| 5380 | U | 0.506 | 0.0000 |
| 5381 | C | 0.068 | 0.0000 |
| 5382 | U | 0.074 | 0.0000 |
| 5383 | A | 0.505 | 0.0000 |
| 5384 | C | 0.321 | 0.0000 |
| 5385 | U | 0.614 | 0.0000 |
| 5386 | A | 0.185 | 0.0000 |
| 5387 | A | 0.441 | 0.0000 |
| 5388 | C | 0.677 | 0.0000 |
| 5389 | U | 0.443 | 0.0000 |
| 5390 | A | 0.311 | 0.0000 |
| 5391 | G | 0.471 | 0.0000 |
| 5392 | U | 0.617 | 0.0000 |
| 5393 | A | 0.378 | 0.0000 |
| 5394 | U | 0.312 | 0.0000 |
| 5395 | U | 0.782 | 0.0000 |
| 5396 | U | 0.492 | 0.0000 |
| 5397 | A | 0.619 | 0.0000 |
| 5398 | C | -     | 0.0000 |
| 5399 | A | -     | 0.0000 |

|      |   |   |        |
|------|---|---|--------|
| 5400 | U | - | 0.0000 |
| 5401 | U | - | 0.0000 |
| 5402 | A | - | 0.0000 |
| 5403 | C | - | 0.0000 |
| 5404 | U | - | 0.0000 |
| 5405 | A | - | 0.0000 |
| 5406 | G | - | 0.0000 |
| 5407 | U | - | 0.0000 |
| 5408 | A | - | 0.0000 |
| 5409 | U | - | 0.0000 |
| 5410 | A | - | 0.0000 |
| 5411 | U | - | 0.0000 |
| 5412 | U | - | 0.0000 |
| 5413 | A | - | 0.0000 |
| 5414 | U | - | 0.0000 |
| 5415 | C | - | 0.0000 |
| 5416 | A | - | 0.0000 |
| 5417 | U | - | 0.0000 |
| 5418 | A | - | 0.0000 |
| 5419 | U | - | 0.0000 |
| 5420 | A | - | 0.0000 |
| 5421 | C | - | 0.0000 |
| 5422 | G | - | 0.0000 |
| 5423 | G | - | 0.0000 |
| 5424 | U | - | 0.0000 |
| 5425 | G | - | 0.0000 |
| 5426 | U | - | 0.0000 |
| 5427 | U | - | 0.0000 |
| 5428 | A | - | 0.0000 |
| 5429 | G | - | 0.0000 |
| 5430 | A | - | 0.0000 |
| 5431 | A | - | 0.0000 |
| 5432 | G | - | 0.0000 |
| 5433 | A | - | 0.0000 |
| 5434 | U | - | 0.0000 |
| 5435 | G | - | 0.0000 |
| 5436 | A | - | 0.0000 |
| 5437 | C | - | 0.0000 |
| 5438 | G | - | 0.0000 |
| 5439 | C | - | 0.0000 |
| 5440 | A | - | 0.0000 |
| 5441 | A | - | 0.0000 |
| 5442 | A | - | 0.0000 |
| 5443 | U | - | 0.0000 |
| 5444 | G | - | 0.0000 |
| 5445 | A | - | 0.0000 |
| 5446 | U | - | 0.0000 |
| 5447 | G | - | 0.0000 |
| 5448 | A | - | 0.0000 |
| 5449 | G | - | 0.0000 |

|      |   |   |        |
|------|---|---|--------|
| 5450 | A | - | 0.0000 |
| 5451 | A | - | 0.0000 |
| 5452 | A | - | 0.0000 |
| 5453 | U | - | 0.0000 |
| 5454 | A | - | 0.0000 |
| 5455 | G | - | 0.0000 |
| 5456 | U | - | 0.0000 |
| 5457 | C | - | 0.0000 |
| 5458 | A | - | 0.0000 |
| 5459 | U | - | 0.0000 |
| 5460 | C | - | 0.0000 |
| 5461 | U | - | 0.0000 |
| 5462 | A | - | 0.0000 |
| 5463 | A | - | 0.0000 |
| 5464 | A | - | 0.0000 |
| 5465 | U | - | 0.0000 |
| 5466 | U | - | 0.0000 |
| 5467 | A | - | 0.0000 |
| 5468 | G | - | 0.0000 |
| 5469 | U | - | 0.0000 |
| 5470 | G | - | 0.0000 |
| 5471 | G | - | 0.0000 |
| 5472 | A | - | 0.0000 |
| 5473 | A | - | 0.0000 |
| 5474 | G | - | 0.0000 |
| 5475 | C | - | 0.0000 |
| 5476 | U | - | 0.0000 |
| 5477 | G | - | 0.0000 |
| 5478 | A | - | 0.0000 |
| 5479 | A | - | 0.0000 |
| 5480 | A | - | 0.0000 |
| 5481 | C | - | 0.0000 |
| 5482 | G | - | 0.0000 |
| 5483 | C | - | 0.0000 |
| 5484 | A | - | 0.0000 |
| 5485 | A | - | 0.0000 |
| 5486 | G | - | 0.0000 |
| 5487 | G | - | 0.0000 |
| 5488 | A | - | 0.0000 |
| 5489 | U | - | 0.0000 |
| 5490 | U | - | 0.0000 |
| 5491 | G | - | 0.0000 |
| 5492 | A | - | 0.0000 |
| 5493 | U | - | 0.0000 |
| 5494 | A | - | 0.0000 |
| 5495 | A | - | 0.0000 |
| 5496 | U | - | 0.0000 |
| 5497 | G | - | 0.0000 |
| 5498 | U | - | 0.0000 |
| 5499 | A | - | 0.0000 |

|      |   |   |        |
|------|---|---|--------|
| 5500 | A | - | 0.0000 |
| 5501 | U | - | 0.0000 |
| 5502 | A | - | 0.0000 |
| 5503 | G | - | 0.0000 |
| 5504 | G | - | 0.0000 |
| 5505 | A | - | 0.0000 |
| 5506 | U | - | 0.0000 |
| 5507 | C | - | 0.0000 |
| 5508 | A | - | 0.0000 |
| 5509 | A | - | 0.0000 |
| 5510 | U | - | 0.0000 |
| 5511 | G | - | 0.0000 |
| 5512 | A | - | 0.0000 |
| 5513 | A | - | 0.0000 |
| 5514 | U | - | 0.0000 |
| 5515 | A | - | 0.0000 |
| 5516 | U | - | 0.0000 |
| 5517 | A | - | 0.0000 |
| 5518 | A | - | 0.0000 |
| 5519 | A | - | 0.0000 |
| 5520 | C | - | 0.0000 |
| 5521 | A | - | 0.0000 |
| 5522 | U | - | 0.0000 |
| 5523 | A | - | 0.0000 |
| 5524 | U | - | 0.0000 |
| 5525 | A | - | 0.0000 |
| 5526 | A | - | 0.0000 |
| 5527 | A | - | 0.0000 |
| 5528 | A | - | 0.0000 |
| 5529 | U | - | 0.0000 |
| 5530 | G | - | 0.0000 |
| 5531 | A | - | 0.0000 |
| 5532 | U | - | 0.0000 |
| 5533 | G | - | 0.0000 |
| 5534 | A | - | 0.0000 |
| 5535 | U | - | 0.0000 |
| 5536 | A | - | 0.0000 |
| 5537 | A | - | 0.0000 |
| 5538 | U | - | 0.0000 |
| 5539 | A | - | 0.0000 |
| 5540 | A | - | 0.0000 |
| 5541 | U | - | 0.0000 |
| 5542 | A | - | 0.0000 |
| 5543 | U | - | 0.0000 |
| 5544 | U | - | 0.0000 |
| 5545 | U | - | 0.0000 |
| 5546 | A | - | 0.0000 |
| 5547 | U | - | 0.0000 |
| 5548 | A | - | 0.0000 |
| 5549 | G | - | 0.0000 |

|      |   |   |        |
|------|---|---|--------|
| 5550 | A | - | 0.0000 |
| 5551 | A | - | 0.0000 |
| 5552 | U | - | 0.0000 |
| 5553 | U | - | 0.0000 |
| 5554 | G | - | 0.0000 |
| 5555 | U | - | 0.0000 |
| 5556 | G | - | 0.0000 |
| 5557 | U | - | 0.0000 |
| 5558 | A | - | 0.0000 |
| 5559 | G | - | 0.0000 |
| 5560 | A | - | 0.0000 |
| 5561 | A | - | 0.0000 |
| 5562 | U | - | 0.0000 |
| 5563 | U | - | 0.0000 |
| 5564 | G | - | 0.0000 |
| 5565 | C | - | 0.0000 |
| 5566 | A | - | 0.0000 |
| 5567 | G | - | 0.0000 |
| 5568 | A | - | 0.0000 |
| 5569 | U | - | 0.0000 |
| 5570 | U | - | 0.0000 |
| 5571 | C | - | 0.0000 |
| 5572 | C | - | 0.0000 |
| 5573 | C | - | 0.0000 |
| 5574 | U | - | 0.0000 |
| 5575 | U | - | 0.0000 |
| 5576 | U | - | 0.0000 |
| 5577 | U | - | 0.0000 |
| 5578 | A | - | 0.0000 |
| 5579 | U | - | 0.0000 |
| 5580 | G | - | 0.0000 |
| 5581 | G | - | 0.0000 |
| 5582 | A | - | 0.0000 |
| 5583 | U | - | 0.0000 |
| 5584 | U | - | 0.0000 |
| 5585 | C | - | 0.0000 |
| 5586 | C | - | 0.0000 |
| 5587 | U | - | 0.0000 |
| 5588 | A | - | 0.0000 |
| 5589 | A | - | 0.0000 |
| 5590 | A | - | 0.0000 |
| 5591 | U | - | 0.0000 |
| 5592 | C | - | 0.0000 |
| 5593 | C | - | 0.0000 |
| 5594 | U | - | 0.0000 |
| 5595 | U | - | 0.0000 |
| 5596 | G | - | 0.0000 |
| 5597 | A | - | 0.0000 |
| 5598 | G | - | 0.0000 |
| 5599 | G | - | 0.0000 |



|      |   |   |        |
|------|---|---|--------|
| 5600 | A | - | 0.0000 |
| 5601 | G | - | 0.0000 |
| 5602 | A | - | 0.0000 |
| 5603 | A | - | 0.0000 |
| 5604 | C | - | 0.0000 |
| 5605 | U | - | 0.0000 |
| 5606 | U | - | 0.0000 |
| 5607 | C | - | 0.0000 |
| 5608 | U | - | 0.0000 |
| 5609 | A | - | 0.0000 |
| 5610 | G | - | 0.0000 |
| 5611 | U | - | 0.0000 |
| 5612 | A | - | 0.0000 |
| 5613 | U | - | 0.0000 |
| 5614 | A | - | 0.0000 |
| 5615 | U | - | 0.0000 |
| 5616 | U | - | 0.0000 |
| 5617 | C | - | 0.0000 |
| 5618 | U | - | 0.0000 |
| 5619 | G | - | 0.0000 |
| 5620 | U | - | 0.0000 |
| 5621 | A | - | 0.0000 |
| 5622 | U | - | 0.0000 |
| 5623 | A | - | 0.0000 |
| 5624 | C | - | 0.0000 |
| 5625 | C | - | 0.0000 |
| 5626 | U | - | 0.0000 |
| 5627 | A | - | 0.0000 |
| 5628 | A | - | 0.0000 |
| 5629 | U | - | 0.0000 |
| 5630 | A | - | 0.0000 |
| 5631 | U | - | 0.0000 |
| 5632 | U | - | 0.0000 |
| 5633 | A | - | 0.0000 |
| 5634 | U | - | 0.0000 |
| 5635 | A | - | 0.0000 |
| 5636 | G | - | 0.0000 |
| 5637 | C | - | 0.0000 |
| 5638 | C | - | 0.0000 |
| 5639 | U | - | 0.0000 |
| 5640 | U | - | 0.0000 |
| 5641 | U | - | 0.0000 |
| 5642 | A | - | 0.0000 |
| 5643 | U | - | 0.0000 |
| 5644 | C | - | 0.0000 |
| 5645 | A | - | 0.0000 |
| 5646 | A | - | 0.0000 |
| 5647 | C | - | 0.0000 |
| 5648 | A | - | 0.0000 |
| 5649 | A | - | 0.0000 |

|      |   |   |        |
|------|---|---|--------|
| 5650 | U | - | 0.0000 |
| 5651 | G | - | 0.0000 |
